# Supplementary material for: An open-access database of grape harvest dates for climate research: data description and quality assessment
Source: Copernicus journal article supplement (doi:10.5194/cp-8-1403-2012), 2012-09-03
Supplement: Supplementary file 1 [file Supplement.xlsx]

## Sheet: S0. Reference
An open-access database of Grape Harvest Dates for climate research: data description and quality assessment
Daux V., Garcia de Cortazar-Atauri I., Yiou P., Chuine I., Garnier E., Le Roy Ladurie E., Mestre O., Tardaguila J.
Clim. Past.

## Sheet: S1.  Information on GHD series
Information about the series of the database
Area	GHD-RCS	Name of the series	Period	Source	Present day vineyard	Lat. °N	Long.°E	Alt. (m)	Nb Obs	Comments	Reason why the series is not included in the GHD-RCS
Alsace	Als	Ammerschwihr	1803 - 1838	(Muller, 1991; Muller, 1995; Muller, 1997; Muller, 2005)	AOC Alsace	48.12	7.28	235	34
		Barr	1805; 1854	(Muller, 1991; Muller, 1995; Muller, 1997; Muller, 2005)	AOC Alsace	48.4	7.43	221	2	Not used to calculate the GDH-RCS	Only 2 data.
		Blienschwiller	1848 - 1893	(Muller, 1991; Muller, 1995; Muller, 1997; Muller, 2005)	AOC Alsace	48.33	7.42	240	13
		Colmar	1972 - 2005	(Duchêne and Schneider, 2005)	AOC Alsace	48.05	7.38	189	34	Riesling
		DDAF 1	1950 - 2002	Direction Départementale de l'Agriculture et de la Forêt d'Alsace	AOC Alsace				53
		DDAF 2	1970 - 2002	Direction Départementale de l'Agriculture et de la Forêt d'Alsace	AOC Alsace				33	Riesling
		DDAF 3	1970 - 2002	Direction Départementale de l'Agriculture et de la Forêt d'Alsace	AOC Alsace				33	Sylvaner. Not used to calculate the GDH-RCS	This variety was not identified as early variety and not considered as an important variety in the past. See Yiou et al., 2012.
		DDAF 4	1970 - 2002	Direction Départementale de l'Agriculture et de la Forêt d'Alsace	AOC Alsace				33	Muscat. Not used to calculate the GDH-RCS	idem
		DDAF 5	1970 - 2002	Direction Départementale de l'Agriculture et de la Forêt d'Alsace	AOC Alsace				33	Gewurztraminer. Not used to calculate the GDH-RCS	idem
		DDAF 6	1970 - 2002	Direction Départementale de l'Agriculture et de la Forêt d'Alsace	AOC Alsace				32	Pinot gris et noir. Not used to calculate the GDH-RCS	idem
		Eguisheim	1854 - 1926	(Muller, 1991; Muller, 1995; Muller, 1997; Muller, 2005)	AOC Alsace	48.03	7.3	206	55
		Mulhouse	1802 - 1851	(Muller, 1991; Muller, 1995; Muller, 1997; Muller, 2005)	Without AOC	47.75	7.33	255	3	Not used to calculate the GDH-RCS	Only 3 data.
		Obernai	1858 - 1869	(Muller, 1991; Muller, 1995; Muller, 1997; Muller, 2005)	AOC Alsace	48.45	7.47	184	10
		Pfaffenheim	1932 - 1947	(Muller, 1991; Muller, 1995; Muller, 1997; Muller, 2005)	AOC Alsace	47.98	7.28	229	16
		Ribeauvillé	1706 - 1868	(Muller, 1991; Muller, 1995; Muller, 1997; Muller, 2005)	AOC Alsace	48.18	7.32	260	29
		Riquewihr	1702 - 1786	(Muller, 1991; Muller, 1995; Muller, 1997; Muller, 2005)	AOC Alsace	48.17	7.28	303	77
		Soultz	1757 - 1788	(Muller, 1991; Muller, 1995; Muller, 1997; Muller, 2005)	AOC Alsace	48.57	7.48	186	31
		Thann	1700 - 1783	(Muller, 1991; Muller, 1995; Muller, 1997; Muller, 2005)	AOC Alsace	47.8	7.1	335	72
		Turckheim	1805 - 1857	(Muller, 1991; Muller, 1995; Muller, 1997; Muller, 2005)	AOC Alsace	48.08	7.27	238	9
Auvergne	Auv	Beaumont-les-Randan	1824 - 1868	(Angot, 1883)	Without AOC	45.98	3.38	328	43
		Beauregard - l'évêque	1831 - 1879	(Angot, 1883)	Without AOC	45.81	3.29	374	49
		Brassac-les-Mines	1819 - 1868	(Angot, 1883)	AOC Cotes d'Auvergne (Rouge de Boudes)	45.4	3.32	419	45
		Bresnay	1817 - 1879	(Angot, 1883)	AOC Bourbonnais	46.43	3.25	264	62
		Brioude	1828 - 1879	(Angot, 1883)	AOC Cotes d'Auvergne (Rouge de Boudes)	45.28	3.38	440	52
		Chadeleuf	1806 - 1879	(Angot, 1883)	AOC Cotes d'Auvergne	45.58	3.17	451	67
		Chambezon	1806 - 1833	(Angot, 1883)	AOC Cotes d'Auvergne (Rouge de Boudes)	45.35	3.25	540	21
		Contigny	1800 - 1878	(Angot, 1883)	AOC Bourbonnais	46.35	3.3	227	60
		Lamontgie	1808 - 1879	(Angot, 1883)	AOC Cotes d'Auvergne	45.47	3.33	473	67
		Ménétrol	1813 - 1879	(Angot, 1883)	AOC Cotes d'Auvergne (Madargues et Chateaugay)	45.87	3.12	328	54
		Riom	1825 - 1879	(Angot, 1883)	AOC Cotes d'Auvergne (Madargues et Chateaugay)	45.88	3.08	345	55
		Ris	1816 - 1879	(Angot, 1883)	Without AOC	45.98	3.5	322	63
		Saint-Bonnet-Lès-Allier	1799 - 1879	(Angot, 1883)	AOC Cotes d'Auvergne	45.73	3.27	417	68
		Teilhede	1811 - 1879	(Angot, 1883)	AOC Cotes d'Auvergne (Madargues et Chateaugay)	45.95	3.07	477	37
Auxerre vineyard	Aux	Auxerre	1751 - 1879	(Angot, 1883)	AOC Grand Auxerrois (Bourgogne)	47.78	3.57	110	60
		Avallon	1814 - 1879	(Angot, 1883)	Without AOC	47.48	3.9	234	128
Beaujolais (and Maconnais)	Bea	Beaujolais	1893 - 1976	(Legrand, 1977)	Beaujolais				68
		Letra	1942; 1956; 1961	(Legrand, 1977)	Beaujolais	45.95	4.52	336	3
		Liergues	1929	(Legrand, 1977)	Beaujolais	45.97	4.65	245	1	Not used to calculate the GDH-RCS	Only 1 data
		Morey	1800 - 1879	(Angot, 1883)	Without AOC	46.8	4.58	363	60	Not used to calculate the GDH-RCS	No significant correlation with the other series of the region
		Northern Maconnais	1892	(Legrand, 1977)					1	Not used to calculate the GDH-RCS	Only 1 data
Bordeaux	Bor	Archevêque de Bordeaux	1560 - 1590	(Le Roy Ladurie, 1967)	AOC Bordeaux	44.83	-0.56	6	18	Not used to calculate the GDH-RCS	No significant correlations with the other series of the region
		Bordeaux (Jurade)	1532 - 1788	(Le Roy Ladurie, 1967)	AOC Bordeaux	44.84°	-0.57	6	46
		Bordelais - B1	1880 - 1977	(Legrand, 1978)	AOC Medoc				98
		Château Mangot	1795 - 1907	Vacher J. – original data	AOC Saint Emilion	44.87	-0.1	25	113
		Gironde (Abbaye de Bonlieu)	1666 - 1756	(Le Roy Ladurie, 1967)	AOC Bordeaux	44.88	-0.48	19	6
		Gruaud Larose	1823 - 1879	(Angot, 1883)	AOC Saint Julien	45.15	-0.75	9	57
		Ht Brion - WEB	1938 - 2003	‘Château Haut Brion’ vineyard (http://www.haut-brion.com) – original data	AOC Medoc	44.82	-0.61	29	55
		Medoc - B2	1880 - 1973	(Legrand, 1978)	AOC Medoc				93
		Medoc - B3	1880 - 1951	(Legrand, 1978)	AOC Medoc				71
		Medoc Angot	1795 - 1879	(Angot, 1883)	AOC Medoc				85
		Pichon Longueville	1449 - 1879	(Angot, 1883; Le Roy Ladurie, 1967)	AOC Medoc	45.18	-0.75	13	130
		Saint Seurin de Bordeaux	1591 - 1699	(Le Roy Ladurie, 1967)	AOC Bordeaux	44.83	-0.58	14	32
		Sainte Croix de Bordeaux	1593 - 1626	(Le Roy Ladurie, 1967)	AOC Bordeaux	44.83	-0.55	9	5
		Savignac	1709 - 1718	(Le Mao, 2004)	AOC Graves	44.52	-0.1	42	10	Not used to calculate the GDH-RCS	No significant correlations with the other series of the region
		Senechal de Bordeaux	1586 - 1596	(Le Roy Ladurie, 1967)	AOC Bordeaux	44.83	-0.56	6	6
		St Maixant	1910 - 1976	(Legrand, 1978)	AOC Entre-deux-mers; AOC Sait Croix du Mont	44.57	-0.25	14	43
Burgundy	Bur	Aloxe-Corton	1837 - 1891	(Danguy and Aubertin, 1978)	AOC Bourgogne	47.05	4.85	238	55
		Beaune 1	1700 - 2006	(1700 - 1939) (Danguy and Aubertin, 1978); (1955 - 2006) Maison Bouchard - original data	AOC Bourgogne	47.02	4.83	252	249
		Beaune 2	1941 - 2004	Regional service of plant protection – original data	AOC Bourgogne	47.02	4.83	252	64
		Beaune 3	1700 - 1976	(Angot, 1883) for (1700 – 1879) and (Legrand, 1977) for (1881 – 1976)	AOC Bourgogne	47.02	4.83	214	272
		Bonache	1354 - 1426	Dubois H. pers. Comm. – original data	AOC Bourgogne				48	Location of the vineyard not identified precisely	Location unknown
		Burgundy 1	1977 - 2003	Direction Départementale de l'Agriculture et de la Forêt, Côte d'Or - Original data	AOC Bourgogne	47.05	5.17	250	26
		Burgundy 2	1911 - 1986	(Collective, 1985-2010)	AOC Bourgogne	47.05	5.17	250	58	White variety	UTILISE?
		Chaignay	1722 - 1741	Multimedia library of Avignon (Chobaut’s collection, MS 5961, MS 6381)	AOC Bourgogne	47.47	5.07	347	18
		Chambolle	1716 - 1890	(Danguy and Aubertin, 1978)	AOC Bourgogne	47.18	4.95	279	175
		Corton	1372 - 1426	Dubois H. pers. Comm. – original data	AOC Bourgogne	47.07	4.85	257	38
		Cotes d'Or	1948 - 1996	(Coates, 1997)	AOC Bourgogne	47.05	5.17	250	27
		Dijon	1366 - 1879	(Angot, 1883)	AOC Bourgogne	47.32	5.03	250	466
		La Rochepot	1970 - 2006	(Chabin et al., 2007)	AOC Bourgogne	46.95	4.67	418	37
		Marsannay la Cote	1628 - 1786	Multimedia library of Avignon (Chobaut’s collection, MS 5961, MS 6381)	AOC Bourgogne	47.27	4.98	272	17
		Marsannay le Bois	1723 - 1738	Multimedia library of Avignon (Chobaut’s collection, MS 5961, MS 6381)	AOC Bourgogne	47.43	5.08	309	9
		Meloisey	1380 - 1426	Dubois H. pers. Comm. – original data	AOC Bourgogne	47.02	4.73	407	22
		Monthèlie	1381 - 1426	Dubois H. pers. Comm. – original data	AOC Bourgogne	46.98	4.77	278	28
		Pommard	1355 - 1426	Dubois H. pers. Comm. – original data	AOC Bourgogne	47	4.78	245	39
		Puligny - Montrachet	1991 - 2005	Leflaive O.’s vineyard - original data	AOC Bourgogne	46.93	4.75	228	13
		Saint-Romain	1392	Dubois H. pers. Comm. – original data	AOC Bourgogne	46.98	4.7	344	1	Not used to calculate the GDH-RCS	Only 1 data.
		Volnay	1372 - 1426; 1689 - 1976	Dubois H. pers. Comm. – original data for (1372 - 1426), (Angot, 1883) for (1689 - 1879) and (Legrand, 1977) for (1880 - 1976)	AOC Bourgogne	47	4.77	311	322
Champagne 1 (Epernay and Reims)	Cha1	Avenay	1840-1880	Formulaire n°78e météorologie nationale e.c.m.-t/clim	AOC Champagne	49.07	4.04	83	41
		Avize	1861-1880	Formulaire n°78e météorologie nationale e.c.m.-t/clim	AOC Champagne	48.97	4	170	20
		Aÿ 1	1874 - 1899	(Legrand, 1977)	AOC Champagne	49.05	4	75	26
		Aÿ 2	1839-1880	Formulaire n°78e météorologie nationale e.c.m.-t/clim	AOC Champagne	49.05	4	75	42
		Baslieux-les-Fismes	1881-1901	Formulaire n°78e météorologie nationale e.c.m.-t/clim	AOC Champagne	49.32	3.7	95	17
		Bouzy	1856-1880	Formulaire n°78e météorologie nationale e.c.m.-t/clim	AOC Champagne	49.07	4.15	111	25
		Cauroy-les-Hermonville	1826 - 1879	(Angot, 1883)	AOC Champagne	49.33	3.92	87	50
		Châlons	1841-1880	Formulaire n°78e météorologie nationale e.c.m.-t/clim	Without AOC	48.95	4.37	85	40
		Chamery	1840-1880	Formulaire n°78e météorologie nationale e.c.m.-t/clim	AOC Champagne	49.17	3.95	150	41
		C 1	1900 - 1976	(Legrand, 1977)	AOC Champagne				76
		C 2	1942 - 2006	Comité Interprofessionnel des Vins de Champagne - original data	AOC Champagne				65
		Cramant	1825 - 1879	(Angot, 1883)	AOC Champagne (Côtes de Blancs)	48.98	3.98	204	56
		Cumières	1840-1880	Formulaire n°78e météorologie nationale e.c.m.-t/clim	AOC Champagne	49.07	3.92	70	41
		Damery	1863-1880	Formulaire n°78e météorologie nationale e.c.m.-t/clim	AOC Champagne	49.07	3.88	71	18
		Dizy	1841-1880	Formulaire n°78e météorologie nationale e.c.m.-t/clim	AOC Champagne	49.07	3.97	72	40
		Epernay	1841-1880	Formulaire n°78e météorologie nationale e.c.m.-t/clim	AOC Champagne	49.03	3.95	118	40
		Fismes	1884-1900	Formulaire n°78e météorologie nationale e.c.m.-t/clim	AOC Champagne	49.3	3.67	73	9
		Hautvillers	1841-1880	Formulaire n°78e météorologie nationale e.c.m.-t/clim	AOC Champagne	49.08	3.93	204	40
		Hermonville	1841-1880	Formulaire n°78e météorologie nationale e.c.m.-t/clim	AOC Champagne	49.33	3.9	106	39
		Mesnil-sur-Oger	1848-1880	Formulaire n°78e météorologie nationale e.c.m.-t/clim	AOC Champagne	48.93	4.02	126	33
		Pierry	1841-1880	Formulaire n°78e météorologie nationale e.c.m.-t/clim	AOC Champagne	49.02	3.93	85	40
		Pouillon	1841-1880	Formulaire n°78e météorologie nationale e.c.m.-t/clim	AOC Champagne	49.3	3.95	141	40
		Sezanne	1881-1933	Formulaire n°78e météorologie nationale e.c.m.-t/clim	AOC Champagne	48.72	3.72	136	13
		Trigny	1841-1880	Formulaire n°78e météorologie nationale e.c.m.-t/clim	AOC Champagne	49.3	3.88	121	40
		Verzenay	1841-1880	Formulaire n°78e météorologie nationale e.c.m.-t/clim	AOC Champagne	49.15	4.15	187	40
		Verzy	1840-1880	Formulaire n°78e météorologie nationale e.c.m.-t/clim	AOC Champagne	48.13	4.17	161	41
		Ville-Dommange	1806-1880	Formulaire n°78e météorologie nationale e.c.m.-t/clim	AOC Champagne	49.2	3.93	188	44
		Vinay	1857-1880	Formulaire n°78e météorologie nationale e.c.m.-t/clim	AOC Champagne	49.01	3.9	99	24
Champagne 2 (Côtes des Bar)	Cha2	Arsonval	1818 - 1879	(Angot, 1883)	AOC Champagne (Cote de Bar)	48.27	4.63	155	60
		Bouilly	1799 - 1863	Archives of Bouilly city – original data	Without AOC	48.18	3.98	160	38
		Couvignon	1804 - 1879	(Angot, 1883)	AOC Champagne (Cote de Bar)	48.2	4.65	212	76
		Essoyes	1815 - 1879	(Angot, 1883)	AOC Champagne (Cote de Bar)	48.05	4.53	181	64
		Les Riceys	1800 - 1879	(Angot, 1883)	AOC Champagne (Cote de Bar)	47.98	4.28	210	80
		Loches-sur-Ource)	1799 - 1879	(Angot, 1883)	AOC Champagne (Cote de Bar)	48.05	4.5	178	79
Gaillac- South-West	Gai	Castres	1589 - 1756	(Le Roy Ladurie, 1967)	Without d'AOC	43.43	2.23	179	8
		Cordes-sur-Ciel	1612 - 1680	(Le Roy Ladurie, 1967)	AOC Gaillac (Le Plateau Cordais)	44.05	1.95	204	16
		Gaillac	1642 - 1789	(Le Roy Ladurie, 1967)	AOC Gaillac (Le Plateau Cordais)	43.9	1.9	144	30
		Montpezat-en-Quercy	1483 - 1772	(Le Roy Ladurie, 1967)	AOC Coteaux du Quercy	44.23	1.47	221	21
		Saïx	1686 - 1787	(Le Roy Ladurie, 1967)	Without d'AOC	43.57	2.18	183	7
Germany	Ger	Kurnbach	1611 - 1807	(Angot, 1883)	Between AOC Baden and Wurttemberg	49.07	8.83	197	178
		Stuttgart	1765 - 1830	(Angot, 1883)	AOC Wurttenberg	48.77	9.17	252	62
High Loire Valley	HLV	Bourges	1600 - 1879	(Angot, 1883)	Without AOC	47.07	2.38	149	85
		Livry	1821 - 1857	(Angot, 1883)	Without AOC	46.77	3.07	227	31
		Vatan	1817 - 1879	(Angot, 1883)	Without AOC	47.07	1.8	129	62
Ile-de-France	IdF	Argenteuil	1613 - 1977	(Duchaussoy, 1928) and (Legrand, 1978)	Without Aoc	48.93	2.23	40	308
		Athis	1526 - 1597	(Baulant et al., 1978)	Without Aoc	49.02	4.12	74	25
		Chartres	1478 - 1619	(Angot, 1883)	Without AOC	48.43	1.48	159	86
		Clamart	1711 - 1876	(Anonymous, 1928)	Without Aoc	48.78	2.25	121	35
		Denainvilliers - Boesses	1741 - 1879	(Angot, 1883)	Without AOC	48.15	2.33	115	129
		Grigny	1526 - 1599	(Baulant et al., 1978)	Without Aoc	48.65	2.38	62	40
		Issy	1485 - 1510	(Baulant et al., 1978)	Without Aoc	48.82	2.27	53	4	Not used to calculate the GDH-RCS	Only 4 data and no significant correlation with the other series of the region
		Ladon	1813 - 1879	(Angot, 1883)	Without AOC	48	2.53	97	66
		Menilmontant-Fesca	1540 - 1593	(Baulant et al., 1978)	Without Aoc	48.85	2.38	59	27
		Meudon	1485 - 1511	(Baulant et al., 1978)	Without Aoc	48.8	2.23	96	5
		Montmorency	1740 - 1872	(Duchaussoy, 1928)	Without Aoc	48.98	2.32	127	111
		Montrouge	1526 - 1599	(Baulant et al., 1978)	Without Aoc	48.82	2.32	74	33
		Paris (Quinze-Vingt)	1502 - 1542	(Baulant et al., 1978)	Without Aoc	48.85	2.37	40	32
		Thiais	1485 - 1511	(Baulant et al., 1978)	Without Aoc	48.75	2.43	34	6
		Vaugirard	1485 - 1593	(Baulant et al., 1978)	Without Aoc	48.83	2.3	52	21
		Villejuif	1901 - 1905	Archives of Villejuif city – original data	Without Aoc	48.78	2.35	104	4
Jura	Jur	Arbois	1841-1895	Formulaire n°78e météorologie nationale e.c.m.-t/clim	AOC Arbois	46.9	5.77	299	39
		Arsures	1841-1879	Formulaire n°78e météorologie nationale e.c.m.-t/clim	AOC Arbois	46.94	5.79	328	38
		Beaufort	1850-1894	Formulaire n°78e météorologie nationale e.c.m.-t/clim	AOC Cotes du Jura	46.57	5.43	322	35
		Besançon	1448 - 1846	(Garnier et al., 2010)	Without AOC	47.23	6.02	248	269
		Bucey-les Gy	1823 - 1878	(Angot, 1883)	Without AOC	47.42	5.84	236	56
		Chaumergy	1889-1911	Formulaire n°78e météorologie nationale e.c.m.-t/clim	Without AOC	46.84	5.47	213	4
		Chaussin	1894-1898	Formulaire n°78e météorologie nationale e.c.m.-t/clim	Without AOC	46.96	5.41	195	5
		Dole	1841-1911	Formulaire n°78e météorologie nationale e.c.m.-t/clim	Without AOC	47.07	5.48	226	53
		Gy	1818 - 1879	(Angot, 1883)	Without AOC	47.4	5.8	227	61
		Lons-le-Saulnier	1650 - 1879	(Angot, 1883)	AOC Cotes du Jura	46.67	5.55	258	181
		Montbeliard	1616 - 1855	Archives of Montbéliard city – original data	Without AOC	47.5	6.8	318	52	Not used to calculate the GDH-RCS	Obtained after paper submission.
		Ougney	1892-1895	Formulaire n°78e météorologie nationale e.c.m.-t/clim	Without AOC	47.24	5.67	206	4
		Poligny	1841-1890	Formulaire n°78e météorologie nationale e.c.m.-t/clim	AOC Cotes du Jura	46.83	5.7	378	43
		Pupillin	1909 - 1976	(Legrand, 1977)	Jura (Arbois)	46.88	5.76	458	64
		Salins les Bains - 1	1508 - 1879	(Angot, 1883)	AOC Cotes du Jura	46.93	5.88	376	300
		Salins les Bains - 2	1864-1896	Rouget (1897)	AOC Cotes du Jura	46.93	5.88	376	32	Not used to calculate the GDH-RCS	Obtained after paper submission.
		Soing-Cubry-Charentenay	1826-1852	Formulaire n°78e météorologie nationale e.c.m.-t/clim	Without AOC	47.58	5.88	210	12	Not used to calculate the GDH-RCS	Obtained after paper submission.
		Thise	1762 - 1775	Archives of Thise city – original data	Without AOC	47.27	6.08	276	13
		Villers-Farlay	1890-1896	Formulaire n°78e météorologie nationale e.c.m.-t/clim	Without AOC	47	5.75	236	5	Not used to calculate the GDH-RCS	Obtained after paper submission.
		Vuillafans	1808 - 1879	(Angot, 1883)	Without AOC	47.06	6.22	349	67
Languedoc (Roussillon- Mediterranean)	Lan	Aiguesmortes	1887	Formulaire n°78e météorologie nationale e.c.m.-t/clim	AOC Languedoc	43.57.	4.18	1	1	Not used to calculate the GDH-RCS	Only 1 data.
		Aniane	1624 - 1715	(Le Roy Ladurie, 1967)	AOC Languedoc	43.68	3.57	71	53
		Arles	1609 - 1623	(Pichard, 1991)	AOC Coteaux d'Aix en Provence	43.67	4.62	7	9
		Arles Plan	1619 - 1623	(Pichard, 1991)	AOC Coteaux d'Aix en Provence	43.67	4.62	7	4
		Asperes - Ménard	1973 - 2005	Boutin F.’s vineyard – original data	AOC Côtes du Rhône	43.8	4.03	77	33	Carignan
		Asperes - Olivette	1973 - 2007	Boutin F.’s vineyard – original data	AOC Côtes du Rhône	43.8	4.03	77	35	Carignan
		Barbaira	1900-1903	Formulaire n°78e météorologie nationale e.c.m.-t/clim	AOC Corbieres	43.18	2.5	81	3	Not used to calculate the GDH-RCS	Only 3 data.
		Berlou	2004	Chambre d'Agriculture, Herault - Original data	AOC Languedoc	43.49	2.95	205	3	Grenache noir. Not used to calculate the GDH-RCS	Only 3 data.
		Béziers	1524 - 1791	(Le Roy Ladurie, 1967)	Without AOC	43.33	3.22	66	50
		Cabrières 1	1916-1918	Formulaire n°78e météorologie nationale e.c.m.-t/clim	AOC Languedoc	43.9	4.47	146	3	Not used to calculate the GDH-RCS	Only 3 data
		Cabrières 2	2001	Chambre d'Agriculture, Herault - Original data	AOC Languedoc	43.9	4.47	146	3	Grenache noir. Not used to calculate the GDH-RCS	Onlu 3 data
		Castelnau-de-Guers	2002-2005	Chambre d'Agriculture, Herault - Original data	AOC Languedoc	43.44	3.44	27	6	Piquepoul blanc
		Cessenon-sur-Orb 1	1554 - 1778	(Le Roy Ladurie, 1967)	AOC Saint Chinian	43.43	3.03	82	8
		Cessenon-sur-Orb 2	2002-2004	Chambre d'Agriculture, Herault - Original data	AOC Languedoc	43.43	3.03	82	4	Grenache noir. Not used to calculate the GDH-RCS	Only 4 data and no significant correlation with the other series of the region
		Clermont l'Herault	1882-1883	Formulaire n°78e météorologie nationale e.c.m.-t/clim	AOC Languedoc	43.62	3.43	117	2	Not used to calculate the GDH-RCS	Only 2 data.
		Domaine Méric - Montpellier	1737 - 1800	(Le Roy Ladurie, 1967)	AOC Languedoc	43.62	3.88	42	63
		Durban-Corbieres	1850-1885	Formulaire n°78e météorologie nationale e.c.m.-t/clim	AOC Corbieres	42.98	2.82	192	33
		Fabrègues	1694 -1771	(Le Roy Ladurie, 1967)	AOC Languedoc	43.55	3.77	32	6
		Frontignan	1679 - 1784	(Le Roy Ladurie, 1967)	AOC Muscat de Frontignan	43.47	3.75	10	80
		Gignac	1608 - 1789	(Le Roy Ladurie, 1967)	AOC Languedoc	43.65	3.53	62	75
		Grabels-Massanne	1890	Formulaire n°78e météorologie nationale e.c.m.-t/clim	AOC Languedoc	43.63	3.78	74	1	Not used to calculate the GDH-RCS	Only 1 data.
		Lavérune	1910-1999	Domaine Guizard - Original data	AOC Languedoc	43.58	3.8	36	82
		La Caunette	2003	Chambre d'Agriculture, Herault - Original data	AOC Languedoc	43.35	2.78	142	3	Grenache noir. Not used to calculate the GDH-RCS	Only 3 data.
		Lansargues	1698 - 1789	(Le Roy Ladurie, 1967)	AOC Languedoc	43.65	4.06	7	57
		Le Bousquet d'Orb	1887	Formulaire n°78e météorologie nationale e.c.m.-t/clim	AOC Languedoc	43.68	3.15	298	1	Not used to calculate the GDH-RCS	Only 1 data.
		Le Terral	1850-1884	Formulaire n°78e météorologie nationale e.c.m.-t/clim	AOC Languedoc	43.55	3.87	10	35	Not used to calculate the GDH-RCS	No correlations with tyhe other series of the region. Possible explanation: very early variety or differnt wine type
		Lezignan	1887	Formulaire n°78e météorologie nationale e.c.m.-t/clim	AOC Corbieres	43.2	2.75	45	1	Not used to calculate the GDH-RCS	Only 1 data.
		Lodève	1743 - 1790	(Le Roy Ladurie, 1967)	AOC Languedoc	43.73	3.32	174	44
		Lunel	1610 - 1788	(Le Roy Ladurie, 1967)	AOC Languedoc	43.67	4.13	10	110
		Maraussan 1	1989-1991	Chambre d'Agriculture, Herault - Original data	AOC Languedoc	43.36	3.15	35	5	Marsane. Not used to calculate the GHD-RCS	Variety not identified as an early variety
		Maraussan 2	1989-1991	Chambre d'Agriculture, Herault - Original data	AOC Languedoc	43.36	3.15	35	5	Roussanne
		Maraussan 3	1990	Chambre d'Agriculture, Herault - Original data	AOC Languedoc	43.36	3.15	35	3	Grenache blanc. Not used to calculate the GDH-RCS	Variety not identified as an early variety and not considered as an important variety in the past. See Yiou et al., 2012.
		Maraussan 4	1990-1991	Chambre d'Agriculture, Herault - Original data	AOC Languedoc	43.36	3.15	35	4	Viognier. Not used to calculate the GDH-RCS	Only 4 data and no correlation with the other series of the region
		Marseille	1750 - 1775	(Pichard, 1991)	AOC Coteaux d'Aix en Provence	43.28	5.37	31	15
		Marsillargues	1604 - 1749	(Le Roy Ladurie, 1967)	Without AOC	43.65	4.17	6	104
		Mauguio	1772 - 1788	(Le Roy Ladurie, 1967)	AOC Languedoc	43.6	4	10	15
		Meynes	1885	Formulaire n°78e météorologie nationale e.c.m.-t/clim	AOC Côtes du Rhône	43.87	4.55	39	1	Not used to calculate the GDH-RCS	Only 1 data.
		Meze	1865-1880	Formulaire n°78e météorologie nationale e.c.m.-t/clim	AOC Languedoc	43.42	3.6	10	16	Not used to calculate the GDH-RCS	Completely different from the other series of the region; variety too early or different wine type ?
		Montfrin	1884	Formulaire n°78e météorologie nationale e.c.m.-t/clim	AOC Languedoc	43.87	4.58	29	1	Not used to calculate the GDH-RCS	Only 1 data.
		Montpellier	1536 - 1770	(Le Roy Ladurie, 1967)	AOC Languedoc	43.6	3.87	30	53
		Montpellier - Jardin des Plantes	1890	Formulaire n°78e météorologie nationale e.c.m.-t/clim	AOC Languedoc	43.6	3.87	35	1	Not used to calculate the GDH-RCS	Only 1 data.
		Montpeyroux	1702 -1746	(Le Roy Ladurie, 1967)	AOC Languedoc	43.68	3.5	140	22
		Moussan	1898-1907	Formulaire n°78e météorologie nationale e.c.m.-t/clim	AOC Corbieres	43.23	2.93	31	2	Not used to calculate the GDH-RCS	Only 2 data.
		Moux	1900-1907	Formulaire n°78e météorologie nationale e.c.m.-t/clim	AOC Corbieres	43.17	2.65	90	3	Not used to calculate the GDH-RCS	Only 3 data
		Murviel-lès-Béziers	2005-2006	Chambre d'Agriculture, Herault - Original data	AOC Languedoc	43.44	3.15	89	4	Cinsault
		Narbonne	1588 - 1746	(Le Roy Ladurie, 1967)	AOC Corbieres	43.17	3	8	12
		Olonzac	1870-1880	Formulaire n°78e météorologie nationale e.c.m.-t/clim	AOC Languedoc	43.28	2.72	52	11
		Peyriac - Minervois	1840-1932	Formulaire n°78e météorologie nationale e.c.m.-t/clim	AOC Minervois	43.28	2.55	168	45
		Pezenas	1890	Formulaire n°78e météorologie nationale e.c.m.-t/clim	AOC Languedoc	43.45	3.42	22	1	Not used to calculate the GDH-RCS	Only 1 data.
		Port La nouvelle	1907	Formulaire n°78e météorologie nationale e.c.m.-t/clim	AOC Corbieres	43.02	3.05	1	1	Not used to calculate the GDH-RCS	Only 1 data
		Poulx	1925-1933	Formulaire n°78e météorologie nationale e.c.m.-t/clim	AOC Côtes du Rhône	43.9	4.42	162	7
		Poussan	1849-1883	Formulaire n°78e météorologie nationale e.c.m.-t/clim	AOC Languedoc	43.48	3.67	46	32	Not used to calculate the GDH-RCS	Completely different from the other series of the region; variety too early or different wine type ?
		Pouzolles	2000-2003	Chambre d'Agriculture, Herault - Original data	AOC Languedoc	43.48	3.27	78	6	Syrah
		Prades-le-Lez	2001-2003	Chambre d'Agriculture, Herault - Original data	AOC Languedoc	43.7	3.86	65	5	Syrah
		Puisserguier	2000-2003	Chambre d'Agriculture, Herault - Original data	AOC Languedoc	43.36	3.04	80	6	Syrah
		Rochet	1888	Formulaire n°78e météorologie nationale e.c.m.-t/clim	AOC Languedoc	43.62	3.9	29	1	Not used to calculate the GDH-RCS	Only 1 data.
		Roquebrun	1999; 2001	Chambre d'Agriculture, Herault - Original data	AOC Languedoc	43.5	3.03	104	4	Grenache noir. Not used to calculate the GDH-RCS	Only 4 data.
		Roquecourbe-Minervois	1932	Formulaire n°78e météorologie nationale e.c.m.-t/clim	AOC Minervois	43.22	2.63	56	1	Not used to calculate the GDH-RCS	Only 1 data.
		Saint Hilaire	1840-1903	Formulaire n°78e météorologie nationale e.c.m.-t/clim	-	43.08	2.3	284	43
		Saint Marcel sur Aude	1895-1898	Formulaire n°78e météorologie nationale e.c.m.-t/clim	AOC Corbieres	43.23	2.92	27	2	Not used to calculate the GDH-RCS	Only 2 data
		Sommieres	1885-1886	Formulaire n°78e météorologie nationale e.c.m.-t/clim	AOC Languedoc	43.78	4.08	39	2	Not used to calculate the GDH-RCS	Only 2 data.
		St Jean-du-Bruel (Aveyron)	1756 - 1763	(Le Roy Ladurie, 1967)	Near AOC Côtes du Millau	44.02	3.35	531	8
		Vias	1999-2003	Chambre d'Agriculture, Herault - Original data	AOC Languedoc	43.31	3.41	12	5	Roussanne
		Villevieille	1885-1889	Formulaire n°78e météorologie nationale e.c.m.-t/clim	AOC Languedoc	43.78	4.08	86	4	Not used to calculate the GDH-RCS	Only 4 data
Low Loire Valley	LLV	Anjou	1360 - 1701	(Le Mené, 1982) for (1360-1512) and (Lebrun, 1971)(after 1600)	AOC Anjou				186
		Château-du-Loir	1814 - 1839	(Angot, 1883)	AOC Coteaux du Loir	47.68	0.41	79	26
		Chinon 1	1847 - 1976	(Angot, 1883; Legrand, 1977)	AOC Chinon	47.15	0.22	31	129
		Chinon 2	1979 - 2006	Chambre d'Agriculture d'Indre et Loire - Original data	AOC Chinon	47.15	0.22	31	28	Cabernet Franc
		Chinon 3	1986 - 2006	Chambre d'Agriculture d'Indre et Loire - Original data	AOC Chinon	47.15	0.22	31	20	Chenin
		Saint-Denis-d'Anjou	1814 - 1838	(Angot, 1883)	Without AOC	47.78	-0.44	52	25
		Vendôme	1801 - 1879	(Angot, 1883))	AOC Coteaux du Vendômois	47.78	1.07	79	79
Luxembourg	Lux	Grand-Duché	1840 - 1949	(Lahr, 1950)	Vignoble du Luxembourg	49.67	6.13	236	107
Maritime alps	Mar	Moustiers	1549 - 1788	(Pichard, 1991)	AOC Coteaux de Pierrevert	43°50	6°13	658	130
		Riez	1555 - 1785	(Pichard, 1991)	AOC Coteaux de Pierrevert	43°49	6°05	530	139
		Valensole	1500 - 1796	(Pichard, 1991)	AOC Coteaux de Pierrevert	43°50	5°59	562	142
Northern Italy	NIt	Tirano	1623 - 1884	(Bonardi et al., 2009)		46.22	10.17	436	163
Northern Lorraine	NLo	Avrainville	1840 - 1879	(Angot, 1883)	AOC Cotes deToul	48.77	5.93	231	29
		Foug	1842 - 1879	(Angot, 1883)	AOC Cotes deToul	48.68	5.78	258	37
		Jouy-sous-les-Côtes	1840 - 1875	(Angot, 1883)	Without AOC	48.77	5.68	287	31
		Marainville-sur-Madon	1840 - 1879	(Angot, 1883)	Without AOC	48.38	6.17	263	40
		Sommerviller	1840 - 1879	(Angot, 1883)	Without AOC	48.62	6.37	212	40
		Toul	1752 - 1884	(Bonardi, 2007)	AOC Cotes deToul	48.68	5.88	211	127
		Verdun	1840 - 1879	(Angot, 1883)	Without AOC	49.15	5.38	198	40
		Villers	1840 - 1879	(Angot, 1883)	Without AOC	48.3	6.17	314	40
Northern Rhone valley	NRv	Ampuis	1964 - 2006	Pichat’s vineyard – original data	AOC Cote Rotie	45.48	4.8	153	43
		Tain - L'Hermitage	1796 - 1878	(Angot, 1883)	AOC Tain Hermitage	45.07	4.83	123	83
		Valence	1537; 1540	(Le Roy Ladurie, 1967)	AOC Saint Peray et Cornas	44.92	4.88	129	2
Savoie	Sav	Chignin	1713 - 1790	Archives of Chignin city – original data	AOC Combe de Savoie	45.52	6	401	76
		Montmelian	1713 - 1790	Archives of Montmelian city – original data	AOC Combe de Savoie	45.5	6.05	311	75
		Yenne	1833 - 1879	(Angot, 1883)	AOC Avant Pays Savoyard (Vignoble de Jongieux)	45.7	5.75	232	47
Spain	Spa	Haro 1	1893-1970	Tardaguila J. - original data	DO Rioja	42.57	2.83	483	72	Tempranillo
		Haro 2	1970-2007	Tardaguila J. and Vicente Elias, L. - original data	DO Rioja	42.57	2.83	483	38	Red varieties
		Haro 3	1970-2007	Tardaguila J. and Vicente Elias, L. - original data	DO Rioja	42.57	2.83	483	38	White varieties
		Valladolid	1499 - 1799	(Bennassar, 1999) and (Anes Alvarez de Castrillon, 1967)	D.O. Ribera del Duero and D.O. Rueda	41.65	4.72	701	239
Southern Lorraine (northern Franche-Comté)	SLo	Châtillon-sur-Saône	1760 - 1879	(Angot, 1883)	Without AOC	47.98	5.88	239	90
		Vesoul	1800 - 1879	(Angot, 1883)	Without AOC	47.62	6.15	227	79
Southern Rhone valley	SRv	Aubignan	1603 - 1749	(Le Roy Ladurie, 1967)	AOC Coteaux du Ventoux	44.1	5.02	73	13
		Avignon 1	1598 - 1822	(Le Roy Ladurie, 1967)	AOC Cotes du Rhone	43.95	4.8	32	16
		Avignon 2	1594	(Le Roy Ladurie, 1967)	AOC Cotes du Rhone	43.95	4.8	32	1
		Avignon 3	1703	(Le Roy Ladurie, 1967)	AOC Cotes du Rhone	43.95	4.8	32	1
		Avignon 4	1666 - 1675	(Le Roy Ladurie, 1967)	AOC Cotes du Rhone	43.95	4.8	32	5
		Baume	1743 - 1774	(Le Roy Ladurie, 1967)		43.5	5.8	-	7
		Bédarrides	1671 - 1861	(Le Roy Ladurie, 1967)	AOC Cotes du Rhone	44.03	4.88	30	39
		Bédoin	1720 - 1940	(Le Roy Ladurie, 1967) and multimedia library of Avignon (Chobaut’s collection, MS 5961, MS 6381)	AOC Côtes du Rhône	44.35	4.97	208	24
		Bénédictins de Ste Catherine d'Avignon	1496	(Le Roy Ladurie, 1967)	AOC Cotes du Rhone	43.95	4.8	32	1	Not used to calculate the GDH-RCS	Only 1 data.
		Bollène	1550 - 1944	(Le Roy Ladurie, 1967) and multimedia library of Avignon (Chobaut’s collection)	AOC Cotes du Rhone	44.27	4.73	55	23
		Cabrières	1562 - 1568	(Le Roy Ladurie, 1967)	AOC Costieres de Nimes ?	43.9	4.47	129	2	Not used to calculate the GDH-RCS	Only 2 data.
		Caderousse	1589 - 1837	(Le Roy Ladurie, 1967)	AOC Cotes du Rhone	44.1	4.75	28	44
		Caromb	1758; 1807; 1814	(Le Roy Ladurie, 1967)	AOC Coteaux du Ventoux	44.1	5.1	96	3
		Carpentras	1433 - 1846	(Le Roy Ladurie, 1967)	AOC Coteaux du Ventoux	44.05	5.05	92	44
		Caumont-sur-Durance	1532 - 1788	(Le Roy Ladurie, 1967)	AOC Cotes du Rhone	43.88	4.93	55	17
		Cavaillon 1	1541 - 1850 - 1940	(Le Roy Ladurie, 1967) and multimedia library of Avignon (Chobaut’s collection, MS 5961, MS 6381)	AOC Coteaux du Luberon	43.83	5.03	136	10
		Cavaillon 2	1845	(Le Roy Ladurie, 1967)	AOC Coteaux du Luberon	43.92	5.03	136	1	Not used to calculate the GDH-RCS	Only 1 data.
		Chartreuse de Bonpas à Caumont	1787 - 1788	(Le Roy Ladurie, 1967)	AOC Cotes du Rhone	43.92	4.92	48	2	Not used to calculate the GDH-RCS	Only 2 data
		Chateauneuf-de-Gadagne	1475 - 1859	(Le Roy Ladurie, 1967)	AOC Cotes du Rhone	43.92	4.97	47	36
		Châteauneuf-du-Pape 1	1577 - 1860	(Le Roy Ladurie, 1967) and multimedia library of Avignon (Chobaut’s collection, MS 5961, MS 6381)	AOC Chateauneuf de Papes	44.03	4.82	37	46
		Châteauneuf-du-Pape 2	1945 - 2005	Ganichot B., Inter-Rhone - original data	AOC Chateauneuf de Papes	44.03	4.82	37	61
		Chusclan	1641 - 1742	(Le Roy Ladurie, 1967)	AOC Cotes du Rhone	44.13	4.68	41	24
		Cordeliers d'Avignon	1458 - 1777	(Le Roy Ladurie, 1967)	AOC Cotes du Rhone	43.95	4.8	32	79
		Cours de Justice du Comtat Venaissin	1601 - 1696	(Le Roy Ladurie, 1967)		43.95	4.8	32	7
		Courthezon	1850 - 1862	(Le Roy Ladurie, 1967)	AOC Cotes du Rhone	44.08	4.88	41	4
		Couvent des Augustins, Pernes-les-Fontaines	1572- 1789	(Le Roy Ladurie, 1967)	AOC Coteaux du Ventoux	43.98	5.05	75	182
		Evéché, Avignon	1365 - 1367	(Le Roy Ladurie, 1967)					3	Muscat. Not used to calculate the GDH-RCS	Only 3 data. Not identified as an early variety and not considered as an important variety in the past. See Yiou et al., 2012.
		Gaujac	1931-1933	Formulaire n°78e météorologie nationale e.c.m.-t/clim	AOC Cotes du Rhone	44.07	4.57	131	3	Not used to calculate the GDH-RCS	Only 3 data
		Gigondas	1825 - 1943	(Le Roy Ladurie, 1967) and multimedia library of Avignon (Chobaut’s collection, MS 5961, MS 6381)	AOC Gigondas	44.15	4.7	259	6
		Jonquières	1804 - 1829	(Le Roy Ladurie, 1967)	AOC Cotes du Rhone	44.1		53	7
		Joucas	1578	(Le Roy Ladurie, 1967)	AOC Coteaux du Luberon	43.92	5.25	236	1
		Laudun	1726 - 1839	(Le Roy Ladurie, 1967)	AOC Cotes du Rhone	44.1	4.65	83	25
		Laval	1687; 1831	(Le Roy Ladurie, 1967)					2
		Le Thor 1	1534 - 1860	(Le Roy Ladurie, 1967)	AOC Coteaux du Luberon	43.92	4.98	51	47
		Le Thor 2	1589	(Le Roy Ladurie, 1967)	AOC Coteaux du Luberon	43.92	4.98	51	1	Muscat. Not used to calculate the GDH-RCS	Only 1 data.
		L'Isle-sur-le-Sorgue	1602 - 1869	(Le Roy Ladurie, 1967) and multimedia library of Avignon (Chobaut’s collection, MS 5961, MS 6381)	AOC Coteaux du Luberon	43.92	5.03	59	33
		Loriol-du Comtat	1854 - 1859	(Le Roy Ladurie, 1967)	AOC Coteaux du Ventoux	44.07	5	40	5
		Malaucène	1585 - 1787	(Le Roy Ladurie, 1967)	AOC Coteaux du Ventoux	44.17	5.13	369	58
		Mazan	1615 - 1863	(Le Roy Ladurie, 1967)	AOC Coteaux du Ventoux	44.05	5.12	139	8
		Mazan - Jacquet	1955 - 1983	Jacquet O.’s vineyard – Original data	AOC Coteaux du Ventoux	44.05	5.12	139	29	Grenache
		Mondragon	1825 - 1846	(Le Roy Ladurie, 1967)	AOC Cotes du Rhone	44.23	4.7	47	20
		Monteux	1589 - 1865	(Le Roy Ladurie, 1967)	AOC Coteaux du Ventoux	44.03	4.98	43	49
		Morières-les-Avignon 1	1598 - 1830	(Le Roy Ladurie, 1967)	AOC Cotes du Rhone	43.93	4.9	32	62
		Morières-les-Avignon 2	1666 - 1677	(Le Roy Ladurie, 1967)	AOC Cotes du Rhone	43.93	4.9	32	9
		Mormoiron	1838 - 1849	(Le Roy Ladurie, 1967)	AOC Coteaux du Ventoux	44.07	5.17	224	12
		Mornas	1719 - 1863	(Le Roy Ladurie, 1967)	AOC Cotes du Rhone	44.2	4.72	47	26
		Oppède-le-Vieux	1532 - 1535	(Le Roy Ladurie, 1967)	AOC Coteaux du Luberon	43.82	5.32	246	4	Not used to calculate the GDH-RCS	Only 4 data. No significant correlation with the other series of the region
		Orange	1527 - 1863	(Le Roy Ladurie, 1967)	AOC Cotes du Rhone	44.13	4.8	49	31
		Pernes-Les-Fontaines	1596 - 1941	(Le Roy Ladurie, 1967) and multimedia library of Avignon (Chobaut’s collection, MS 5961, MS 6381)	AOC Coteaux du Ventoux	43.98	5.05	75	71
		Piolenc	1780 - 1858	(Le Roy Ladurie, 1967)	AOC Cotes du Rhone	44.17	4.75	60	5
		Pont-Saint-Esprit	1929-1933	Formulaire n°78e météorologie nationale e.c.m.-t/clim	AOC Cotes du Rhone	44.25	4.63	47	3
		Puymeras	1604 - 1605	(Le Roy Ladurie, 1967)	AOC Côtes du Rhône	44.27	5.12	352	2
		Robion	1785; 1843	(Le Roy Ladurie, 1967)	AOC Coteaux du Luberon	43.83	5.17	133	2
		Saint-Didier-les-Bains	1940 -1942	Multimedia library of Avignon (Chobaut’s collection, MS 5961, MS 6381)	AOC Coteaux du Ventoux	44	5.1	170	3
		Saint-Saturnin-lez-Avignon	1736 - 1793	(Le Roy Ladurie, 1967) and multimedia library of Avignon (Chobaut’s collection, MS 5961, MS 6381)	AOC Cotes du Rhone	43.95	4.92	56	7
		Sarrians	1835 - 1940	(Le Roy Ladurie, 1967) and multimedia library of Avignon (Chobaut’s collection, MS 5961, MS 6381)	AOC Coteaux du Ventoux	44.08	4.97	40	12
		Saze	1349 - 1358	(Le Roy Ladurie, 1967)	AOC Cotes du Rhone	43.93	4.67	101	10	Not used to calculate the GDH-RCS	No significant correlations with the other series of the region
		Sérignan du Comtat	1826 - 1827 - 1940	(Le Roy Ladurie, 1967) and multimedia library of Avignon (Chobaut’s collection, MS 5961, MS 6381)	AOC Cotes du Rhone	44.18	4.83	73	3
		Sorgues	1838 - 1842	Multimedia library of Avignon (Chobaut’s collection, MS 5961, MS 6381)	AOC Cotes du Rhone	44	4.87	21	3	Not used to calculate the GDH-RCS	Only 3 data
		Ste-Cécile les Vignes	1857 - 1940	(Le Roy Ladurie, 1967) and multimedia library of Avignon (Chobaut’s collection, MS 5961, MS 6381)	AOC Cotes du Rhone	44.23	4.88	108	2	Not used to calculate the GDH-RCS	Only 2 data
		Tavel	1951 - 2006	Riou C., Institut Rhodanien - original data	AOC Tavel	44	4.68	106	56
		Vaison-la-Romaine	1774 - 1841 - 1941 -1943	(Le Roy Ladurie, 1967) and multimedia library of Avignon (Chobaut’s collection, MS 5961, MS 6381)	AOC Côtes du Rhône	44.23	5.07	215	10
		Valreas	1774 - 1861	(Le Roy Ladurie, 1967) and multimedia library of Avignon (Chobaut’s collection, MS 5961, MS 6381)	AOC Côtes du Rhône	44.38	4.98	226	37
		Vaucluse	1852, 1905-1909	Multimedia library of Avignon (Chobaut’s collection)	AOC Cotes du Rhone	43.95	4.8	32	6	Not used to calculate the GDH-RCS	No significant correlations with the other series of the region
		Vedène	1849	(Le Roy Ladurie, 1967)	AOC Cotes du Rhone	43.97	4.9	43	1	Not used to calculate the GDH-RCS	Only one data
		Verfeuil	1930-1933	Formulaire n°78e météorologie nationale e.c.m.-t/clim	AOC Cotes du Rhone	44.17	4.43	127	4	Not used to calculate the GDH-RCS	Only 4 datda and no significant correlations with the other series of the region
		Villes sur Auzon (Ville/Auzo)	1603 - 1785	(Le Roy Ladurie, 1967)	AOC Coteaux du Ventoux	44.05	5.23	308	27
		Visan 1	1644 - 1942	(Le Roy Ladurie, 1967) and multimedia library of Avignon (Chobaut’s collection, MS 5961, MS 6381)	AOC Cotes du Rhone	44.3	4.95	190	60
		Visan 2	1982 - 2005	Blanc M. –V.’s vineyard - original data	AOC Cotes du Rhone	44.3	4.95	190	25
Switzerland	Swi	Aubonne	1551 - 1977	(Angot, 1883) (for 1560 - 1868) and (Legrand, 1979) (for 1968 - 1977)	Vignoble de Vaud (La Côte de Nyon)	46.48	6.38	515	384
		Canton de Vaud	1975; 1984 - 2006	Tourist Information office of ‘Vevey’ city- Original data	Vignoble de Vaud (Lavaux)	46.46	6.84	421	23
		Genève 1	1560 - 1793	(Legrand, 1979)	Vignoble de Geneve	46.2	6.13	382	212
		Genève 2	1969 - 2005	Synthesis of the work group « Stratégie viticole 2 », Geneva	Vignoble de Geneve	46.22	6.15	383	34	source NI
		Lausanne	1480 - 1868	(Angot, 1883)	Vignoble de Vaud (Lavaux)	46.57	6.52	415	265
		Lavaux	1557 - 1866	(Angot, 1883)	Vignoble de Vaud (Lavaux)	46.5	6.75	815	229
		Le Crest - Jussy	1677 - 1879	(Angot, 1883)	Vignoble de Vaud (Lavaux)	46.2	6.13	382	93
		Morges	1825 - 1879	(Angot, 1883)	Vignoble de Vaud (La Côte de Nyon)	46.5	6.48	375	54
		Northern Switzerland - Meier	1480 - 2006	Meier et al. (2007)	Vignoble de Vaud et de Neuchatel	-	-	-	453	Composite series (original series not comunicated). Not used to calculate the GDH-RCS	Already a composite data series
		Pully	1925 - 2007	Station viticole fédérale, Agroscope de Changins - original data	Vignoble de Vaud (Le Chablais)	46.5	6.65	423	83	Chasselas
		Rivaz	1847 - 1879	(Angot, 1883)	Vignoble de Vaud (Lavaux)	46.47	6.77	456	33
		Rolle	1803 - 1879	(Angot, 1883)	Vignoble de Vaud (La Côte de Nyon)	46.45	6.33	382	70
		Thonon 1	1643 - 1821	Archives of Thonon city - original data	AOC Vignoble de Ripaille	46.37	6.47	410	129	White varieties
		Thonon 2	1643 - 1821	Archives of Thonon city - original data	AOC Vignoble de Ripaille	46.37	6.47	410	114	Red varieties. Not used to calculate the GDH-RCS	Only the GHd of white varieties were used for the calculation of the GHD-RCS. See Yiou et al., 2012 for information on varieties
		Vevey	1801 - 1979	(Angot, 1883) (1801 - 1879) and (Legrand, 1979) for (1868-1979)	Vignoble de Vaud (Lavaux)	46.45	6.83	382	178
		Veytaux	1742 - 1866	(Angot, 1883)	Vignoble de Vaud (Lavaux)	46.42	6.92	430	110
		Villeneuve	1859 - 1879	(Angot, 1883)	Vignoble de Vaud (Le Chablais)	46.38	6.92	376	21
Various South-East	VSE	Aigaliers	1886-1933	Formulaire n°78e météorologie nationale e.c.m.-t/clim	Without AOC	44.06	4.32	200	9	Theses series do not make an homogenous group but they do not belong to the other identified groups either
		Alzon	1887	Formulaire n°78e météorologie nationale e.c.m.-t/clim	Without AOC	43.96	3.43	613	1
		Anduze	1885	Formulaire n°78e météorologie nationale e.c.m.-t/clim	Without AOC	44.05	3.98	143	1
		Axat	1931	Formulaire n°78e météorologie nationale e.c.m.-t/clim	Without AOC	42.8	2.23	415	1
		Bagard	1886	Formulaire n°78e météorologie nationale e.c.m.-t/clim	Without AOC	44.07	4.05	173	1
		Bez-et-Esparon	1884	Formulaire n°78e météorologie nationale e.c.m.-t/clim	Without AOC	43.97	3.53	314	1
		Bram	1914	Formulaire n°78e météorologie nationale e.c.m.-t/clim	Without AOC	43.23	2.1	134	1
		Cailhau	1931-1932	Formulaire n°78e météorologie nationale e.c.m.-t/clim	AOC Malèpere	43.14	2.13	239	2
		Castellet	1543 - 1671	(Pichard, 1991)	AOC Luberon	43.83	5.47	434	18
		Castelnaudary	1840-1897	Formulaire n°78e météorologie nationale e.c.m.-t/clim	Without AOC	43.32	1.95	192	33
		Chalabre	1850-1880	Formulaire n°78e météorologie nationale e.c.m.-t/clim	Without AOC	42.98	2	393	31
		Chartrosse de Valbonne	1926-1933	Formulaire n°78e météorologie nationale e.c.m.-t/clim	AOC Côtes du Rhône	44.23	4.55	197	4
		Concoules	1930-1933	Formulaire n°78e météorologie nationale e.c.m.-t/clim	Without AOC	44.37	3.93	654	4
		Corconne	1917-1932	Formulaire n°78e météorologie nationale e.c.m.-t/clim	AOC Languedoc	43.87	3.93	141	4
		Couiza	1864-1933	Formulaire n°78e météorologie nationale e.c.m.-t/clim	AOC Languedoc	42.93	2.25	271	11
		Gap	1599 - 1754	(Le Roy Ladurie, 1967)	Without AOC	44.55	6.07	730	36
		Génolhac	1917-1933	Formulaire n°78e météorologie nationale e.c.m.-t/clim	Without AOC	44.35	3.93	495	7
		Lasborde	1905-1915	Formulaire n°78e météorologie nationale e.c.m.-t/clim	Without AOC	43.28	2.03	147	3
		Lussan	1884-1888	Formulaire n°78e météorologie nationale e.c.m.-t/clim	Without AOC	44.15	4.35	297	4
		Mas Cabardes	1840-1914	Formulaire n°78e météorologie nationale e.c.m.-t/clim	Without AOC	43.37	2.35	346	42
		Quissac	1885	Formulaire n°78e météorologie nationale e.c.m.-t/clim	Without AOC	43.9	4	86	1
		Rabassié	1933	Formulaire n°78e météorologie nationale e.c.m.-t/clim	AOC Languedoc	43.05	2.33	311	1
		Rodome	1907	Formulaire n°78e météorologie nationale e.c.m.-t/clim	Without AOC	42.78	2.07	921	1
		Saint André de Valborgne	1885	Formulaire n°78e météorologie nationale e.c.m.-t/clim	Without AOC	44.15	3.68	486	1
		Saint Chaptes	1887-1888	Formulaire n°78e météorologie nationale e.c.m.-t/clim	Without AOC	43.97	4.27	73	2
		Saint Saveur - Camprieu	1925	Formulaire n°78e météorologie nationale e.c.m.-t/clim	Without AOC	44.1	3.45	952	1
		Saint-Quentin-La-Poterie	1932	Formulaire n°78e météorologie nationale e.c.m.-t/clim	Without AOC	44.03	4.43	129	1
		Saissac	1931	Formulaire n°78e météorologie nationale e.c.m.-t/clim	Without AOC	43.35	2.17	512	1
		Sault	1852	(Le Roy Ladurie, 1967)	Without AOC	44.8	5.4	737	1
		Soulatgé	1905-1909	Formulaire n°78e météorologie nationale e.c.m.-t/clim	Without AOC	43.8	2.15	238	4
		Vallabrix	1931	Formulaire n°78e météorologie nationale e.c.m.-t/clim	Without AOC	43.83	5.47	434	1
		Vers-Pont-du-Gard	1916-1932	Formulaire n°78e météorologie nationale e.c.m.-t/clim	Without AOC	43.97	4.52	56	6
		Villepinte	1902-1915	Formulaire n°78e météorologie nationale e.c.m.-t/clim	Without AOC	43.28	2.08	159	5
Vendée - Poitou Charente	VPC	Airvault	1823 - 1866	(Angot, 1883)	Vins du Thouarsais	46.82	-0.13	108	43
		Chizé	1816 - 1863	(Angot, 1883)	Without AOC	46.1	-0.33	47	47
		Couture-d'Argenson	1831 - 1879	(Angot, 1883)	Without AOC	45.98	-0.08	90	49	Not used to calculate the GDH-RCS	No significant correaltions with the other series of the region
		Nantes	1600-1630	Unknown source	IGP Loire Atlantique	47.21	-1.55	24	44	Not used to calculate the GDH-RCS	No significant correaltions with the other series of the region
		Pamproux	1819 - 1865	(Angot, 1883)	Without AOC	46.38	-0.05	89	44
		Talmont Saint Hilaire	1800 - 1877	(Angot, 1883)	AOC Fiefs Vendéens	46.45	-1.6	12	68
											It was not possible to calculate relationship with other series.

## Sheet: S2. GHD-RCS
GHD-RCS : dates in number of days after August 31.
	Alsace	Auvergne	Auxerre-Avalon	Beaujolais and Maconnais	Bordeaux	Burgundy	Champagne 1	Champagne 2	Gaillac- South-West	Germany	High Loire Valley	Ile de France	Jura	Languedoc	Low Loire Valley	Luxembourg	Maritime alps	Northern Italy	Northern Lorraine	Northern Rhone valley	Savoie	Spain	Southern Lorraine	Southern Rhone valley	Switzerland (Leman Lake)	Various South-East	Vendée - Poitou Charente
Abb.	Als	Auv	Aux	Bea	Bor	Bur	Cha1	Cha2	Gai	Ger	HLV	IdF	Jur	Lan	LLV	Lux	Mar	NIt	NLo	NRv	Sav	Spa	SLo	SRv	Swi	VSE	VPC
1354						15.2727
1355						13.3771
1356
1357						18.2727
1358
1359
1360
1361
1362
1363
1364
1365
1366
1367
1368
1369
1370
1371
1372						26.5253
1373						18.1296
1374						27.2733
1375						19.5253
1376						22.7778
1377
1378						22.8771
1379						22.2727
1380						19.7689
1381						21.2727
1382						14.3655
1383						4.77778
1384						6.27273
1385						9.45833
1386						18.1364
1387						19.6364
1388						26.1181
1389						24.6364
1390						14.6252
1391						14.1252
1392						37.8771
1393						1.27273
1394						31
1395
1396
1397						12
1398						27
1399						26
1400						10.4815
1401						19.4583
1402						15.3594
1403						18.7292
1404						29.5208
1405						26.2727
1406						24.0208
1407						26.4815
1408						27.7778
1409						17.7778
1410						15.4583
1411						36.4583
1412						17.2727
1413						14
1414						30.1136
1415						21.4815
1416						24.8655
1417						21.1364
1418						9.48148
1419						17.95
1420						-2.63447
1421						23.2727
1422						10.3771
1423						25.95
1424						11.7689
1425						16
1426						14
1427						25
1428						35
1429						24
1430						15
1431						19
1432
1433						13																		8.63158
1434						1
1435						25
1436						29																		21.6316
1437																								17.6316
1438																								15.6316
1439
1440						28																		8.63158
1441						18																		16.6316
1442																								10.6316
1443						26																		13.6316
1444																								16.6316
1445
1446
1447
1448						30							63.9762
1449					49	42							37.9762
1450						25
1451					45	39
1452						24							22.9762
1453						37							44.9762
1454						34
1455						31
1456						33
1457						14
1458						18																		8.63158
1459						35
1460
1461					27	16
1462
1463						35
1464						14
1465					59	41							47.9762
1466						27
1467						27							45.9762											15
1468						32
1469						20																		18
1470						37																		17
1471						11
1472						23
1473						-2
1474					45	39
1475						31																		13.0526
1476					36	28																		7.81579
1477						41
1478					25	19						23.3333
1479						16
1480						39																			48
1481						47
1482					41	16
1483					26	15			18
1484					14	21						37.3333												7.63158
1485					53	44			50			15.0333
1486						21						15.3333
1487						23						25.3333
1488						43						45.2333
1489						32						19.3333
1490						26						24.3333
1491						46						49.3333
1492									25				23.9762
1493						36			29			31.3333	42.9762
1494						19							23.9762
1495						14
1496						41						36.1333													44
1497						40						32.6333													23
1498						27						19.3333													34
1499						29			34													49			35
1500						14											14					40
1501						19			16													37
1502						29						15.3958					12								33
1503						28			27			6.39583										39			17
1504						15							20.9762									36			27
1505						43						43.0333													46
1506						28			36			17.3958										48			41
1507						16						9.39583	44.9762												26
1508						30						28.3958	46									53
1509						20						20.3958													35
1510						30						27.5333										45			35
1511						44						35.5333										35			51
1512						24			25			16.3646										45			33
1513												19.3646										57			35
1514						33						11.3646													36
1515						35						13.3958													46
1516						12						3.39583					12
1517						26			3								17					45			24
1518						22						12.3646					24								35
1519						40											18					47			41
1520												10.3333					23								26
1521												21.3333													26
1522						36						26.3333													41
1523						26						24.3646													35
1524												11.3958	25	3.41
1525						21						17.8646	34.4881
1526												23.403	39.9881												33
1527						43						38.8646	56									61		40.8421
1528						35						22.8646	52									53			39
1529												40.3958	60.4881									45			50
1530						15						11.3958	25												50
1531												25.3958	36.4881												35
1532					27	20						22.3958	34											2.03846
1533					35	36						21.3646	38.4881												39
1534					24	20						14.3958	25											2.91176
1535						30						26.3646	47.4881
1536						8							32.9881	20.05
1537						40						27.3333	45.9881							20				18.0385
1538						12						5.36458	26.9881
1539						26						26.3333	37.4881
1540						3						6.39583	8.9881							11		37
1541												22.3646	51.4881									53		14.5714
1542												43.8646	64.4881									49
1543												21.3333	51.4881									48				22
1544												27.3333	41
1545						11						12.4103	19.9881									31
1546						23						13.3333	33.9762									32
1547						31						21.3874														19
1548						29						30.1333	37.9762													22
1549						34			21			22.349	35.9762				25							11	21	23
1550						37			10			20.3333	48.9762											13.3	39
1551						26						19.7424	35.9762									47		11.6316	34.8195
1552						13						14.8718	28.9762									45		9	27.3195
1553						35			28			27.4103	45.9762				22					51		16.3	38.3195
1554												14.849	31.9762	32.2								41		5	30.8195
1555						40						47.5535	59.9762				26.5					49		10	45.3195
1556						5							14.9762				7					41		4.81579	6.63902
1557						33						16.0379	48.9762				27					70		16	37
1558						32						11.3646					34.5					52		13	36
1559						5						11.4103	24.9762	21.2			25							0	17
1560						36						26.3333	45.4881									54		10	42.639
1561						14						3.33333	36.9881				29					41		2	32.639
1562													42.4881									47		1	33.2761
1563						30			16				48.9762												44
1564						46						34.3333	45.9762									42			34.6381
1565													44.9762				35					45			43.2761
1566						38							40				23					42			29
1567						23						13.849	33.9762									39			40.9576
1568						30						13.8874	49				34					48			46.639
1569						26						22.4103	48.9881				33								49.9576
1570						35						27.4103	58.4881												52.639
1571												17.7424	24.9881				17							3.63158	27.639
1572						19						18.7424	28.4881				30					52		14	32.639
1573						40						35.3646	54.9762				42					49		19	53.6381
1574						29						47.7424	36.4881									45		10	34.6381
1575						26						20.1333	41.9762				28					39		8	38
1576						36						26.3646	53.4881									55		16	46.639
1577						33						27.3333	49.9762				31.5					47		10.2778	43
1578						21						13.1718	40.9762				30					32		5	43.6381
1579						39						35.6718	60.9762	25.41								38		13	52.639
1580						30			19			25.0379	44.9762				22					43			32.639
1581						33						56.3646	50.9762				31					35		14	40.4576
1582						28						32.349	42.9881				31					44		15	26.7039
1583						12						13.0379	33.9881	20.41								31		5	25.3195
1584						25						26.3718	39.9881				38					33		10	36.9576
1585						34						47.1333	45.9881	23.41			45					53		15.6343	44.639
1586					27	32						44.8718	48.9762									35		14.0901	36
1587					32	42						52.4103	60.4881				52					30		22	40.5225
1588					24	24						33.8718	41.9881	15.17			36					33		9	40
1589						25			31			30.849	39.9881				36					39		9.96815	30.7688
1590						13						22.5535	26.4881									43		14.6343	20
1591					33.5	32						33.8718	44.9881				36					44		12.9297	42.639
1592					26	32						36.3718	51.4881									42		11	46.0225
1593					33.5	32						37.6333	50.4881									36		9.13426	44.639
1594					47.75	30							46.4881				47					37		9	48.3844
1595					29.5	25			22			41.749	47.9762				49					32		15.8158	42.8844
1596					36.25	33						36.7333	52.9762				52					52		15.2685	47.639
1597					41.5	43						54.3646	60.9881				51					45		18.5639	45.639
1598					31.5	23			31			39.3646	47.9881									35		14.8242	35.639
1599					20.5	11						6.33333	27.9881									31		0.134259	24.0225	20
1600					50.5	43					49	50.3333	62.4881									32		16.0769	48.639	40	26
1601					35.5	38						31.3333	56.4881	34.41								52		30.2	45.7688		21
1602					23.5	23							38.9881				31.5					35		12.4444	27.5225		26
1603					20.75	13						35.3333	26.9881				31					31		4.62037	17.639	24	22
1604						20						19.3333	40.9881	10.84			37.5					35		11.2407	29		16
1605					33.5	20						39.3333	41.9762	16.84			40							15.2685	26.7688		20
1606					45.5	36							54.4881				46					28		15.6343	49.639		39
1607					29.5	24							38.9881				34					33		0.686891	34.5225	39	20
1608					41.5	31							54.9881	16.17			45					40		16.1204	43.639		18
1609					21.5	28						18.3333	43.9881	23			49					46		14.1053	38.639	41	17
1610					27.25	20							35.9762	13.92			34					35		12.5526	22.639	34	-1
1611					19	14				45			31.9881				30					37		11.2407	19.639		40
1612					32	31			31	50	38	31.3333	48.4881	12.84			41					40		18.2407	36.7688		32
1613					34	25						22.1667	43.4881	19.81			47					38		18.4297	38.639	40	31
1614						36				55		26.1667	61.4881	27.31			50					30		18.8594	43.639		36
1615					27.5	22				31		27.3333	32.9762	16			42					22		13.6071	28.0225	35	28
1616					29.5	12				17			18.4881	9.92			40					24		5.07692	16.639		8
1617					24.5	33						33.3333	48.4881	15.84			46					42		14.6204	54.2761	40	22
1618					36	36				53		30.6667	54.9762	24.84								38		23.2407	46.639	42	18
1619						26					35	23.3333	45.9762	13.84			44					42		11.5714	29.6381	36	23
1620					38	28				50	38		44	16.88			42					39		17.25	42	35	25
1621					45	46				53	53		63.9762	22.02			55.5					49		24.5763	63.4576	38	21
1622						24				41	33		44.9762				50					26		15.1204	40.9576	31	14
1623					25	15				37	32		38.9881	20.11			46	43				39		16.9559	34.4576	27	-1
1624						14				35	16	16	29.4881	15.45			37					30		14.0901	23.639	29	0
1625						33					41		49.9762	22.29			43					38		19.9118	40.639		26
1626					39.5	27				43	42		42.9881	19.87								49		14.2407	32.639	52	8
1627						44				58	51		68.9881	33.5			56	54				49		31.0385	51.639		16
1628						44.1765				61	24		63.9881	31.62			42.5	55				39		32.2407	68.4576	53	8
1629					30	27				29	31			30.29			45					52		20.2407	21.639	40	4
1630						20				35			34	22.12			37							17.0769	30.639		43
1631						20				37			38.9881	17.5			39							13.0385	26.7039	29
1632						34				53			49	31.17			48							21.1204	48.639
1633					36.5	37			38				52.4881	26.79			54					56		19.6204	40.7039	47
1634						33				54				22.74			46	42				39		20	32.639	40
1635						25				53			43.9762	16.62			31					31		14.9595	35.639	24
1636						4				34				15.29			43					31		11.1204	24.2761
1637						3				26	9			11.84			21					35		3.03846	27.5225
1638						10							19.9881	17.79			38					43		6	29.639
1639						20							44.9762	16.84			34.5					35		15	35.639
1640					34.5	31			36				53.9762	18.29			46					45		13	37.7039
1641						33			37.5	45			48.9881	21.84			51	55				37		18.2105	42.7688	42
1642						33			50				49.4881	31.84			54.5					38		32	46.639	46
1643						31				45			53	24.79			49.5					40		19	48.5417
1644						15				55		18	27	20.42			43.5	55				40		18.2278	30.0225
1645						11			26	36			35	15.74								41		8.21053	29.5417
1646						17			32	40			40.9881	14.74			40.5					24		13	41.7688	27
1647						18				45	30		40	19.29			44					37		16.1343	41.4576	34
1648					25	31				47	38		45	27.79			42.5					44		23.749	45.5225
1649						38			44	46			52.9881	29.79			50					38		22.2105	55.4444	44
1650					36.5				42	41			48.3187	19.74			36	40				36		15.7105	49.5225	30
1651						22			23			24	39.4881	15.29			39					32		5.21053	33.4576
1652						20			44	36			43.4881	24.74								37		20	37.639	46
1653					25.5	11			31		43		32.9762	21.84			31.5					33		13	31.639	22
1654						32			37	47	45		48.6374	25.92			50					44		16.2105	47.7688
1655						23				13	34		39.9881	16.29								38		20.2278	38.7688
1656						26			31	47	32	27	44.8068				39					41		14.4297	38.3844
1657						22				36	24			25.4			46					35		15	33.7688
1658						29			25		37	37	44	29.95			40					48			43.9576
1659						10			23			15	28.4881	15			36					38		5.14021	26
1660						8			26				28.6374	14.53			30					34			26.2039	23
1661						12				34		26	27.9881	21.92			33					42		9	38.2039	26
1662					19.5	22				44			43	21.03			46					39		14.4211	45.4576
1663					28.5	38							42	31.9			46.5					45		25.4556	50.2039
1664						19				40			40	22.74			40					35		15	37.0225
1665					21.5	15				37		22	39	23.4			49								34.2761
1666					12.75	10				45			30.8187	24.79			34							17.0333	36.7688	31
1667						28			43	30	33	33	48.6374	34.05			54							25.6667	51.3844	38
1668						19			41	39			42.8068	20.92			38							15.5333	34.639	27
1669						13				33		19	26.9762	20.37			40					33		16.4556	37.7688
1670						22			33	33			38.3068	17.05			37					41		13	42.3603
1671						16				33			32.6374	24.53			49					36		17.2278	38.7039	24
1672						28			40	45			48.6374	25.37			47					33		21.7	39.7688
1673						35			49		40	34	65.8068	36.84			53					44		31.2	56.639
1674						20					33	31	40.9762	24.84			44					40		20	47.7688	39
1675					60	44			58.5	57	55	53	70	41.74								56		41	64.2039	55
1676						10			23	26	18	7	25.3187	26.92			42					35		23.4	28.2761
1677						27			31	43	30	30	44.6374	24.84			41					38		24.9278	47.7688	40
1678						20			32		29		37.6374	29.95			40					54		23.1985	36.8844
1679						26			30	37	32	34	41.6374	27.45			46					43		26	34.2761
1680						10			28	35	23	14	30.6374	22.84			37					46		17.9263	40.7688	34
1681						9				38	29	20	28.9881	22.05			43					37		18.1	38.7688
1682						28				44			50.9762	30.31			43					44		25.4556	57.639
1683						13			36	35		20	36	23.45			34					37		22.4556	41.5417
1684						4				23		16	22.9881	23.45			28.5					45		19.9118	27.7688
1685						12				46		22	35	21.79			39					40		19.6837	45.0225
1686						4			29	26			20.9762	24.62			28					35		18.9559	33.5225
1687						29				42			45	35.84			48					40		25	41.6381
1688						27				39		26	43.4881	36.05			41					51		31.6837	45.7222
1689						29.3844						30	43.9881	30.41			43					36		26	50.639
1690						13.8844				44		25	49	28.95			47.5	46				52		32.0559	46.7222
1691					21	24.3844			43	42		20	38.9881	23.84			34					38		21.9118	42.1066
1692						35.3844				48		47	59	33.84			51	57				44		29.1837	66.2222
1693						29.3844				38		29	42				52.5					57		26.4556	42.3195
1694						26.3844				38		47	33.9881	24.74			41					43		19.4383	41
1695						22.3844				46		46	53.4881	36.79			52.5	55				51		30.9118	60.8603
1696					34.5	16.8844				43		39	44.4881	28.84			58					41		25.1985	47.2761
1697					19.5	26.3844				38			39.9881	26.79			51					55		24.4556	45.1381
1698					46.5	38.8844				25		49	62.4881	42.74			61.5					52		38	67.639
1699					25.5	17.3844				44		27	47.4881	33.84			43.5					34		29.4559	47.3603
1700	42.8906					31.5914				41		42	54.6374	32			54	42				49		30.4559	58
1701	35.8906					25.6364				40		32	43	44.84			47					54		34	50.3195
1702	45.029					19.6364				43		34	55.4881	38.02			48	48				48		29.4556	57
1703	49.4453					25.5914			40	42		42	45.9881	28.84			38	47				41		27	57.4444
1704	30.4453					15				30		22	32	22.31			36							22	34.2222
1705	46.9453					28.5914				49		35	46.9762	33.84			49							31.7278	55.1381
1706	38.6957					7.02081				40		22	23.9881	18.29			29	42						18	37.639
1707	44					22.5914				40		30	42	39.2			36.5	47						28	50.1066
1708	32					24.6364				39		34	41.6374	29.87			42.5							28	45.3603
1709	29.8906					31.5914				37			38.6374	36.62			44							31	48
1710	37.9453					20.6364				36		31	37.3068	26.87			34							18.5102	43.1381
1711	39.4453					26.6364				32		31.0286	44.6374	33.74			48.5					43		20.7278	56
1712	37.9453					28.1364				30			42	32.53			41					44		18.7278	47.639
1713	44.8906					34.5208				47		42	50	38.77			40.5				54.5	52		32	59.7688
1714	47.8906					29.5914				42		27	47.9881	38.74			54				50	58		29.7278	57.7688	42
1715	36.4453					27.6364				38		35	41	28.9			37				43			21.7278	44.1381
1716	44.8906					32.0208				54			48.6374	38.79			47	49			55	36		33.7278	62
1717	42					25.0208				32		33	40.4881	34.81			48	48			39	37		27.7278	51
1718	21					3.3395				22		15	17.9881	19			26	36			20	23		10.7278	36.3844
1719	40.6957					-0.479192				29		12	12.9881	21.03			29	46			33	30		16.249	49
1720	40.6957					28.2727				33		29	41.9881	43.9			33.5				52	45		32	56.5225
1721	44.4453					32.0208				40		31	45	45.44			50	35			50.5	45		30.9885	60.7039	45
1722	37					23.2727				38		29.5286	36.6374	32.4			37	39			40	36		27.58	45.2222
1723	38.4453					17.6364				39		11.5286	35.9762	30.84			41				48	34		27.58	46
1724	39.6957					22.3529				30		15.5286	34.6374	17.03			25	38			44.5	29		19.5178	47.7688
1725	53.9453					42.0208				57		51.5286	54.9881	41.79			48				56	49		32	64.7688
1726	32					11.0556				48		6.02857	22.4881	24.05			37	37			34	41		30.0417	32
1727	35					11.2727			25	25		11.0286	24.9881	23.53			36	45			33	41		18.79	47
1728	40					15.2727			30	30		17.0286	27	22.05			30.5				35.5	41		16.9263	46.7688
1729	35.8906					31.5914				40		31.0286	41.9762	36.79			36	47			45	44		28.4961	46.2761
1730	45.8906					29.2727				44		35.5286	48.4881	35.4			46				50	44		26.1985	55.4444
1731	46.9453					22.0556				40		17.0286	35.4881	41.05			45				43	43		28.0769	52.7688
1732	36.9453					20.5914				44		27.0286	40	42.92			44.5				48.5	52		29.58	50.2761
1733	43.4453				22	28				31		19.0286	41.9762	34.05			45.5	45			49.5	43		30.625	50.6381
1734	37.6957					17.3529				39		16.5286	31	13.84			29.5	34				33		13.5952	47.2761
1735	47.8906				42	39.0556				41		40.5286	49	39.03			48	46			52	53		33.0417	54.639
1736	41.6957				18	20.0556				34		26.5286	33	33			48.5	46			43	43		23.0417	49.639
1737	34.6957				15	19.3529				36		20.0286	32.9881	27.05			44	51			40.5	51		23.0417	45.7222
1738	35				30	31.2727				37		31.5286	40.9881	39.79			50	32			48	42		30.125	44
1739	33.6957					26.2042				36		30	43.9881	25.92			40				40	55		29.0476	46.2222	35
1740	49					49.1364				44		43.7297	52.9881	43.15			60				54			40.6985	65.2222
1741	45.9453				14	27.2727			26	44		22.3462	37.8068	25.15			35	48			46.5	33			51.2761
1742	52.9453					33.0208				49		30.3462	49.4881	33.2			40				38			27.3393	61.4576
1743	45.4453					27.0208				40		31.8462	42.6374	47.15			54	51			49.5	49		35.6429	61.639	44
1744	47.4453					32.0208			39	40		32.4595	47	39.41			53.5	45			50.5			35.9485	51.2222
1745	47.8906					30.1364				30		40.3462	40.6374	34.4			46	48			45	38		22.3971	55.5318
1746					30	27.8844				37		28	35	39.57			49	46			43	48		33	45.8354
1747	42.4453				26	33.3395				35		29.6923	43.3187	41.08			44	46			45	59		24	45.3354
1748	37.9453					27.0208			34	33		27.4595	42.8187	40.15			46	47			45.5	40		29.25	51.9576	44
1749	40.4453				31	30.3395				40		24.6923	38.8187	39.15			53				46.5	47		35	49.7222
1750	44				25	25.5208				39		25.4595	38.9762	37			49	46			46.5	44		26.5	49
1751	50.9453		43		36	37.0208				46		38	56.3068	36.07			51.5	51			51.5	44		30	58.639	41
1752	48.9453		39		33.5	30.0208				43		32.4595	52.6374	34.61			49	48	45		45	37		28	55.4444
1753	40		33		27.75	21.0208				38		21.4595	36.9762	32.2			45	47	36		49.5	33		30	49
1754	47		44		43.375	32.0208				40		34.4595	45.6374	31.08			44	51	46		48.5	40		29	52.2222	43
1755	37.9453		24		25.75	18.0208				36		15.6923	34.9762	33.57			47	45	38		48	45		28	51.1066
1756	48.9453		43		37	35.3395			38	41		38.4595	50	39.1			49.5	51	53		46	54		34	58.2222
1757	45.8906		33		31	27.3844				35		30.4595	37	34.22			47	47	33		44.5	43		31.5556	52.7688
1758	48		27		39	26.3395				42		22.4595	32	42.47			50.5	51	37		44.5	49		32.1343	55.639
1759	38.3253		31		23	25.3395				36		24	38	34.2			46.5		36		39.5			31.7551	38.6381
1760	38.76		29		20	17.0208				34		23.7297	28.9762	34.25			38.5	47	34		40.5	48	36	29	38.639
1761	37.38		28		20	16.0208				32		23	34.9762	38.11			47.5	49	35		46	42	24	29.6985	39.639
1762	32.88		20		18	17.0208				30		13	30.3068	36.41			41	36	33			35	30	27.5714	38
1763	45.8253		37		34	37.0208				47		37.4595	47	34.41			47	49	47		45	48		29.2551	56.2222
1764	38.38		33		24	14.0208			27	35		28.4595	30.9881	34.15			45	39	33		43.5	29	24	29.5102	48
1765	45.76		37		32	25.5914			40	42		23	47.7692	39.04			51	51	46		49	44	46	31	53.4576
1766	45.88		43		35	28.6364			39	39		33.4595	36.9881	37.28			45	45	43		42	42	37	29.5714	47.639
1767	53.3253		56		32.5	37.0208				54		49	53.2033	34.43			49	49			50	35		31.5556	57.9576
1768	45.8906		3		27	29.0208				45		35	46.8068	37.6			47	50	48		45	38		29.9118	51.3195
1769	41.38		39		28	29.0208				40		22	46.9881	42.2			46	53	44		48.5	36	40	36.2337	52.7222
1770	51		47		42	38.5208				47.5		42.4595	58.7033	43.1			59	53	50		56	50	59	39.2551	58.0318
1771	42.8906		39		25	27.5208				39.5		34.6923	41.8068	38.1			51	51	38		42	42	44	35.5714	44.639
1772	39		35		22	26.0208			28	43		28.6923	40.8727	29.41			49	49	43		40.5		43	27.6429	45.7222
1773	50.76		37		36.5	29.0208			37	49		41	48.8068	43.1			58	51	44		49.5	40	51	40.9297	59
1774	41.9453		33		28	24.0208			33	39.5		34.7297	37.3068	36.77			54		38		45	46	41	31.9118	41.639
1775	41.76		34		25	27.0208			32	41.5		23.7297	40.3846	35.79			49	49	40		47.5	42	40	31.0192	50.639
1776	47		44		33	31.5208			40	45.5		37.4595	45.9762	37.48			52	51	46		49		44	30.9319	47
1777	51.8906		46		38	32.5208			43	51		40.4595	44.9881	36.2			43	52	48		48		50	33.7337	50.8195
1778	44		35		29	25.3529			31	38.5		25.4595	34.9762	31.2			47		39		47		38	27	40.2761
1779	43.38		27		27	24.6364			30	36.5		24.4595	26.4881	34.3			43.5	48	37		43.5	41	30	28.58	42.8603
1780	42.38		32		26	20.5914			25	39.5		25	31.9762	30.41			42				44.5		29	30.5635	33.8603
1781	33		24		21	12.0208			20	29.5		10	23.9762	30.98			41.5	34	26		33		26	26.9559	31.3354
1782	51.76		44		27	32.0208			26	45.5		37	36.9762	36.1			44	51	49		49	46	54	35.0051	47.9734
1783	38		29		19	20.1364			25	35.5		15.2297	30.9762	35.08			51.5	46	34		45	45		31.0192	41.2761
1784	32.88		20		20	19.3529				37		13	32	30.15			42		36		40	42		24.5102	38.2222
1785	50.88		33		15	24.3529				53		20.7297	47	37			50	57	48		45.5			36	53.6381
1786	47.38		46		22	27.7689				48		28.7297	46	31.79			48	52	44		44	41	41	35.5	49.3195
1787	49.76		45		34	35.0208			38	49		40	49.6374	39.54			50	45	52		50	46	47	41.5	50.8195
1788	31.76		22		11.5	18.6364				32.5		15	29.6374	27.08			45	46	19		40.5	35		23.5102	32.6381
1789			42		37	38.1364			36	45.5		36.6923	41.8187	40.79			52	45	50		47.5	43	49	37.2551	52.254
1790			37		23	28.7689				43.5		29	37.9762	40.08				51			49	43	38	38.0278	48.639
1791			33		26	20.3844				42		26.6923	25.4881	22.78			30	49				43	26		37
1792			38		28	34.3844				46.5		36.7297	41.3187				47	34				39	46	30.7778	42.639
1793			37			24.5208				45.5		30	39.3187	38.15				37	37			38	25	37.5278	32.8195
1794			15			15.5914				25.5		11	22.8068	28.15				49	30			45	23	36.3304	29.6707
1795			35		26.2722	28.4551				46		32.4595	32.4881	24.15				47	43			43		31.5556	35.254
1796			40		31.2722	37.5914				47.5		33.7297	47	34.15			42	46	45	30		41			47.639
1797			39		29.7722	41.3395				40		28.6923	36	29.15				47	37	29		44	35		36
1798			24		26.7722	17.6364				40		14.4595	27.6374	32.15				51	30	21		39			36.0636
1799		46.6003			27.7722	41.5208	30.4752			52		44.4595	57.6374	44.15				50	56	41		44		26.6304	58
1800		39.3662	32		23.7785	26.7689	30.1667			33		26.4595	30.6374	34.15				45	35	30			28	18.6304	32.7688		12
1801		35.3662	35		14.3418	29.3395	21.7838			43.5	30	28.4595	37.3187		37.1212			42	43	18			35	22.6304	34.639		18
1802		33.1321	23		22	26.3395	27.7838			48	17	22.6923	27.3187		40.1212			41	28	18			27.9139	26.6304	31.8844		17
1803	49.029		33		25.2025	30.3395	20.5833			53	25	29	26		44.1212			49	35	24			26.9917		44.503		18
1804	48.029	40.6003	31		14.2152	30.5208	25.9342			41	33	27	45.3187		37.1212			47	35	33			24.9833	32.5102	40.3195		25
1805	58.3623	51.6003	51		22.2025	48.8844	45.5833			48	43	44.4595	56.8187		58.1212			54	52	45			53.8444	43.5102	55.0636		30
1806	39.029	45	29		20.2025	29.5914	23.5504	31.9679		42	28	18.6923	36.8187		37.1212			47	36	36			31.8444	38.2551	41.639		24
1807	41.029	31.6003	28		11.3418	25.3395	22.9671			43.5	23	21.4595	20.8187		33.1212			42	38	30			24.4917	28	29.7039		22
1808	46.029	50.9167	33		13	30.0208	29.9752			44	27	23.4595	39.6374		33.1212			49	33	30			27	40	42.1661		18
1809	51.8623	58.6721	45		28.7448	47.3395	43.9671			48		32	57.6341		52.1212			53	44	46			46.9139	48.6762	60		33
1810	51.029	48.2527	38		19.3312	33.0208	33.5833			49	26	31.4595	38		45.1212			52	50	31			36.8444	32.5102	46.5187		21
1811	34.029	24.1321	19		13.2152	15.5208	11.5504			33	22	16	17.6308		29.1212			32	19	23			25.9833	20.5102	32.3566		28
1812	52.029	53.6721	45		21.3418	40.0208	37.1667			57	49	35.4595	46.6308		51.1212			52	47	42			38.4139	36.6304	53.9162		35
1813	49.029	53.066	44		34.2152	42.3395	42.3919			56	48	34.3434	54.6374		55.1212			50	53	35			39.9833	35.5714	55.639
1814	48.029	36.9386	39.5		29.2152	37.7689	34.9342				42	35.3462	46.6374		53.1212			48		42			39.9833	41.6316	54.753
1815	38.029	40	60		25.2152	23.5914	30.7656				34	26.3462	32.8187		41.1212			48	41	30			32	26.6316	40.5187
1816	54.029	65.7451	54		57.2152	51.5208	55				58	52.2297	66.8068		65.1212			59	55	61			69.9833	49.4297	71.1505		65.1
1817	46.029	52.2168	43		33.2152	43.5914	45.4661			53	42	39.8434	49.3035		52.7212			47	52	37			56.9833	33	49.5318		46.1
1818	34.029	37.8	25		16.1933	26.5914	18.9004			44	22.5	19.7297	30		30.7212			49	33	33			28	32.6304	39.503		22.1
1819	40.029	39.8605	34		21.2139	27.5914	29.1667			42	36	26.8434	34		43.7212			43	41	33			26.9833	29.5102	42.7688		28.4625
1820	42.029	46.7451	41		27.2152	42.3395	37.8667			54	33.5	33.5759	48.6308		53.1212			48	46	32			30.4139	25.2778	47.7222		32.4625
1821	49.029	53.6128	48.5		33.2152	48.5208	42.3252			60	43	44.1136	56.3154		58.1212			54	49	35			50.9917	39	60.1505		42.4625
1822	2.69565	9.09046	2.5		-5.77171	4.02081	0.0504386	-13.0321		25	-1	0.45979	9.63077		16.1212			24	9	9			3	12	15.6707		-0.0375
1823	50.029	50.707	45.5		36.5592	45.0208	41.4752			55	43	36	54.4881		57.1212			53	50	43			35.9139	34.3158	52.0636		40
1824	44.529	52.2514	46		33.6115	43.5914	42.3919			51	42	41	52.6308		51.7212			44	49	42			46.4139	43.0703	46.6707		39.0753
1825	36.029	30	22.5		9.71719	21.0208	21.4661	13.9679		47	19	15	29.7455		24.7212			43	34	12			23.4917	26.5	39.0318		8.07529
1826	31.029	46.9916	32		18.4594	33.3844	27.4661	23.1464		49	31	24.0759	41		35.1212			47	39	31			32	31.8421	40.0187		22.5753
1827	35.029	41.8605	32.5		18.4594	30.0208	23.3828	25.6464		41	27	24.5759	34		35.7212			47	36	31			31	27.0714	40.6707		23.4125
1828	36.029	40.6721	36		15.2785	34.3844	29.0833	23.6464		47	32	28.5759	37.6374		41.7212			43	50	25			30.9139	21.1241	37.6576		28.4625
1829	34.029	51.8	44		25.3034	43.3395	38.7747	37.6464		51	43	36.1136	48.6374		51.7212			46	51	35			46.9833	37.1053	50.4538		37.2128
1830	24.029	35.6721	32		15.64	30.0208	26.4671	33.6464		46	28	28.8434	40.6333		48.1212			43	41	27			30.8444	25.3265	43.0551		31.5753
1831	40.029	43.8333	27.5		13.4491	30.0208	28.0167	33.1464			24	22.8434	39.6333		36.1212			50	41	25			37.8444	25.1053	45.0636		24.9625
1832	47.029	42.5756	35.5		20.4936	36.0208	34	27.1464			32.5	34.7297	45.3154		51.1212			47	55	39			37.9833	34.6	47.4076		32.0753
1833	24.029	43.1321	32.5		20.6503	29.5208	25.9342	26.6464			29	22.8434	37.2455		39.7212			51	35	31	32		30	25.8714	41.003		30.2128
1834	10.8623	32.3028	22		8.99356	17.0208	18.3919	14.1464			17.5	15.3434	26.8154		31.1212			39	31	20	23		22.9833	26.0011	28.3354		20.4625
1835	39.029	50.5806	38		23.9936	37.0208	36.8919	30.1464			37	28.8434	41.6354		40.7212			49	48	31	46		36.8444	38.6	45.954		32.1628
1836	39.529	50.9916	36		23.7785	38.0208	34.9342	26.6464			31.5	30.5759	46.5621		40.1212			50	47	38	43		40.9833	32.7449	46.1576		33.55
1837	47.529	49.6277	40.5		25.7881	40.9101	37.7656	29.6464			36.5	35.6923	48.1354		48.7212			48	49	37	46		37.9139	34.2937	49		33.3256
1838	37.029	48.3001	41		29.2785	38.9101	40.1667	34.9679			43.5	40.9598	46.8167		48.1212			48	47	36	42		43.9139	37.4444	49.2687		45.05
1839		41.5397	30.5		26.2785	31.7689	26	21.3964			30.5	27.5759	43.0621		40.1212			39	39	32	40		33.4139	34.0833	40.753		34.825
1840		40.8284	27.5		18.5569	25.9101	25	23.9679			22.5	17.8462	34.6333		41.1212	40		42	38	26	39		29.4139	31.4444	40.5233	41	23.2128
1841		42.3564	31.5		19.2785	27	29.4661	21.3964			32.5	27.5759	37.7049		47.1212	35		41	37.5387	27	42		29.9833	27.1433	37.454	43	34.05
1842		38.459	23		21.8421	19.2727	15.3919	13.325			21	18.3434	27.6		34.1212	37		38	26.7824	20	34		16.9139	28.2607	31.9076	38.5	20.7128
1843	39.6957	56.6003	47		36.2722	46.9101	41.1667	36.6821			40	39.9598	52.6374		59.1212	54		55	49.625	38	54		49	39.8421	53.6186	46.5	49.05
1844	46.6957	35.566	25.5		14.7785	23.2727	25.7656	23.6821			20	23.3462	37.0734		33.1212	45		40	37	23	39		28.4139	28.2143	40.1549	44.5	19.6628
1845	29.6957	55.7963	40		38.0569	37.4884	38	31.6821			45	39.4598	50.6308		57.1212	34		53	46.625	32	51		48.8444	37.0769	50.1186	44	46.7128
1846		29.7963	14		14.2785	12.7689	10	8.825			14	13.0759	26.5608		27.1212	29		28	21.525	14	24		20.8444	22.5911	29.454	36	16.4125
1847	34.6957	39.4684	35		25.3418	35.7689	31	28.825			30	30.9598	43.6333		44.5606	55		48	41.7027	28	43		38.8444	26.8242	43.0465	40	36.4625
1848	35.529	41	32		19.7719	30.2727	27.7656	22.1821			27	26.8462	43.5135		40.5606	44		46	41.7027	26	41		35.8444	27.125	40.2687	38	30.5753
1849	32.529	40.9551	33		21	27.2727	32	23.6821			31	30.6923	44.4909		38.0606	56		35	41.4	25	33		34.8444	29	38.2373	41.5	25.55
1850	33.6957	51.5493	40.5		29.2152	36.7689	39.1667	24.325			43.5	33.0759	50.9359		45.0606			54	45.7027	37	45		46	34	49.4697	40	34.4625
1851	39.529	51.6264	40		26.862	35.7689	38.7656	28.7536			38.5	39.3434	52.7526		50.5606	75		52	50	38	51		50.9833	38.125	52.0465	39	38.2128
1852	41.8623	46.2396	36.5		24.3418	25.3395	37.1667	23.0393			32	27.2273	42.6927		40.5606	55		48	43	27	43		36	34.5385	40.2687	35.5	34.4625
1853	42.529	57.1321	40.5		39.2152	35.5208	35.4752	29.1821			45.5	34.9598	54.5721		61.5606	59			42.625	38	50		48.8444	39.4444	51.4823	38	50.1628
1854	48.029	48.0024	39.5		35	28.0914	30.359	29.825			35	37.6136	45.7761		54.5606	64			38.8625	25	35		36.9139	25.5385	41.0465	45	39.1628
1855	45.029	51.2663	38		36.7719	35.2727	32.9752	27.0393			41.5	35.4598	48.9359		50.0606	52		58	43.8514	31	40		38	29.125	47.7273	36	39.6628
1856	47.029	48.5626	36.5		29.9091	32.6286	36.3499	26.825			33	31.9598	49.7526		44.0606	64		33	47.931	30	42		46	35	47.2687	40	31.4625
1857	24.029	37.3981	22		19	20.9101	22.0833	15.2536			24	19.6923	36.6154		34.5606	39		27	33.1637	23	38		21	32.0769	39.2373	41	25.0753
1858	39.1123	28.2707	22		20	20.2727	21.0833	16.2536			30.5	19.2273	36.6927		32.5606	44		25	31.3387	20	31		26.9833	24.4444	36	38	23.0753
1859	28.6123	31.8284	23		21.9545	21	18.9333	20.325			22.5	19	33.918		31.0606	36			30.1512	26	34		23.9833	23.9118	35.7273	42	23.4125
1860	41.6957	50.2381	45		28	36.7689	37.8161	34.7536			47	42.6923	57.1927		57.5606				47.4	34	46		49.9833	34.4444	52.3195	35	41.1628
1861	37.029	35.7667	29		21.7719	26.1286	24.5833	21.2536			26.5	23.6923	38.9067		38.5606	51			35.6512	25	40		29.9833	28.6985	35.3869	31	25.6628
1862	20.029	33.6471	25		19	21.8805	25.8667	18.2536			30	24.6923	36.2568		39.0606	51		16	33.025	25	29		25.9917	22.5385	33.4076	37	26.2128
1863	36.029	38.1321	32		23.0966	20.9101	28.3161	25.4679			31	24.6923	44.4359		38.0606	56		25	43.2	21	35		20.9917	22.5122	35.454	32	23.6628
1864	42.029	38.4192	29		17.2152	25.4884	31.7656	22.1821			25	26	45.0721		35.0606	55		40	42.7027	22	36		37.9917	20.0625	40.9076	32	20.3256
1865	18.029	17.5397	11		6.15216	10.2727	6.76562	1.14643			15	9.34615	25.9359		20.0606	39		26	13.0387	10	21		13	21.601	25.8586	32	13
1866	38.1123	40.7194	32		20.7719	27	32	27.2893			34.5	29.5286	47.3167		44.0606	56		45	40.8125	20	33		37.4917	29.125	45.9538	35	27.6628
1867	37.029	39.2381	31.5		18.3418	27.7689	25.7656	26.825			35	32.5286	49.2513		49.5606	58		37	36.7	20	38		32.4917	20.125	41.253	35	31
1868	17.8623	34.2707	12		6.4073	14	9.46615	11.1107			18	9.11364	31.1814		32.5606	31		35	14.1639	15	22		15.4917	17.125	24.35	32	14
1869	30.6123	34.566	24.5		14.9382	21.7689	24	23.7536			26	27	39.7748		49.0606	55		34	36.8514	25	30		28.4917	17.2847	37.7	38.5	16
1870	23.029	27.7194	15		10.2152	21.0208	11.9342	11.5393			12	15.6923	33.7761		28.5606	47		33	32.8625	17	22		26.4139	17.125	32.7273	32	14
1871	43.279	36.3361	32		22.2152	35.2727	33	27.9679			33	30.8434	49.4595		43.5606	50		48	43.2012	27	52		43.9917	20.125	42.7	38	25
1872	37.029	40.8662	29		25.7719	29.4884	31.9342	24.2536			28	27.6923	45.2359		47.5606	44		46	43.7027	32	39		37.4917	22.125	41.2687	34	34
1873	36.029	38.6277	33		22.7719	29.8395	31.7656	28.6821			26	30.6923	45.9613		46.0606	57		36	43	24	41		33.4917	22.125	39.7273	36	32
1874	28.029	38.2217	17.5		15	19.4884	25	16.6821			21.5	21	41.4067		34.0606	45		42	33.8387	23	33		31	20.125	35.2687	35.5	2
1875	31.029	42.2815	25		23.2152	24.8395	33.9342	21.2536			31.5	27	43.0642		45.5606	53		45	37.8387	20	37		25	18.125	33.0465	30	29
1876	41.029	42.6229	34.5		28.9999	35.6286	29.1667	26.825			31.5	30.8747	49.0755		37.0606	54		50	45.7027	34	47		44.9833	21.125	45.2687	36	32
1877	42.029	38	31.5		26	35.6286	31	27.3964			32.5	32.2273	47.0755		43.0606	58		48	34.625	25	43		40.9833	19.125	44.0465	32	34
1878	34.029	38.4691	34		24	35.0208	32.1667	24.2536			36.5	30.6923	51.0734		52.5606	57		45	42.4	25	56		41.9833	19.125	46.6707	35
1879	46.029	48.2342	48.5		44.2152	47.4884	41.8667	37.825			50.5	53	53.5135		70.5606	49		50	46.7027		58		53.8444	22.125	51.7	40
1880	41.029				22.649	29.9101		22.5393				27	40		63	53		41	34					30.125	40.4538	38
1881	25.779				21.149	27.2727		22.625				26			34	47		40	36					19.3777	35.4538
1882	36.029				25.149	34.8844		33.825				39			48	56		36	46					33.3777	43.4538
1883	35.029				29.649	36.7689		25.8917				38			44	52		52	40					35.5714	41.9538
1884	31.029				25.149	30.2727		22.825				29			40	52		38	33					30.125	32.4538	25
1885	30.279				26.149	25.7689		22.9583				28			42	55								38.92	34.9538	22.5
1886	29.029				24.649	28.9101		22.8917				30			50	53								29.3482	38.9538	17.5
1887	27.029				24.649	28.9101		26.8917				33			47	54								26.1935	33.9538	25
1888					32.149	33.1992		30.3917				41	49.8718		50	55								35.6896	40.4538	29
1889	23.029				35.649	25.0914		12.3917				23	44.5692		44	45								27.6304	42.9538
1890	37.029				31.149	29.8805		29.8917				36	54.8718		50	53								47.5714	41.4538
1891	43.029				34.649	38.6992		38.9583				45	57.9613		51	63								36.4495	40.9538
1892				13	17.649	23.0208		16.9583				24	33.85		33	40								32.7015	26.9538
1893	14.529			-6	-12.351	-0.979192		-2.175				7	23.6		11	33						28		29.5714	22.4538
1894				15	28.149	30.2727		25.3917				31	44.85		49	58						39		35.5714	37.4538
1895				15	21.149	24.2727		17.8917				23	32.6		41	52						38		32.8078	26.9538	20
1896				24	16.149	27.7689		23.825				21	35.1		28	50						42		33.8078	35.9538
1897				19	15.649	21.2727		15.9583				27	29.6		39	50						27		32.5714	19.9538	20
1898				26	20.149	31.2727		38.3917				40	32.6		47	56						42		30.7191	38.9538
1899	36.029			19	21.149	26.7689		23.8917				21	39		36	55						25		30.9578	28.4538
1900	35.029			18	18.149	28.7689		17.9583				23			33	38						32		36.6304	29.9538
1901	24.029			10	10.649	16.5208		19.4792				17.125	36.4333		31	40						34		36.3896	23.9538
1902	45.029			27	20.649	32.3844		31				40.125			42	56								42.9578	36.4538	15
1903	43.029			30	22.149	34.7689		33				31	50.6		45	48						40		45.9578	33.4538
1904	23.029			9	15.149	18.7689		17				16.125			33	32						26		24.5828	17.9538
1905	24.029			15	13.649	24.7689		23				31.625	30.6		32	32						48		26.6304	27.4538	27
1906	32.029			8	11.649	22.5208		18				24	31.6		28	40						40		30.6009	30.4538
1907	34.029			24	22.149	34.5208		30				32			49	31						34		38.2619	39.4538	28.5
1908	21.029			13	14.0954	23.0208		16				22			35	45						49		30.92	28.9538	31
1909	24.029			27	22.0954	33.5208		26				29	59		41	30						48		31.2685	40.4538	45
1910	41.029				36.4442							52		21.88	49	33						55		28.2685	37.4538
1911	25.029			9	14.4442	12.4289		10				14	34.9333	16.88	29	31						41		13.2685	25.9538
1912	31.029			17	19.4442	29.0208		28				24	44	10.88	38	37						44		29.92	46.4538
1913	13.029				22.9442	33.0208		36				34		20.88	47	30						45			29.9538
1914				26	19.0954	35.5208		28				24	45		42	54						45			35.9538	40
1915				13	19.0954	16.2727		10				18	40		34	31						42		23.2685	26.4538	19.5
1916				29	24.0954	36.2727		25				34	47		43	48						46		38.2646	37.4538	10.5
1917				13	16.0954			10				17	26		34	24								23.4343	18.9538	17.5
1918				24	22.0954	25.5208		24				20	42	21.88	38	18								29.2619	31.4538	20
1919	36.029			22	19.0954	28.9101		28				22	46	13.88	34	15								20.9319	32.4538
1920	24.029				18.9442	27.0208		22				27	40	6.88	58	39								18.5952	24.9538
1921					13.0954	20.7689		19				12	27	10.88	38	28						37		12.7652	21.9538
1922					10.9442	26.0889		23				27	41	11.88	44	44						41		12.4495	34.9538
1923					26.0954	28.7689		38				32	41	21.88	40	53								29.5382	36.9538
1924					15.9442	23.2727		24.3125				26	36	9.88	41	44						31		18.7652	31.4538
1925					28.9442	22.5208		29.3125				31	43	25.03	45	42						59		21.2685	29.9659	40
1926	36.029				23.4442	24.5208		35.3125				30	44	26.53	46	50						58		21.2652	38.639	20
1927					19.4442	21.5208		22.8125				29	39	6.53	45	48						40		19.5714	26.639
1928					17.4442	25.2727		27.8125				27	33	22.88	35	43						38		24.2685	27.639
1929				18	22.0954	24.5208		25.3125				26	37	11.03	39	39						33		27.2652	26.639	29
1930				22	26.4442	26.5208		25.3125				36	40	15.53	48	24						42		24.2685	33.639	25.5
1931				14	20.0954	26.2727		27				33	38	19.53	44	36						42			32.639	27.5
1932	41			29	39.9442	34.7689		34				42	50	33.53	45	29						42		36.5382	40.2687	40
1933	35			15	20.0954	26.2727		22.8125				21		16.03	37	32						42			35.9659	20
1934	11			4	16.0954	16.2727		15				10	31	15.88	36	19						42			19.639
1935	27			16	24.0954	31.2727		29				23	37	21.88	38	25						42			33.9659
1936	24			19	31.0954	29.7689		31				35	37	26.88	41	28						42			31.1173
1937	15			8	19.0954	17.7689		21				19	25	11.88	42	15						42			24.9659
1938	34				24.7463	31.7689		28				26	42	20.88	45	33						42			39.2687
1939	40			27	26.2463	41.5208		34				34	55	24.88	41	28						42			43.9659
1940	31			19	24.3971	26.2727		25				23	33	22.88	42	27						40		23.5	27.639
1941	42			27	24.9442	37.5208		36				34	44	22.88	45	43						57		24.25	38.9659
1942	37			14	21.0954	25.5208		24				30	25	14.88	44	31						33		5.5	25.639
1943	26			5	14.7463	19.7291		15				15	28	10.88	40	27						34		10	22.9659
1944	24			18	20.9442	33.1808		27				27	39	15.88	40							46		15.6	28.9659
1945	9			1	8.94423	16.7689		8				4	11	8.88		12						45		26.8886	11.9659
1946	27			17	29.7931	24.9772		28				32	32	21.88	37	20						44		31.8886	24.9659
1947	26			6	13.0563	16.2727		5				8	22		29	23						36		26.8886	18.639
1948				15	20.7931	25.7291		20				29	41		31	22						43		28.8886	36.639
1949				12	26.0954	24.9772		19				20	27		26	25						29		20.8886	28.9659
1950	27.9355			9	17.0954	21.7689		11				20	25		27							34		26.8886	27.9659
1951	47.9355			30	34.0954	34.2291		31				37	52	19.88	46							47		39.4059	40.9659
1952	31.9355			6	16.0563	16.5208		8				9	22	9.88	26							43		27.9059	22.2687
1953	35.9355			11	28.8192	22.5208		15				23	30	16.88	35							43		29.4059	32.639
1954	47.9355			25	35.3971	38.1808		27				41	43	24.88	48							50		33.4059	43.9659
1955	49.9355			23	25.0563	30.7689		28				28	42	17.88	34							36		26.9231	36.639
1956	52.9355			38	39.2009	42.2727		38				45	52	26.88	45							52		35.8886	42.639
1957	44.9355			21	29.0951	31.9101		20					42	24.88	37							46		25.8886	33.639
1958	38.9355			26	35.4247	30.7689		31				43	41	23.88	46							43		26.8886	29.639
1959	33.9355			10	20.6213	16.0772		10				16	21	18.88	26							40		26.8886	23.639
1960	42.9355			12	13.4247	20.7689		12				27	34	17.88	29							40		20.8886	27.639
1961	41.9355			39	14.5951	24.7689		20				26	35	13.88	33							33		11.9231	29.9659
1962	50.9355			26	30.7463	39.5208		34				52	45	29.88	48							45		28.9231	38.639
1963	46.9355			31	33.0954	36.7689		35				44	48	27.88	51							52		22.8886	39.639
1964	37.9355			15	25.0563	21.5478		17				22	26	19.88	35					28		32		16.0266	25.2687
1965	48.9355			34	30.5954	41.9101		39.5				48	51	21.88	52					27		44		23.8886	41.639
1966	42.9355			16	22.4963	26.1856		23				34	40	17.88	41					28		43		20.0266	26.639
1967	41.9355			28	22.2267	31.5208		28				34	28	19.88	40					37		48		25.9231	27.9659
1968	46.9355			27	24.3192	31.7689		33.5				29	34	23.88	45					37		48		24.8886	27.9659
1969	45.9355			30	23.4963	35.7689		31				23	31	29.88	36					36		47		22.9231	29.3025
1970	47.3387			25	26.4509	29.9689		27				29	27	20.88	36					40		44		22.8886	31.3025
1971	36.3387			18	26.5951	19.0546		18				17	18	25.88	35					32		59.5		25.0266	26.2469
1972	50.7419			28	36.0951	36.2727		42				35	42	30.88	50					42		58.5		25.9231	36.7469
1973	45			21	24.8713	23.5208		28				19	28	25.71	35					29		45.5		21.9231	28.0835
1974	41.7419			23	26.5951	24.9117		28					28	31.71	40					44		57.5		27.9231	30.2469
1975	40.7419			25	24.0951	26.5208		30.5				28	29	24.88	39					41		55		26.9231	25.5746
1976	21.7419			6	11.7463	8.76889		1				10	1	20.71	20					23		39		17.8886	15.5835
1977	48.7419				34.3971	35.0865		36				41		26.88						40		64		27.8886	38.0835
1978	53				35.2267	35.1201		39						32.88						40		60.5		25.9231	39.5279
1979	43.9355				29.7267	27.1201		33						26	43.3333					31		45.5		15.8886	29.5279
1980	56.7419				34.7267	38.9824		39						34.71	48.3333					31		58		26.8886	37.2469
1981	36.7419				24.2267	24.0546		28						28	41.3333					45		43		17.8886	20.7469
1982	42.7419				14.7267	19.0277		20						21.71	25.3333					31		39.5		17.4059	17.7469
1983	38.9355				27.2267	26.0277		29						24.88	38.3333					19		36.5		24.4576	19.7469
1984	50.9355				27.2267	33.5117		38						30.71	43.3333					32		40.5		25.8886	30.5746
1985	39.9355				23.7267	27.0706		30						24.88	40.3333					43		46.5		21.8886	33.5746
1986	44.7419				27.7267	24.6201		30						27.71	42.3889					36		41		17.0266	27.5279
1987	49				28.7267	28.9689		37						26.71	44.3889					33		46.5		22.8886	31.7469
1988	37.9355				27.2267	22.0546		26						21.71	35.8889					39		33		16.0266	22.5746
1989	29.9355				1.22672	14.0546		12						12.61	21.3333					28		32.5		12.8886	16.5279
1990	35.7419				9.22672	20.0865		16						13.3	25.3889					16		31.5		13.8886	18.5746
1991	40.7419				25.7267	26.0277		31						18.94	40.3333					26		43		20.9231	24.5279
1992	32.9355				19.7267	16.2617		19						20.71	24.8889					32		44.5		14.9231	15.5746
1993	25.9355				17.2267	16.5117		14						20.71	32.3889					24		34		13.9231	16.9659
1994	28				13.2267	16.1856		19						12.5	27.8889					26		22.5		8.9576	9.96595
1995	36.7419				13.2267	22.5117		25						15.36	31.3333					20		36		15.9231	21.9659
1996	38.7419				17.7267	20.1856		22						23.11	33.8889					27		37.5		20.9231	26.5746
1997	32.7419				12.7267	11.9101		18						14.88	32.8889					17		28.5		13.8886	21.5746
1998	25.7419				15.7267	18.0546		17						21.86	34.3333					25		45		8.88863	14.5279
1999	35.7419				4.22672	16.0546		19						23	27.4444					24		38.5		11.9231	22.9659
2000	22.7419				15.7267	11.1856		17						23.5	29.4444					18		33.5		8.92311	5.96595
2001	32.7419				18.7267	20.0546		26						15.5	30.8889					27		41.5		7.92311	19.9659
2002	31.7419				26.7267	16.1856		17						20.75	34.3889					17		35		10.9231	20.2703
2003	8				-4.27328	-10.0899		-4						12.38	13.3333					-2		27		0.026561	-7.7297
2004	34				11.0563	21.4824		26						21.5	31					23		37.5		12.8886	24.7703
2005	29				-4.94367	13.4689		16						20.38	24					21		30		9.92311	20.7703
2006					16.0563	15.9824		16						12.36	28.3333					20		28.5		9.47484	19.7703
2007														15								33			15.9659

## Sheet: S3. GHD-RCS 2 by 2 correlations
Two-by-two correlation of GHD-RCS : Pearson's correlation coefficients and p-value
	Correlation coefficients
	Als	Auv	Aux	Bea	Bor	Bur	Cha2	Cha1	Gai	Ger	HLV	IdF	Jur	Lan	LLV	Lux	Mar	NIt	NLo	NRv	Sav	Spa	SLo	SRv	Swi	VSE
Auv	0.670769
Aux	0.67237	0.834851
Bea	0.786565
Bor	0.622843	0.786032	0.70277	0.675888
Bur	0.596641	0.852256	0.774865	0.849144	0.659272
Cha2	0.713069	0.879716	0.888036		0.804732	0.895912
Cha1	0.677993	0.825696	0.892184	0.825564	0.71544	0.830829	0.859559
Gai	0.696608		0.7515		0.805541	0.402337
Ger	0.575708	0.778016	0.65475		0.283382	0.644266	0.758206	0.824342	0.53427
HLV	0.647659	0.837803	0.879901		0.847993	0.760865	0.88427	0.822714	0.717702	0.585855
IdF	0.606621	0.801309	0.82083	0.763041	0.695816	0.715786	0.891539	0.824263	0.467867	0.521402	0.906318
Jur	0.544013	0.815347	0.695476	0.652168	0.638291	0.772696	0.860863	0.696547	0.571384	0.60893	0.81458	0.726799
Lan	0.501487	0.297193	0.283514	0.586172	0.427838	0.29781	0.124326	0.448286	0.353952	0.238982	0.319902	0.298008	0.250314
LLV	0.521306	0.779486	0.8214	0.66843	0.76068	0.809605	0.847109	0.734739		0.812885	0.872079	0.800714	0.742079	-0.003089
Lux	0.584119	0.419399	0.587859	0.373683	0.291776	0.393831	0.618369	0.363148			0.490715	0.466022	0.559294	-0.296305	0.408492
Mar	0.490712		0.295522		0.399207	0.429564			0.57858	0.339186	0.624443	0.495361	0.518381	0.582629
Nit	0.620528	0.75757	0.584325		0.494298	0.494306	0.676874	0.629771	0.39312	0.472729	0.605376	0.479703	0.469009	0.406787	0.571142	0.235456	0.427798
NLo	0.676333	0.800427	0.778349		0.643098	0.805366	0.883204	0.842268	0.731012	0.733915	0.79265	0.815326	0.800303	0.245089	0.730082	0.625448	0.38419	0.585625
NRv	0.668547	0.80953	0.796142	0.54182	0.685991	0.728292	0.794807	0.716919		0.537565	0.801449	0.722476	0.52404	0.498907	0.644094	0.448135		0.678356	0.748087
Sav	0.70627	0.729025	0.703938		0.701934	0.675098	0.82752	0.790339	0.610498	0.594251	0.781581	0.630737	0.623477	0.5291	0.759074	0.391327	0.584951	0.639727	0.708158	0.75899
Spa	0.375794		0.137693	0.417631	0.381768	0.437021		0.551679	0.189714	0.182075	0.424269	0.258285	0.284189	0.449774	0.528375	-0.00595223	0.200302	0.351149	0.398911	0.680628	0.389659
SLo	0.661518	0.803665	0.795289		0.785946	0.783839	0.874218	0.832792	0.601473	0.551676	0.829833	0.851684	0.79794	0.247386	0.803067	0.570091	0.649189	0.635807	0.812943	0.76676	0.797455	0.453751
SRv	0.442345	0.747866	0.583337	0.22577	0.267716	0.496927	0.655332	0.373587	0.427808	0.399642	0.442989	0.336959	0.312038	0.564255	0.486021	0.255877	0.656623	0.455122	0.532805	0.62066	0.585828	0.340686	0.583084
Swi	0.629411	0.850691	0.723972	0.688927	0.611005	0.583731	0.862976	0.597586	0.602967	0.42757	0.737787	0.543925	0.683969	0.573924	0.724672	0.589479	0.596587	0.601698	0.788335	0.558022	0.766307	0.298794	0.85798	0.521652
VSE	0.300444	0.417951	0.441534	0.249258	0.429598	0.402037	0.299415	0.20074	0.723714	0.375219	0.269319	0.275308	0.508905	0.372031	0.206722	0.163737	0.690429	0.327513	0.331564	0.439917	0.451663	0.299333	0.297751	0.153831	0.579301
VPC	0.493124	0.773232	0.80269		0.474769	0.592617	0.775037	0.767621		0.462513	0.642485	0.741159	0.472411	-0.126235	0.833469	0.409451	-0.0558926	0.449127	0.692995	0.736861	0.755419	-0.178453	0.798552	0.531977	0.552861	0.184544
	P-value
	Als	Auv	Aux	Bea	Bor	Bur	Cha1	Cha2	Gai	Ger	HLV	IdF	Jur	Lan	LLV	Lux	Mar	Nit	NLo	NRv	Sav	Spa	Slo	SRv	Swi	VSE
Auv	1.55439e-10
Aux	8.88178e-16	0
Bea	4.11893e-13
Bor	0	0	0	5.35127e-11
Bur	0	0	0	0	0
Cha1	2.10554e-12	0	0		0	0
Cha2	0	2.77556e-15	0	0	0	0	0
Gai	0.000221854		0.000323573		7.88795e-08	0.000504784
Ger	2.54664e-11	1.09904e-06	1.40128e-10		0.00324427	0	1.89201e-06	0.0118277	0.000156721
HLV	1.03196e-09	0	0		0	0	0	4.10783e-15	0.0057402	7.83314e-06
IdF	0	0	0	1.04361e-14	0	0	0	0	0.000612316	3.49909e-12	0
Jur	0	0	0	2.25089e-09	0	0	0	0	6.66515e-07	0	0	0
Lan	2.90878e-14	0.0559604	0.00743439	1.49632e-05	3.68948e-11	4.42873e-08	0.432772	9.95909e-08	0.00864588	0.00192958	0.00737176	2.14506e-06	1.55573e-05
LLV	2.66676e-13	0	0	1.4012e-10	0	0	0	0		2.58025e-07	0	0	0	0.972505
Lux	1.59544e-08	0.00876543	0.000104088	0.0114538	0.00229336	3.23109e-05	3.51251e-05	0.000130254			0.00176027	4.22361e-07	6.83317e-09	0.0121069	1.37997e-05
Mar	1.21221e-06		0.0574221		8.86141e-05	3.0191e-11			1.96435e-06	1.38927e-05	0.000382833	2.06315e-11	7.77156e-16	0
Nit	1.66533e-15	3.66374e-15	3.74967e-12		1.47785e-09	2.30908e-11	1.91477e-11	1.53491e-07	0.0703056	1.61608e-07	6.91149e-09	2.35745e-10	5.11618e-10	4.41499e-06	3.87431e-08	0.149033	0.000115879
NLo	3.33067e-16	0	0		6.66134e-16	0	0	0	0.000856687	3.31069e-13	0	0	0	0.0237749	4.88498e-15	7.31317e-06	0.0188936	3.27194e-12
NRv	5.55112e-16	0	0	0.0557948	0	0	0	1.11022e-16		0.00150929	0	0	3.06543e-08	8.7282e-07	2.77556e-15	0.00541023		8.8759e-12	6.66134e-16
Sav	0	6.22008e-09	4.03011e-14		1.66533e-15	0	7.40408e-13	3.93454e-11	0.00197579	1.52091e-08	8.94165e-11	6.88338e-15	1.34337e-14	1.02239e-09	6.27135e-10	0.0151201	3.56742e-08	1.01952e-12	1.00142e-13	9.80339e-10
Spa	1.23445e-06		0.39684	0.000394955	1.90865e-08	0		7.33377e-10	0.157523	0.0289517	0.0173709	3.20052e-05	7.57184e-07	4.71845e-14	6.91032e-09	0.967276	0.00584987	0.00200857	0.015953	1.02336e-07	0.00145937
SLo	3.93019e-13	0	0		0	0	0	9.99201e-16	0.0137126	8.66813e-06	0	0	0	0.0404256	0	0.000186643	0.000446217	9.10383e-13	0	1.11022e-16	1.11022e-16	0.0296485
SRv	1.69531e-13	1.55431e-15	1.43974e-12	0.070556	2.55416e-06	0	4.22922e-11	4.13439e-07	0.000808784	1.01995e-08	1.57914e-06	1.31973e-10	3.47325e-10	0	8.92175e-13	0.0114165	0	2.11751e-09	2.24483e-10	1.89848e-14	1.35936e-12	1.06726e-09	5.44209e-11
Swi	0	0	0	1.6108e-11	0	0	0	0	5.29022e-08	3.32878e-10	0	0	0	0	0	2.39065e-11	0	0	0	1.13449e-11	0	2.1264e-08	0	0
VSE	0.0244574	0.00728338	0.00342052	0.334654	3.29124e-05	9.2569e-06	0.0605271	0.108851	0.00152816	0.0287688	0.0427787	0.0079052	2.54531e-08	0.000260614	0.0984926	0.199749	3.0049e-07	0.0246249	0.0298561	0.00507289	0.00143853	0.0191032	0.0620409	0.108596	1.45424e-11
VPC	2.23865e-05	6.66134e-16	0		8.95858e-07	2.19923e-11	3.33067e-16	8.07776e-12		0.00179199	2.58918e-11	1.11022e-16	3.61809e-07	0.324209	0	0.0131456	0.781857	6.72933e-05	5.6074e-12	4.84057e-14	2.00802e-09	0.354347	0	5.22278e-09	7.99489e-10	0.17333

## Sheet: S4. GHD-RCS - T° correlations
Correlations between GHD-RCS and Tmax AMJJAS : Pearson's correlation coefficients and p-value
						Pearson correlation coefficients																											p-values
Meteo-Station	Abbrev.	Starting date	latitude	longitude	Origin	Als	Auv	Aux	Bea	Bor	Bur	Cha1	Cha2	Gai	Ger	HLV	IdF	Jur	Lan	LLV	Lux	Mar	Nit	Nlo	NRv	Sav	Spa	Slo	SRv	Swi	VSE	VPC	Als	Auv	Aux	Bea	Bor	Bur	ChA	Cha	Gai	Ger	HLV	IdF	Jur	Lan	LLV	Lux	Mar
France
Abbeville	AB	1921	50.1	1.83	Météo-France	-0.612994			-0.651351	-0.656201	-0.705635		-0.742931				-0.792899	-0.632063	-0.513645	-0.74703	-0.414224				-0.74383		-0.548126		-0.378101	-0.629023	-0.483106		1.32877e-08			7.11949e-07	1.64839e-11	9.41469e-14		8.88178e-16				5.39568e-13	2.27166e-07	1.29134e-06	1.77636e-15	0.0284196
Aix-En-Provence	AEP	1879	43.53	5.43	Météo-France	-0.538448			-0.595677	-0.627509	-0.70865		-0.588129				-0.586586	-0.624211	-0.348451	-0.576318	-0.237238		-0.713526	-0.626245	-0.637245		-0.570135		-0.445343	-0.730536	-0.533878		5.30906e-09			2.7099e-08	3.77476e-15	0		5.5278e-13				2.72741e-10	2.88024e-10	0.000818851	3.05844e-12	0.0479892
Angers	ANG	1879	47.47	-0.55	Météo-France	-0.551455			-0.646639	-0.686173	-0.675287		-0.670228				-0.73016	-0.60233	-0.351044	-0.688233	-0.17127		-0.419196	-0.768347	-0.617075		-0.573847		-0.136981	-0.534047	-0.292573		4.80414e-09			6.41507e-10	0	0		1.11022e-16				0	1.70178e-09	0.00106027	0	0.156295
Angouleme-Oisellerie	ANGOU	1888	45.65	0.15	Météo-France	-0.595691			-0.657806	-0.699757	-0.689452		-0.618136				-0.691239	-0.620188	-0.474825	-0.699374	-0.250215				-0.746388		-0.569698		-0.337506	-0.635969	-0.132235		3.00409e-10			2.5664e-10	0	0		1.43996e-13				9.01501e-14	6.6348e-10	3.37331e-06	0	0.0517908
Arbois	ARB	1878	46.9	5.77	Météo-France	-0.579813			-0.696153	-0.621008	-0.774048		-0.705984				-0.716481	-0.7263	-0.4118	-0.719526	-0.400744				-0.733755		-0.591271		-0.515955	-0.750282	-0.0186643		2.15079e-08			2.57251e-09	1.47803e-11	0		1.33227e-15				9.2758e-12	7.53275e-12	7.40771e-05	4.44089e-16	0.0103904
Arcachon	ARC	1895	44.66	-1.16	Météo-France	-0.515222			-0.656867	-0.631142	-0.664533		-0.615687				-0.724013	-0.623045	-0.411023	-0.671721	-0.193146				-0.579674		-0.529567		-0.312116	-0.613246	-0.221038		4.52613e-07			6.6115e-10	4.09783e-13	1.45439e-14		2.7558e-12				2.22045e-14	3.06726e-09	0.000113454	8.10463e-15	0.161712
Aubusson	AUB	1890	45.95	2.16	Météo-France	-0.566748			-0.657492	-0.669927	-0.711284		-0.668111				-0.720629	-0.650874	-0.431517	-0.695852	-0.268672				-0.716397		-0.604514		-0.413542	-0.659543	-0.271215		3.88171e-09			2.63467e-10	2.22045e-16	0		4.44089e-16				5.21805e-15	8.38286e-11	3.00731e-05	0	0.0396332
Auch	AUCH	1881	43.65	0.58	Météo-France	-0.391098			-0.480694	-0.614634	-0.638311		-0.491361				-0.537215	-0.479804	-0.470151	-0.564266	-0.253875		-0.754076	-0.471205	-0.748418		-0.6231		-0.469947	-0.628037	-0.169973		6.26488e-05			1.6749e-05	3.9746e-14	3.44169e-15		9.09962e-09				1.99092e-08	5.83356e-06	4.9381e-06	1.92545e-11	0.0367033
Bagnères de Bigorre	BDB	1888	43.07	0.15	Météo-France	-0.373885			-0.596042	-0.560897	-0.615613		-0.517841				-0.631944	-0.659571	-0.393379	-0.582209	-0.289396				-0.602795		-0.562668		-0.376369	-0.628877	-0.0774826		0.000307155			2.64433e-08	1.03778e-10	6.47149e-13		4.99982e-09				4.03855e-11	2.1413e-11	0.000234153	2.53392e-11	0.0236887
Beauvais	BEA	1879	49.43	2.08	Météo-France	-0.607924			-0.65534	-0.677658	-0.684687		-0.733637				-0.743043	-0.567399	-0.446047	-0.654186	-0.16736		-0.349851	-0.89958	-0.743885		-0.571457		-0.230507	-0.541112	-0.206109		1.23535e-11			3.15225e-10	0	0		0				0	2.2304e-08	1.18226e-05	2.22045e-16	0.16611
Belfort	BEL	1895	47.63	6.87	Météo-France	-0.562143			-0.700983	-0.486851	-0.677334		-0.604783				-0.675449	-0.683289	-0.404255	-0.568804	-0.351703				-0.50508		-0.44836		-0.395906	-0.662455	-0.0876616		1.46437e-08			1.41135e-11	9.1588e-08	1.55431e-15		5.2498e-12				4.62219e-12	1.97818e-11	0.000124547	2.44776e-10	0.00910987
Bergerac	BER	1929	44.85	0.48	Météo-France	-0.640987			-0.653768	-0.773836	-0.766		-0.733364				-0.769904	-0.679738	-0.658416	-0.762564	-0.372511				-0.698115		-0.647233		-0.512374	-0.719007	-0.538108		2.27015e-09			6.27049e-07	4.44089e-16	1.22125e-15		7.31637e-14				2.52449e-10	1.48666e-07	4.36385e-10	7.10543e-15	0.105772
Biarritz	BIA	1893	43.48	-1.57	Météo-France	-0.53354			-0.657955	-0.641153	-0.704354		-0.626922				-0.676658	-0.573574	-0.410665	-0.640977	-0.207909				-0.684585		-0.612163		-0.409524	-0.69376	-0.299202		6.14225e-08			3.38876e-10	2.64233e-14	0		1.82743e-13				2.19447e-12	6.10004e-08	7.78906e-05	6.03961e-14	0.124143
Bordeaux	BORD	1880	44.83	-0.57	Météo-France	-0.492576			-0.649666	-0.700833	-0.706184		-0.612085				-0.705483	-0.656391	-0.377533	-0.714539	-0.348035		-0.290507	-0.723621	-0.683097		-0.607527		-0.452132	-0.673724	-0.213937		1.44992e-07			5.02301e-10	0	0		3.35287e-14				9.99201e-16	2.15888e-11	0.000265072	0	0.00338536
Boulogne-sur-Mer	BSM	1894	50.72	1.62	Météo-France	-0.573982			-0.653768	-0.668095	-0.696794		-0.692904				-0.758887	-0.615216	-0.505158	-0.723727	-0.326914				-0.73769		-0.546271		-0.410075	-0.647707	-0.132155		5.0281e-09			3.53666e-09	6.88338e-15	3.33067e-16		3.33067e-16				1.9984e-15	1.85762e-08	6.04016e-07	0	0.0218641
Bourges	BOU	1878	47.08	2.4	Météo-France	-0.631646			-0.675352	-0.671161	-0.704349		-0.717161				-0.73498	-0.552973	-0.40467	-0.633718	-0.171142		-0.287534	-0.625207	-0.689653		-0.585826		-0.219314	-0.542876	-0.25823		8.43547e-13			5.61489e-11	0	0		0				0	4.91312e-08	7.62188e-05	2.77556e-15	0.153572
Bron	BRON	1885	45.73	4.92	Météo-France	-0.545468			-0.704556	-0.596872	-0.740976		-0.67801				-0.660234	-0.720978	-0.443176	-0.653148	-0.285891				-0.715967		-0.562162		-0.434211	-0.729741	-0.374073		9.09283e-09			3.50808e-12	6.26499e-13	0		0				1.08491e-12	3.19744e-14	1.71784e-05	1.44329e-15	0.022017
Carcassonne	CAR	1878	43.22	2.35	Météo-France	-0.429999			-0.603991	-0.657763	-0.705615		-0.606082				-0.649691	-0.689008	-0.258424	-0.69913	-0.335227		-0.251523	-0.596958	-0.668322		-0.576042		-0.441459	-0.689522	-0.417683		5.81391e-06			1.53866e-08	0	0		5.4845e-14				4.5719e-13	4.32099e-13	0.0139215	0	0.0042669
Chadrac	CHAD	1884	45.07	3.9	Météo-France	-0.548737			-0.649746	-0.558195	-0.68574		-0.612679				-0.546551	-0.643163	-0.477313	-0.544978	-0.195335				-0.712873		-0.589489		-0.40958	-0.660753	-0.398277		5.91682e-09			4.99042e-10	2.89125e-11	0		1.0314e-13				1.7405e-08	9.50782e-11	2.94757e-06	1.76793e-10	0.118914
Charleville-Mézières	CHM	1884	49.77	4.72	Météo-France	-0.605411			-0.710976	-0.654587	-0.747232		-0.752717				-0.766895	-0.673596	-0.488947	-0.696846	-0.254808				-0.678271		-0.561362		-0.343169	-0.643279	-0.283524		5.06619e-11			1.82221e-12	3.33067e-16	0		0				0	5.55478e-12	1.54596e-06	0	0.0405195
Chartres	CHAR	1878	48.45	1.5	Météo-France	-0.611682			-0.662044	-0.717566	-0.682922		-0.717592				-0.746686	-0.574104	-0.421763	-0.665752	-0.17818		-0.591825	-0.724524	-0.736609		-0.596341		-0.20394	-0.550253	-0.282291		6.71374e-12			1.79435e-10	0	0		0				0	1.13393e-08	3.47082e-05	0	0.137109
Chateauroux	CHAT	1881	46.82	1.7	Météo-France	-0.616227			-0.662588	-0.689303	-0.68101		-0.681235				-0.739967	-0.584615	-0.462473	-0.669158	-0.13614		0.0797475	-0.991494	-0.683887		-0.560588		-0.233706	-0.563749	-0.219863		8.8084e-12			1.71314e-10	0	0		0				0	1.00208e-08	6.49161e-06	0	0.268298
Chatillon-sur-Seine	CSS	1924	47.85	4.55	Météo-France	-0.729067			-0.732301	-0.689255	-0.8036		-0.806201				-0.813517	-0.779313	-0.521085	-0.769304	-0.517196				-0.714834		-0.55842		-0.444841	-0.739072	-0.453779		3.83249e-13			4.91624e-09	1.12599e-12	0		0				2.31593e-13	1.00939e-11	1.18164e-06	2.22045e-16	0.00810752
Cherbourg	CHE	1897	49.65	-1.65	Météo-France	-0.556098			-0.52433	-0.683548	-0.61955		-0.623967				-0.636016	-0.485369	-0.418605	-0.627003	-0.0275104				-0.741577		-0.562747		-0.309146	-0.574854	-0.210844		1.53484e-08			4.44758e-06	3.33067e-16	1.43863e-12		6.97664e-13				3.00997e-10	1.55076e-05	5.46129e-05	8.32445e-13	0.846493
Clermont-Ferrand	CLF	1878	45.78	3.08	Météo-France	-0.536208			-0.659496	-0.602293	-0.726386		-0.644137				-0.679361	-0.708613	-0.34322	-0.626939	-0.334588		-0.354764	-0.576823	-0.689474		-0.546929		-0.455201	-0.692445	-0.351772		5.30297e-09			2.22654e-10	6.86118e-14	0		4.44089e-16				1.4766e-14	4.67404e-14	0.000927113	6.77236e-15	0.00434532
Cognac	COG	1935	45.7	-0.33	Météo-France	-0.669293			-0.715301	-0.807086	-0.797118		-0.776965				-0.830558	-0.758844	-0.673074	-0.796059	-0.57984				-0.718923		-0.647342		-0.491438	-0.732653			4.39087e-10			1.47805e-07	0	1.11022e-16		2.66454e-15				1.84452e-11	5.77081e-09	5.97522e-10	7.77156e-16	0.0297436
Colmar	COL	1901	48.08	7.37	Météo-France	-0.583925			-0.671753	-0.577467	-0.774736		-0.718665				-0.666279	-0.681343	-0.419439	-0.668022	-0.429493				-0.674861		-0.548517		-0.491415	-0.749496	-0.0261108		2.34938e-09			1.22864e-09	1.12671e-10	0		0				6.8462e-11	1.16885e-10	4.74851e-05	1.72085e-14	0.00231647
Courcy	COUR	1878	49.32	4	Météo-France	-0.559649			-0.689664	-0.633555	-0.748554		-0.749588				-0.75535	-0.65576	-0.354607	-0.664905	-0.306418		-0.220663	-0.934119	-0.675648		-0.504665		-0.346322	-0.641498	-0.316394		7.97388e-10			1.50232e-11	1.33227e-15	0		0				0	1.28997e-11	0.000605318	0	0.00935137
Cran-Gevrier	CRG	1876	45.9	6.1	Météo-France	-0.528591	-0.936572	-0.908588	-0.598837	-0.560862	-0.723916	-0.757893	-0.61485			-0.806578	-0.58838	-0.679885	-0.172625	-0.614515	-0.235749		-0.374419	-0.776145	-0.681327	-0.759545	-0.57832	-0.932279	-0.403864	-0.705524	-0.333291		6.79613e-09	0.0634284	0.0914121	2.18951e-08	4.75431e-12	0	0.242107	1.15463e-14			0.193422	1.21564e-10	6.09512e-13	0.0998662	1.95399e-14	0.044657
Dax	DAX	1885	43.72	-1.05	Météo-France	-0.483485			-0.62611	-0.670025	-0.680781		-0.568888				-0.609929	-0.598284	-0.431883	-0.66725	-0.23375				-0.705127		-0.620751		-0.413329	-0.665336	-0.25642		6.04346e-07			3.14464e-09	1.11022e-16	0		1.47982e-11				1.38612e-10	3.6715e-09	2.95573e-05	2.22045e-16	0.0630287
Dijon	DIJ	1883	47.32	5.02	Météo-France	-0.620432			-0.721602	-0.587479	-0.764713		-0.707977				-0.712438	-0.688211	-0.419753	-0.645641	-0.306505				-0.727748		-0.532154		-0.417913	-0.672107	-0.16081		9.51328e-12			5.92082e-13	1.13554e-12	0		0				1.11022e-15	1.25633e-12	5.18437e-05	2.22045e-15	0.0123131
Dunkerque	DUN	1881	51.05	2.37	Météo-France	-0.515283			-0.541822	-0.590341	-0.617277		-0.604593				-0.617329	-0.476391	-0.500066	-0.543324	-0.161112		-0.482529	-0.447426	-0.75774		-0.56195		-0.34998	-0.565408	-0.130272		4.12092e-08			7.40539e-07	5.35905e-13	3.67484e-14		1.31228e-13				2.68787e-11	6.93945e-06	8.15665e-07	1.20202e-10	0.189342
Entzheim	ENT	1921	48.53	7.63	Météo-France	-0.751286			-0.716722	-0.606796	-0.781163		-0.772805				-0.775261	-0.719689	-0.481985	-0.708032	-0.529913				-0.65556		-0.512632		-0.406531	-0.741279	-0.441099		2.90878e-14			1.46131e-08	9.46065e-10	0		0				3.69937e-12	5.96253e-10	5.98852e-06	1.44773e-13	0.00372831
Erneville-aux-Bois	EAB	1879	48.73	5.4	Météo-France	-0.60726			-0.712965	-0.621756	-0.79102		-0.755343				-0.773445	-0.697463	-0.299901	-0.689046	-0.371186		-0.221444	-0.976335	-0.653763		-0.522984		-0.372062	-0.712608	-0.339207		1.04241e-11			1.48215e-12	6.10623e-15	0		0				0	1.69309e-13	0.00408201	0	0.0014384
Foix	FOIX	1878	42.97	1.6	Météo-France	-0.371586			-0.545722	-0.598282	-0.652047		-0.542643				-0.608139	-0.628355	-0.21201	-0.620189	-0.300947		-0.305644	-0.378229	-0.582111		-0.577467		-0.393132	-0.655787	-0.447226		0.000152596			5.94045e-07	2.72227e-13	5.55112e-16		1.07161e-10				3.10664e-11	1.56629e-10	0.0500345	4.22995e-14	0.0107651
Groix	GRO	1885	47.63	-3.47	Météo-France	-0.5345			-0.629273	-0.721166	-0.660379		-0.654086				-0.710901	-0.544685	-0.450583	-0.680619	-0.12196				-0.689909		-0.550211		-0.201863	-0.528022	-0.300253		2.03362e-08			2.48019e-09	0	4.44089e-16		7.77156e-16				2.88658e-15	1.46624e-07	1.19061e-05	0	0.337037
Gueret	GUE	1880	46.17	1.87	Météo-France	-0.457612			-0.644659	-0.623805	-0.709437		-0.603618				-0.673501	-0.650353	-0.260868	-0.742132	-0.396571		-0.00172013	-0.0858044	-0.725857		-0.573048		-0.428223	-0.695885	-0.329142		1.50037e-06			7.51692e-10	7.77156e-15	0		1.16795e-13				5.54001e-14	3.77732e-11	0.0140951	0	0.000742324
Hegeney	HEG	1912	48.88	7.73	Météo-France	-0.624395			-0.689044	-0.594922	-0.781596		-0.758477				-0.724118	-0.718854	-0.419289	-0.708789	-0.477272				-0.698065		-0.535351		-0.462083	-0.753518	0.105696		1.66919e-09			8.39371e-09	3.20821e-10	0		0				1.36218e-11	3.24964e-11	6.49379e-05	5.44009e-15	0.00281776
Ile de Batz	IDB	1897	48.73	-4	Météo-France	-0.585237			-0.573832	-0.68973	-0.635981		-0.658195				-0.645048	-0.492351	-0.455875	-0.666698	-0.103108				-0.772744		-0.550695		-0.317929	-0.550971	-0.156206		1.7103e-09			3.12867e-07	1.11022e-16	2.38809e-13		1.32117e-14				1.39534e-10	1.11836e-05	9.11487e-06	8.21565e-15	0.466985
Istres	IST	1884	43.52	4.98	Météo-France	-0.558121			-0.624532	-0.610677	-0.700145		-0.632705				-0.580519	-0.583224	-0.496302	-0.552562	-0.220737				-0.660086		-0.603154		-0.437637	-0.68249	-0.263734		2.85947e-09			3.53648e-09	1.02807e-13	0		8.99281e-15				1.31525e-09	1.10698e-08	1.01532e-06	8.74423e-11	0.0772324
La Ciotat	LCIO	1881	43.17	5.6	Météo-France	-0.561212			-0.64969	-0.643862	-0.732392		-0.629844				-0.596697	-0.582547	-0.504868	-0.576221	-0.246454		-0.649814	-0.736694	-0.655033		-0.597322		-0.481767	-0.691764	-0.385145		1.25087e-09			5.01338e-10	7.77156e-16	0		5.9952e-15				1.75626e-10	1.16178e-08	6.14535e-07	4.6636e-12	0.0427651
La Hague	LHAG	1894	49.7	-1.95	Météo-France	-0.58844			-0.593128	-0.719602	-0.629063		-0.65011				-0.682714	-0.497974	-0.499917	-0.668748	-0.0864635				-0.750347		-0.57359		-0.265051	-0.580626	-0.289363		1.32594e-09			5.02468e-08	0	2.38698e-13		1.53211e-14				1.61204e-12	5.46882e-06	8.22824e-07	2.55351e-15	0.530214
Le Havre	LHAV	1895	49.5	0.13	Météo-France	-0.646574			-0.6427	-0.671995	-0.660002		-0.691209				-0.744867	-0.557013	-0.490478	-0.659426	-0.149406				-0.746637		-0.50647		-0.277524	-0.570829	-0.16576		7.69174e-12			1.99414e-09	8.88178e-16	7.88258e-15		1.11022e-16				1.55431e-15	2.54853e-07	1.41754e-06	1.13243e-14	0.28091
Le Mans	LMAN	1878	48	0.2	Météo-France	-0.629034			-0.672176	-0.689183	-0.680551		-0.727171				-0.738346	-0.557739	-0.447601	-0.655981	-0.200305		-0.391532	-0.80142	-0.705798		-0.581342		-0.22314	-0.516789	-0.230114		1.116e-12			7.44923e-11	0	0		0				0	3.56109e-08	9.7214e-06	1.11022e-16	0.0939605
Les Estables	LEST	1936	44.91	4.15	Météo-France	-0.659221			-0.666402	-0.679547	-0.757816		-0.712597				-0.684933	-0.655658	-0.590991	-0.660119	-0.585281				-0.610013		-0.570439		-0.46751	-0.707524			1.31511e-09			2.67804e-06	1.36473e-10	4.77396e-14		6.5381e-12				1.08823e-06	3.274e-06	2.1847e-07	1.64547e-09	0.0356063
Limoges	LIM	1880	45.85	1.25	Météo-France	-0.460459			-0.630284	-0.638871	-0.670843		-0.588048				-0.641865	-0.643998	-0.347818	-0.712579	-0.372647		-0.215294	-0.523572	-0.703559		-0.585853		-0.416083	-0.668972	-0.0664469		1.26626e-06			2.29781e-09	1.11022e-15	0		6.92446e-13				1.82643e-12	6.71619e-11	0.000898595	0	0.00161436
Lyon	LYON	1928	45.75	4.85	Météo-France	-0.79713			-0.846143	-0.743154	-0.874128		-0.800007				-0.857446	-0.84598	-0.627804	-0.778995					-0.694373		-0.633244		-0.744263	-0.810223			4.4798e-10			0.000266108	2.62411e-08	8.4488e-14		3.48635e-10				0.00017894	0.000267577	1.11444e-05	5.20119e-09
Marignane	MARI	1921	43.42	5.22	Météo-France	-0.634562			-0.615196	-0.700927	-0.758168		-0.684114				-0.622864	-0.601453	-0.576246	-0.685152	-0.3331				-0.669628		-0.622108		-0.535661	-0.756133	-0.681177		2.15951e-09			4.19561e-06	1.14242e-13	1.11022e-16		7.32636e-13				3.81359e-07	1.19647e-06	2.23018e-08	1.72717e-12	0.0832568
Marseille	MARS	1878	43.3	5.4	Météo-France	-0.446923			-0.637778	-0.577239	-0.652567		-0.559713				-0.619356	-0.576168	-0.369885	-0.519178	-0.207255		-0.520038	-0.476308	-0.487688		-0.580103		-0.38716	-0.674245	-0.52165		2.79842e-06			1.29264e-09	1.83475e-12	3.33067e-16		1.4e-11				1.05738e-11	9.77096e-09	0.00038981	8.965e-10	0.0828743
Metz-Augny	METZ	1899	49.13	6.17	Météo-France	-0.604343			-0.697861	-0.602595	-0.776528		-0.768542				-0.752438	-0.692936	-0.443163	-0.731601	-0.39853				-0.701429		-0.527338		-0.409934	-0.73036	-0.0833456		3.59199e-10			7.41601e-11	8.24929e-12	0		0				2.9976e-15	2.99543e-11	1.71891e-05	0	0.00414963
Monsols	MONS	1928	46.22	4.52	Météo-France	-0.719982			-0.69224	-0.685342	-0.769645		-0.736351				-0.7418	-0.705009	-0.611433	-0.706709	-0.352583				-0.719168		-0.601688		-0.48086	-0.734604	-0.333319		1.48459e-12			7.05155e-08	6.17539e-12	3.33067e-16		2.32037e-14				1.61713e-09	2.22121e-08	9.14183e-09	1.98297e-12	0.116966
Montelimar	MONT	1920	44.57	4.75	Météo-France	-0.594353			-0.603149	-0.680171	-0.719109		-0.671034				-0.640657	-0.624279	-0.561639	-0.624014	-0.244522				-0.704604		-0.622845		-0.502838	-0.713361	-0.578438		2.96107e-08			7.22112e-06	8.10907e-13	9.10383e-15		2.10842e-12				1.04911e-07	2.72985e-07	4.89924e-08	3.77017e-10	0.201115
Montpellier-Mauguio	MONTP	1874	43.6	3.88	Météo-France	-0.362515	-0.604696	-0.782184	-0.578006	-0.563904	-0.645725	-0.59314	-0.556886			-0.706397	-0.62129	-0.588166	-0.178432	-0.631574	-0.316728		-0.168025	-0.258882	-0.572192	-0.558727	-0.572429	-0.851938	-0.441637	-0.686815	-0.49163	-0.332825	0.000124439	0.203511	0.0659986	8.56874e-08	2.3298e-12	1.11022e-16	0.214628	5.97045e-12			0.11665	3.2313e-12	1.68511e-09	0.0853143	1.33227e-15	0.00563079
Mornant	MORN	1931	45.62	4.67	Météo-France	-0.691504			-0.709405	-0.695747	-0.776844		-0.771902				-0.742934	-0.735418	-0.650223	-0.69625	-0.550283				-0.692563		-0.613699		-0.482562	-0.728358			2.45026e-11			4.89306e-08	5.98033e-12	4.44089e-16		7.77156e-16				5.10144e-09	8.72029e-09	1.11755e-09	1.57079e-11	0.0179694
Nancy	NANC	1879	48.68	6.2	Météo-France	-0.53408			-0.664106	-0.554813	-0.724573		-0.69973				-0.629691	-0.60321	-0.344248	-0.584937	-0.375781		-0.0734077	-0.563392	-0.760236		-0.515459		-0.367832	-0.642834	-0.0892939		8.83352e-09			1.50457e-10	1.89688e-11	0		0				4.87577e-12	1.58845e-09	0.00102292	1.49725e-12	0.00134702
Nantes	NANT	1881	47.22	-1.55	Météo-France	-0.548544			-0.616266	-0.658878	-0.64014		-0.647487				-0.692166	-0.563878	-0.430449	-0.697031	-0.121548		0.3923	-0.893857	-0.658574		-0.551653		-0.188089	-0.507435	-0.235213		3.45827e-09			6.47248e-09	1.11022e-16	1.9984e-15		5.55112e-16				7.99361e-15	4.21949e-08	3.16238e-05	0	0.32345
Narbonne	NAR	1891	43.18	3	Météo-France	-0.425528			-0.552458	-0.595533	-0.69298		-0.617287				-0.598099	-0.602226	-0.478635	-0.626549	-0.284528				-0.668752		-0.603842		-0.487517	-0.662604	-0.460299		2.61245e-05			4.03318e-07	2.77312e-12	0		3.30291e-13				1.49992e-09	5.45439e-09	2.74234e-06	1.90625e-13	0.0304117
Nîmes	NIM	1878	43.83	4.35	Météo-France	-0.742138			-0.408675	-0.770378	-0.780622		-0.663373				-0.493421	-0.402518	-0.700982	-0.714282					-0.716384		-0.678386		-0.696034	-0.737833			1.34664e-10			0.0381856	9.68026e-12	3.39073e-12		4.59171e-08				0.0121941	0.0414837	3.58494e-09	2.74922e-09
Orange	ORAN	1881	44.13	4.8	Météo-France	-0.792511			-0.608074	-0.744071	-0.779076		-0.689338				-0.683462	-0.627471	-0.651284	-0.71753	-0.175377				-0.71644		-0.663621		-0.565965	-0.766436			1.24567e-13			0.000222679	9.59233e-12	2.29594e-13		1.12824e-09				2.25738e-05	0.000121148	5.46907e-08	3.37789e-10	0.777852
Orléans	ORL	1881	47.92	1.9	Météo-France	-0.635941			-0.668993	-0.683142	-0.68877		-0.727702				-0.768057	-0.621683	-0.471575	-0.697134	-0.165899		0.271984	-0.956801	-0.686112		-0.576338		-0.214151	-0.558307	-0.317307		1.16862e-12			9.85492e-11	0	0		0				0	5.87488e-10	4.01746e-06	0	0.176355
Paris	PAR	1873	48.83	2.32	Météo-France	-0.656548	-0.502825	-0.898461	-0.667389	-0.678506	-0.682264	-0.753555	-0.729955			-0.736764	-0.765075	-0.542288	-0.439596	-0.625046	-0.222764		-0.0262315	-0.524925	-0.694847	-0.708299	-0.565227	-0.771354	-0.245951	-0.532205	-0.109215	-0.620063	1.21014e-14	0.250064	0.0059703	1.13324e-10	0	0	0.0504509	0			0.0589054	0	4.04241e-08	8.30986e-06	2.44249e-15	0.0530878
Pau-Uzein	PAU	1879	43.3	-0.37	Météo-France	-0.480164			-0.634045	-0.69326	-0.684992		-0.577717				-0.638348	-0.583723	-0.282636	-0.679252	-0.272479		-0.439636	-0.651695	-0.70711		-0.605452		-0.384262	-0.66206	-0.366177		3.27378e-07			1.72485e-09	0	0		1.74227e-12				2.01239e-12	6.95866e-09	0.00728246	0	0.022487
Perigueux	PERI	1881	45.18	0.72	Météo-France	-0.438675			-0.656686	-0.663575	-0.713061		-0.617847				-0.70364	-0.680102	-0.370622	-0.749742	-0.406389		-0.205843	-0.774149	-0.715227		-0.557773		-0.489206	-0.699616	-0.157055		4.98991e-06			2.81812e-10	0	0		2.68674e-14				1.88738e-15	2.89635e-12	0.000409853	0	0.000584471
Perpignan	PERP	1872	42.68	2.88	Météo-France	-0.40545	-0.827135	-0.628292	-0.572895	-0.63606	-0.693839	-0.683851	-0.580725			-0.605261	-0.625106	-0.665384	-0.141236	-0.658857	-0.375154		-0.227473	-0.359733	-0.569136	-0.285532	-0.584666	-0.572593	-0.470592	-0.747101	-0.40292	-0.657368	1.22223e-05	0.0112976	0.0952613	1.18054e-07	2.22045e-16	0	0.061451	2.89768e-13			0.111839	1.31406e-12	8.43769e-13	0.169881	0	0.000774361
Phalsbourg	PHAL	1899	48.77	7.27	Météo-France	-0.601659			-0.70968	-0.590981	-0.80084		-0.762793				-0.711811	-0.711459	-0.427926	-0.70225	-0.44129				-0.751939		-0.53476		-0.449425	-0.773012	-0.096228		4.50035e-10			2.54181e-11	2.57453e-11	0		0				3.96017e-13	5.10048e-12	3.55868e-05	1.11022e-16	0.00133728
Ramatuelle	RAM	1895	43.22	6.62	Météo-France	-0.460103			-0.52188	-0.58903	-0.654322		-0.587497				-0.494331	-0.51926	-0.487061	-0.53967	-0.21102				-0.613165		-0.574971		-0.508397	-0.685302	-0.391729		5.72364e-06			3.60109e-06	1.29965e-11	1.59872e-14		1.87705e-11				2.72795e-06	2.13411e-06	1.71916e-06	1.99474e-09	0.125597
Rennes	REN	1879	48.08	-1.68	Météo-France	-0.569362			-0.632718	-0.711981	-0.685141		-0.696605				-0.722457	-0.570591	-0.389555	-0.697418	-0.19552		-0.230004	-0.889396	-0.721712		-0.583246		-0.222304	-0.562724	-0.292361		4.25378e-10			1.90945e-09	0	0		0				1.11022e-16	1.78487e-08	0.000161095	0	0.104786
Romilly-sur-Seine	RSS	1921	48.52	3.72	Météo-France	-0.720803			-0.700641	-0.667867	-0.767377		-0.780567				-0.809596	-0.737647	-0.516612	-0.760738	-0.489729				-0.681473		-0.548084		-0.406709	-0.700494	-0.337949		9.37694e-13			4.18217e-08	3.93763e-12	0		0				7.29417e-14	1.32727e-10	9.31427e-07	2.22045e-16	0.00816444
Rothau	ROT	1899	48.45	7.22	Météo-France	-0.56622			-0.708704	-0.546481	-0.736389		-0.709522				-0.708826	-0.697119	-0.424115	-0.660743	-0.450642				-0.576158		-0.54824		-0.407119	-0.703559	-0.0346581		1.62532e-08			2.78256e-11	2.82355e-09	0		1.11022e-16				5.48117e-13	2.03194e-11	6.45294e-05	9.9365e-14	0.00102317
Royan	ROY	1893	45.63	-1.03	Météo-France	-0.577254			-0.655972	-0.696876	-0.684325		-0.64951				-0.731638	-0.592662	-0.435808	-0.711486	-0.13752				-0.686207		-0.585245		-0.302286	-0.62311	-0.116744		2.58867e-09			3.98958e-10	0	2.22045e-16		1.24345e-14				3.9968e-15	1.69804e-08	2.45297e-05	0	0.312158
Saint Etienne	STE	1881	45.43	4.4	Météo-France	-0.554064			-0.675798	-0.576743	-0.718731		-0.657951				-0.632736	-0.666693	-0.451529	-0.611108	-0.271808		0.188133	-0.923424	-0.70088		-0.572539		-0.461159	-0.674271	-0.242531		2.2319e-09			5.3947e-11	2.37887e-12	0		1.11022e-16				6.03673e-12	1.08892e-11	1.1355e-05	9.76996e-14	0.0249465
Saint-Didier sur Baujeu	SDB	1928	46.15	4.55	Météo-France	-0.728895			-0.706035	-0.700748	-0.79066		-0.768806				-0.740013	-0.685357	-0.615941	-0.730038	-0.42021				-0.738096		-0.651796		-0.487337	-0.741846	-0.37922		5.7454e-13			2.96217e-08	1.29452e-12	0		3.33067e-16				1.85505e-09	7.69695e-08	6.62542e-09	1.58651e-13	0.0578788
Saint-Flour	SFL	1923	45.03	3.1	Météo-France	-0.681925			-0.652749	-0.687081	-0.759046		-0.713056				-0.677275	-0.649197	-0.573539	-0.692153	-0.360893				-0.699161		-0.62411		-0.492983	-0.716865	-0.472158		4.25788e-11			6.61633e-07	1.02085e-12	1.11022e-16		5.67324e-14				2.5627e-08	1.45409e-07	4.05128e-08	1.61104e-12	0.0700946
Saint-Genis-Laval	SGL	1881	45.68	4.8	Météo-France	-0.537882			-0.667413	-0.599995	-0.746763		-0.68018				-0.676532	-0.69983	-0.454384	-0.664047	-0.292022		-0.11988	-0.839874	-0.710173		-0.556575		-0.483763	-0.687415	-0.273271		7.88047e-09			1.13091e-10	1.78191e-13	0		0				5.28466e-14	3.61711e-13	9.83165e-06	1.11022e-16	0.0156769
Saint-Laurent de la Pree	SLP	1896	45.98	-1.03	Météo-France	-0.572365			-0.666071	-0.704741	-0.692521		-0.65826				-0.757868	-0.636888	-0.462222	-0.729653	-0.222677				-0.710892		-0.58858		-0.336069	-0.627502	-0.101999		4.62926e-09			4.22033e-10	0	1.11022e-16		9.76996e-15				4.44089e-16	1.38516e-09	6.57675e-06	0	0.109012
Saint-Martin d'Heres	SMH	1878	45.17	5.77	Météo-France	-0.481262			-0.643466	-0.56082	-0.705513		-0.624603				-0.622693	-0.657712	-0.344409	-0.581748	-0.316964		-0.592019	-0.7275	-0.589134		-0.552433		-0.436397	-0.678396	-0.500925		4.59379e-07			8.2662e-10	1.51763e-11	0		1.4988e-14				7.60925e-12	1.06921e-11	0.00116576	3.21709e-12	0.00707696
Saint-Veran	SV	1932	45.92	4.53	Météo-France	-0.69844			-0.712312	-0.727348	-0.806972		-0.777751				-0.724355	-0.693299	-0.666686	-0.73075	-0.469214				-0.749366		-0.669737		-0.549361	-0.751581			1.27571e-11			5.86865e-08	3.15525e-13	0		5.55112e-16				2.72746e-08	1.82443e-07	4.01322e-10	6.92335e-13	0.0574189
Sete	SET	1875	43.4	3.68	Météo-France	-0.366733	-0.880978	-0.772067	-0.589125	-0.601148	-0.667204	-0.780879	-0.540958			-0.768005	-0.622119	-0.652279	-0.154598	-0.655464	-0.305834		-0.21528	-0.353503	-0.570848	-0.319175	-0.5543	-0.583336	-0.45744	-0.686579	-0.452051		0.000110364	0.0484021	0.126069	4.18608e-08	3.9635e-14	0	0.118999	3.63548e-11			0.129369	3.80851e-12	7.68896e-12	0.13897	1.11022e-16	0.0080513
Strasbourg	STR	1899	48.58	7.75	Météo-France	-0.587579			-0.687211	-0.544286	-0.76061		-0.740226				-0.704124	-0.732379	-0.39119	-0.692916	-0.450984				-0.650771		-0.486153		-0.402002	-0.731965	0.0138058		1.7649e-09			1.86404e-10	1.95631e-09	0		0				9.07052e-13	5.80314e-13	0.000195912	6.66134e-16	0.00101305
Toulon	TLO	1891	43.12	5.93	Météo-France	-0.446876			-0.507793	-0.541894	-0.637486		-0.558584				-0.524135	-0.560768	-0.458739	-0.546382	-0.219051				-0.542869		-0.599207		-0.439846	-0.667544	-0.284846		8.97912e-06			4.52621e-06	4.77376e-10	4.09672e-14		1.28436e-10				2.63087e-07	9.31407e-08	7.87321e-06	5.53817e-10	0.0985226
Toulouse-Blagnac	TOU	1874	43.6	1.43	Météo-France	-0.440907	-0.918009	-0.881753	-0.607126	-0.647883	-0.714512	-0.860369	-0.59254			-0.876401	-0.650467	-0.685524	-0.198581	-0.698093	-0.341022		-0.312519	-0.498127	-0.620144	-0.618273	-0.583139	-0.731562	-0.444567	-0.700426	-0.371384	-0.942088	2.00361e-06	0.00980827	0.0201468	1.2377e-08	1.11022e-16	0	0.0278839	1.11688e-13			0.0219711	1.37002e-13	1.72973e-13	0.0550211	0	0.00275313
Tulle	TUL	1880	45.27	1.77	Météo-France	-0.464284			-0.665589	-0.618896	-0.669987		-0.638579				-0.704312	-0.657997	-0.315633	-0.703952	-0.365013		0.28481	-0.325267	-0.63641		-0.550629		-0.362406	-0.646622	-0.198104		1.00576e-06			1.32437e-10	1.44329e-14	0		1.44329e-15				1.22125e-15	1.85634e-11	0.00273961	0	0.00204381
Valleraugue	VAL	1896	44.08	3.64	Météo-France	-0.531802			-0.657749	-0.63548	-0.712349		-0.634572				-0.592151	-0.560914	-0.525787	-0.589665	-0.209484				-0.668355		-0.617664		-0.476136	-0.677626	-0.31399		8.19522e-08			8.2364e-10	1.14686e-13	0		1.65534e-13				7.23393e-09	2.45036e-07	1.6993e-07	2.92062e-11	0.132206
Vichy-Charmeil	VIC	1922	46.12	3.42	Météo-France	-0.685327			-0.697925	-0.639274	-0.758002		-0.74636				-0.770019	-0.7288	-0.510084	-0.725024	-0.416586				-0.700943		-0.556317		-0.415514	-0.693922	-0.33377		3.12183e-11			4.96132e-08	7.80674e-11	1.11022e-16		5.55112e-16				1.00325e-11	4.16205e-10	1.57187e-06	2.86438e-14	0.030651
Villefranche sur Saône	VSS	1931	45.98	4.72	Météo-France	-0.697737			-0.69563	-0.681623	-0.804804		-0.77933				-0.745604	-0.730985	-0.631007	-0.725297	-0.517315				-0.745733		-0.614101		-0.483202	-0.745024			1.36406e-11			1.13316e-07	2.31112e-11	0		3.33067e-16				4.19813e-09	1.18638e-08	4.75606e-09	8.46545e-13	0.0279039
Other countries
Central England	CET	1659	51.5	-0.12	Manley (1974) ; Parker & Horton (2005)	-0.420308	-0.567962	-0.595934	-0.525833	-0.556944	-0.514019	-0.66896	-0.563959	-0.579903	-0.395309	-0.673557	-0.656605	-0.613864	-0.159412	-0.689212	-0.400336	-0.310258	-0.314893	-0.605456	-0.618649	-0.457871	-0.317896	-0.599391	-0.372855	-0.472499	-0.133059	-0.704653	1.2258e-12	3.91625e-08	1.16462e-13	1.77659e-06	0	0	8.74711e-12	1.11022e-16	8.79232e-05	1.9282e-07	6.4504e-13	0	0	0.00881519	0	1.93232e-05	0.000278617
De Bilt, Netherland	BILT	1706	52.1	5.18	Van Engelen & Geurts (1983–1992); EC EMULATE project	-0.47303	-0.591495	-0.584831	-0.547339	-0.435097	-0.629341	-0.683211	-0.609173	-0.482392	-0.513004	-0.621061	-0.655697	-0.611796	-0.170624	-0.611827	-0.390083	-0.292298	-0.431126	-0.653718	-0.563814	-0.479667	-0.296527	-0.585271	-0.41886	-0.450422	0.0270857	-0.525533	2.10942e-15	7.58712e-09	4.2133e-13	5.41735e-07	2.42806e-13	0	2.10931e-12	0	0.0197418	1.5268e-09	1.30772e-09	0	0	0.0116266	0	3.27526e-05	0.00601048
Karlsruhe, Germany	KARL	1876	49.02	8.38	Klein Tank et al. (2002)	-0.303959	-0.810506	-0.934009	-0.52234	-0.460901	-0.695442	-0.977729	-0.571048			-0.953042	-0.617522	-0.698523	-0.062492	-0.641237	-0.536395		-0.0685181	-0.544282	-0.5428	-0.575279	-0.3858	-0.885987	-0.540794	-0.720669	-0.22932		0.00179993	0.189494	0.065991	2.52418e-06	4.95694e-08	0	0.0222708	2.91012e-12			0.0469585	9.89897e-12	1.06803e-13	0.558456	7.77156e-16	1.19475e-06
Milan, Italy	MIL	1865	45.46	9.19	Maugeri et al. (2002)	-0.406864	-0.692927	-0.508035	-0.595487	-0.459743	-0.553876	-0.600935	-0.56914	-0.521984	-0.493315	-0.614119	-0.556348	-0.539805	-0.130967	-0.490739	-0.229711	-0.340579	-0.43204	-0.57411	-0.5854	-0.424656	-0.4633	-0.587107	-0.393152	-0.450672	-0.132254	-0.623531	4.31532e-09	1.06526e-12	5.83679e-09	2.74464e-08	1.22236e-13	0	3.00522e-09	2.22045e-16	0.0316136	2.97613e-05	2.23798e-09	0	2.22045e-16	0.0998672	3.26517e-13	0.0173052	0.0655248
Stuttgart, Germany	STU	1900	48.72	9.22	Klein Tank et al. (2002)	-0.581012			-0.639412	-0.520536	-0.770121		-0.687809				-0.661033	-0.628077	-0.305202	-0.652141	-0.432661				-0.669209		-0.520269		-0.494232	-0.760469	-0.0654446		2.94392e-09			1.2929e-08	1.25681e-08	0		7.77156e-16				1.08629e-10	9.84987e-09	0.00404697	8.53762e-14	0.00213128
Geneve, Switzerland	GEN	1901	46.12	6.09	Klein Tank et al. (2002)	-0.566102			-0.675237	-0.607674	-0.770525		-0.701873				-0.635165	-0.646607	-0.443696	-0.687398	-0.383262				-0.695734		-0.597573		-0.491267	-0.77115	-0.121689		1.1012e-08			9.36894e-10	6.25178e-12	0		1.11022e-16				9.31584e-10	1.95283e-09	1.49271e-05	1.44329e-15	0.00716992
Luxembourg, Luxembourg	LUX	1947	49.37	6.12	Klein Tank et al. (2002)	-0.796071			-0.609535	-0.712849	-0.829773		-0.764646				-0.846116	-0.832604	-0.578835	-0.791357					-0.68004		-0.572072		-0.551159	-0.783567			1.34559e-13			0.000349587	1.66591e-10	2.22045e-16		1.15574e-12				7.42426e-09	1.15673e-08	2.96631e-06	1.43108e-13
Navacerrada, Spain	NAV	1946	40.46	-4	Klein Tank et al. (2002)	-0.471274			-0.334532	-0.561597	-0.478025		-0.464109				-0.120482	0.0675263	-0.588091	-0.47919	0.64293				-0.628934		-0.723952		-0.473325	-0.388567			0.000188504			0.0658482	2.49174e-06	9.77374e-05		0.000164918				0.525961	0.71815	1.50676e-06	0.000123211	0.35707
Salamanca, Spain	SAL	1945	40.56	-5.29	Klein Tank et al. (2002)	-0.412672			-0.423338	-0.479645	-0.33894		-0.466755				-0.244868	-0.0663332	-0.625263	-0.382061	-0.271804				-0.559169		-0.577881		-0.260777	-0.255527			0.00116202			0.0157682	7.99612e-05	0.00704357		0.000131268				0.184291	0.71832	1.54542e-07	0.00282608	0.658238
[truncated: 10 more columns]

## Sheet: S5. T° 2 by 2 correlations
Two-by-two correlation of Tmax AMJJAS : Pearson's correlation coefficients and p-value
				Pearson correlation coefficients
City	Abb	Lat (°N)	Long (°E)	AB	AEP	ANG	ANGOU	ARB	ARC	AUB	AUCH	BDB	BEA	BEL	BER	BIA	BORD	BSM	BOU	BRON	CAR	CHAD	CHM	CHAR	CHAT	CSS	CHE	CLF	COG	COL	COUR	CRG	DAX	DIJ	DUN	ENT	EAB	FOIX	GRO	GUE	HEG	IDB	IST	LCIO	LHAG	LHAV	LMAN	LEST	LIM
France
Abbeville	AB	50.1	1.83	1	0.660181	0.910872	0.871563	0.849174	0.860097	0.839532	0.725041	0.735425	0.966032	0.795944	0.866699	0.787708	0.851757	0.94297	0.898449	0.83203	0.739829	0.728392	0.930477	0.943718	0.914146	0.896893	0.894765	0.812518	0.879288	0.810764	0.949163	0.747684	0.801186	0.857717	0.847793	0.858973	0.92395	0.70194	0.921996	0.862665	0.889732	0.861554	0.715221	0.694238	0.890542	0.945012	0.938073	0.759589	0.842387
Aix-En-Provence	AEP	43.53	5.43	0.660181	1	0.663772	0.788658	0.845633	0.718623	0.827107	0.652914	0.769727	0.664996	0.7713	0.809972	0.812848	0.7732	0.696937	0.732447	0.866893	0.84346	0.898296	0.732786	0.699665	0.712621	0.821789	0.63062	0.877917	0.773834	0.833928	0.743716	0.836435	0.807851	0.817967	0.666507	0.805579	0.794111	0.811891	0.636994	0.788299	0.794829	0.626098	0.921451	0.902789	0.638592	0.642784	0.663156	0.904209	0.771004
Angers	ANG	47.47	-0.55	0.910872	0.663772	1	0.90253	0.805062	0.869789	0.844397	0.629245	0.767795	0.932566	0.773536	0.916313	0.770759	0.840865	0.853878	0.917064	0.766184	0.738431	0.693247	0.857075	0.953571	0.934156	0.880802	0.849373	0.760468	0.960179	0.762525	0.845163	0.718998	0.835737	0.793666	0.723363	0.810083	0.839802	0.722394	0.93246	0.764857	0.815011	0.888006	0.673529	0.658283	0.878013	0.925929	0.96684	0.757234	0.776584
Angouleme-Oisellerie	ANGOU	45.65	0.15	0.871563	0.788658	0.90253	1	0.880995	0.910809	0.918559	0.753564	0.866901	0.866585	0.800634	0.952689	0.859819	0.942214	0.849482	0.882381	0.859085	0.860141	0.818293	0.834874	0.888664	0.896248	0.893722	0.810617	0.863611	0.971681	0.832093	0.849522	0.829371	0.922287	0.860192	0.756071	0.833851	0.860924	0.827516	0.866045	0.922667	0.848311	0.831083	0.783589	0.761061	0.843633	0.867777	0.889031	0.86038	0.910197
Arbois	ARB	46.9	5.77	0.849174	0.845633	0.805062	0.880995	1	0.880314	0.922546	0.732542	0.851874	0.814947	0.902668	0.8876	0.870903	0.891619	0.833972	0.848359	0.953601	0.886171	0.898527	0.889408	0.846764	0.843247	0.976392	0.758064	0.934679	0.883606	0.951757	0.893519	0.932943	0.874656	0.962156	0.81553	0.956047	0.936914	0.842312	0.7749	0.93711	0.950038	0.746541	0.836906	0.851761	0.768211	0.803989	0.805175	0.900821	0.890645
Arcachon	ARC	44.66	-1.16	0.860097	0.718623	0.869789	0.910809	0.880314	1	0.896163	0.726975	0.874722	0.816254	0.841224	0.940806	0.891114	0.93972	0.826316	0.84121	0.858172	0.846651	0.766997	0.832618	0.849551	0.849816	0.868533	0.782697	0.861229	0.944412	0.810808	0.837306	0.814824	0.919832	0.846103	0.7212	0.830549	0.860966	0.845725	0.867481	0.92634	0.851493	0.797473	0.718832	0.714473	0.809301	0.8316	0.849402	0.8315	0.881425
Aubusson	AUB	45.95	2.16	0.839532	0.827107	0.844397	0.918559	0.922546	0.896163	1	0.756883	0.878924	0.835583	0.833916	0.937227	0.870262	0.937478	0.812525	0.868105	0.901986	0.906582	0.876137	0.847791	0.851753	0.863938	0.911151	0.766778	0.911531	0.917519	0.878071	0.858367	0.860754	0.918127	0.898615	0.742383	0.872507	0.891565	0.888206	0.810955	0.945765	0.878535	0.769299	0.826816	0.826879	0.780481	0.815462	0.839687	0.913218	0.930315
Auch	AUCH	43.65	0.58	0.725041	0.652914	0.629245	0.753564	0.732542	0.726975	0.756883	1	0.791114	0.595006	0.617549	0.83405	0.781338	0.791314	0.697962	0.605278	0.680273	0.774216	0.663959	0.618737	0.624152	0.598419	0.710587	0.672014	0.702505	0.82397	0.657965	0.59804	0.684979	0.802192	0.657315	0.584222	0.662103	0.635118	0.776879	0.668612	0.740158	0.669633	0.678385	0.660978	0.689539	0.708595	0.637453	0.629667	0.730565	0.746927
Bagnères de Bigorre	BDB	43.07	0.15	0.735425	0.769727	0.767795	0.866901	0.851874	0.874722	0.878924	0.791114	1	0.691045	0.799524	0.916081	0.863532	0.917434	0.706696	0.753925	0.864199	0.909307	0.829719	0.72582	0.733563	0.758347	0.822232	0.661426	0.879696	0.897139	0.790679	0.732556	0.825768	0.908325	0.81456	0.617908	0.752634	0.766567	0.91463	0.728026	0.907603	0.770742	0.677874	0.778738	0.745642	0.673341	0.693389	0.728101	0.868804	0.877672
Beauvais	BEA	49.43	2.08	0.966032	0.664996	0.932566	0.866585	0.814947	0.816254	0.835583	0.595006	0.691045	1	0.752579	0.886928	0.739638	0.805199	0.879207	0.922798	0.768567	0.706775	0.694894	0.901097	0.951919	0.936433	0.9015	0.8575	0.752787	0.909994	0.786201	0.90345	0.70703	0.776689	0.818606	0.794927	0.855018	0.879445	0.653396	0.898543	0.756207	0.862676	0.86089	0.683288	0.668971	0.855238	0.939563	0.963497	0.758843	0.778578
Belfort	BEL	47.63	6.87	0.795944	0.7713	0.773536	0.800634	0.902668	0.841224	0.833916	0.617549	0.799524	0.752579	1	0.810112	0.775672	0.797943	0.774269	0.78104	0.875563	0.806207	0.80783	0.836501	0.76733	0.768005	0.887897	0.694066	0.861895	0.802207	0.901171	0.852905	0.840154	0.785326	0.907002	0.731572	0.905413	0.888027	0.791587	0.693981	0.824272	0.900642	0.705359	0.777558	0.791419	0.704205	0.75002	0.739444	0.785192	0.80488
Bergerac	BER	44.85	0.48	0.866699	0.809972	0.916313	0.952689	0.8876	0.940806	0.937227	0.83405	0.916081	0.886928	0.810112	1	0.933988	0.968789	0.86481	0.915799	0.905338	0.931805	0.89496	0.838256	0.904921	0.912807	0.888523	0.861992	0.925429	0.950354	0.830792	0.868824	0.863107	0.963667	0.877808	0.797152	0.83332	0.877314	0.918152	0.895736	0.955541	0.84994	0.852134	0.854159	0.81416	0.873303	0.875737	0.902663	0.885958	0.945652
Biarritz	BIA	43.48	-1.57	0.787708	0.812848	0.770759	0.859819	0.870903	0.891114	0.870262	0.781338	0.863532	0.739638	0.775672	0.933988	1	0.898905	0.798493	0.800604	0.87441	0.86435	0.839153	0.776673	0.776034	0.776492	0.850718	0.750867	0.879987	0.910957	0.831046	0.785444	0.843065	0.912065	0.832861	0.721054	0.819278	0.832881	0.886563	0.777632	0.887157	0.821104	0.756917	0.806896	0.79351	0.758698	0.760677	0.766869	0.86228	0.865394
Bordeaux	BORD	44.83	-0.57	0.851757	0.7732	0.840865	0.942214	0.891619	0.93972	0.937478	0.791314	0.917434	0.805199	0.797943	0.968789	0.898905	1	0.826456	0.838386	0.86071	0.895845	0.802153	0.825934	0.824928	0.852199	0.882003	0.776467	0.869014	0.972059	0.837596	0.824394	0.814883	0.958348	0.846806	0.695533	0.829702	0.8378	0.891902	0.847517	0.925748	0.843413	0.795404	0.785655	0.770571	0.798691	0.832344	0.830314	0.878088	0.938166
Boulogne-sur-Mer	BSM	50.72	1.62	0.94297	0.696937	0.853878	0.849482	0.833972	0.826316	0.812525	0.697962	0.706696	0.879207	0.774269	0.86481	0.798493	0.826456	1	0.832017	0.80497	0.716069	0.739863	0.897345	0.884158	0.850633	0.887027	0.875304	0.805848	0.8644	0.803579	0.892729	0.747439	0.792374	0.836769	0.886485	0.845564	0.885068	0.701102	0.853817	0.807263	0.850035	0.837896	0.712016	0.730265	0.854764	0.906541	0.874103	0.772062	0.81189
Bourges	BOU	47.08	2.4	0.898449	0.732447	0.917064	0.882381	0.848359	0.84121	0.868105	0.605278	0.753925	0.922798	0.78104	0.915799	0.800604	0.838386	0.832017	1	0.81716	0.759458	0.778945	0.892467	0.940643	0.962121	0.942968	0.808956	0.821241	0.944053	0.836612	0.885466	0.752559	0.820292	0.866654	0.757399	0.888991	0.877684	0.726123	0.879029	0.808109	0.877153	0.811366	0.750815	0.723178	0.81335	0.898431	0.934248	0.879275	0.805431
Bron	BRON	45.73	4.92	0.83203	0.866893	0.766184	0.859085	0.953601	0.858172	0.901986	0.680273	0.864199	0.768567	0.875563	0.905338	0.87441	0.86071	0.80497	0.81716	1	0.881572	0.923634	0.853535	0.786509	0.796074	0.956637	0.696379	0.94837	0.899263	0.938499	0.858887	0.91632	0.866817	0.935404	0.727095	0.932393	0.897497	0.856749	0.731953	0.907144	0.925999	0.693005	0.868876	0.849672	0.713944	0.75231	0.770355	0.933487	0.857971
Carcassonne	CAR	43.22	2.35	0.739829	0.84346	0.738431	0.860141	0.886171	0.846651	0.906582	0.774216	0.909307	0.706775	0.806207	0.931805	0.86435	0.895845	0.716069	0.759458	0.881572	1	0.859861	0.746893	0.734022	0.75066	0.864125	0.657722	0.902794	0.891953	0.832504	0.777932	0.862184	0.904405	0.82852	0.656846	0.808165	0.798997	0.931502	0.718188	0.902203	0.808041	0.676062	0.840448	0.814922	0.692569	0.69155	0.712863	0.905304	0.885741
Chadrac	CHAD	45.07	3.9	0.728392	0.898296	0.693247	0.818293	0.898527	0.766997	0.876137	0.663959	0.829719	0.694894	0.80783	0.89496	0.839153	0.802153	0.739863	0.778945	0.923634	0.859861	1	0.775242	0.719208	0.754697	0.906707	0.653711	0.927026	0.854286	0.884439	0.774911	0.881995	0.831924	0.881968	0.673846	0.860119	0.831945	0.828201	0.666678	0.832343	0.843388	0.643484	0.891068	0.852179	0.665978	0.688148	0.703944	0.957114	0.795267
Charleville-Mézières	CHM	49.77	4.72	0.930477	0.732786	0.857075	0.834874	0.889408	0.832618	0.847791	0.618737	0.72582	0.901097	0.836501	0.838256	0.776673	0.825934	0.897345	0.892467	0.853535	0.746893	0.775242	1	0.904195	0.896867	0.93959	0.803423	0.834113	0.858461	0.875454	0.958378	0.798694	0.784728	0.897067	0.82007	0.921492	0.948827	0.695168	0.844388	0.815225	0.936477	0.790399	0.746979	0.761604	0.799437	0.899536	0.887623	0.808499	0.806984
Chartres	CHAR	48.45	1.5	0.943718	0.699665	0.953571	0.888664	0.846764	0.849551	0.851753	0.624152	0.733563	0.951919	0.76733	0.904921	0.776034	0.824928	0.884158	0.940643	0.786509	0.734022	0.719208	0.904195	1	0.95114	0.936611	0.870737	0.777882	0.941021	0.813003	0.893574	0.71254	0.8126	0.830579	0.791046	0.883027	0.865744	0.698418	0.91364	0.766498	0.881426	0.874829	0.703683	0.712321	0.881175	0.94791	0.958713	0.817498	0.787165
Chateauroux	CHAT	46.82	1.7	0.914146	0.712621	0.934156	0.896248	0.843247	0.849816	0.863938	0.598419	0.758347	0.936433	0.768005	0.912807	0.776492	0.852199	0.850633	0.962121	0.796074	0.75066	0.754697	0.896867	0.95114	1	0.929524	0.831173	0.80352	0.931587	0.804781	0.892155	0.741359	0.825801	0.841645	0.752193	0.874884	0.878728	0.705928	0.900505	0.822909	0.866007	0.833855	0.7174	0.707884	0.840917	0.930169	0.943753	0.825033	0.813977
Chatillon-sur-Seine	CSS	47.85	4.55	0.896893	0.821789	0.880802	0.893722	0.976392	0.868533	0.911151	0.710587	0.822232	0.9015	0.887897	0.888523	0.850718	0.882003	0.887027	0.942968	0.956637	0.864125	0.906707	0.93959	0.936611	0.929524	1	0.827854	0.946762	0.899536	0.946729	0.94974	0.901348	0.856336	0.979924	0.859625	0.964433	0.976005	0.819512	0.839065	0.937098	0.962687	0.815978	0.849801	0.837996	0.829122	0.898355	0.898372	0.896462	0.889178
Cherbourg	CHE	49.65	-1.65	0.894765	0.63062	0.849373	0.810617	0.758064	0.782697	0.766778	0.672014	0.661426	0.8575	0.694066	0.861992	0.750867	0.776467	0.875304	0.808956	0.696379	0.657722	0.653711	0.803423	0.870737	0.831173	0.827854	1	0.70672	0.903949	0.738078	0.800274	0.65186	0.763272	0.750599	0.838361	0.798303	0.788989	0.669385	0.889256	0.743101	0.794192	0.922218	0.663772	0.673412	0.913466	0.898548	0.871482	0.776521	0.724452
Clermont-Ferrand	CLF	45.78	3.08	0.812518	0.877917	0.760468	0.863611	0.934679	0.861229	0.911531	0.702505	0.879696	0.752787	0.861895	0.925429	0.879987	0.869014	0.805848	0.821241	0.94837	0.902794	0.927026	0.834113	0.777882	0.80352	0.946762	0.70672	1	0.89991	0.916666	0.849517	0.894057	0.874088	0.925777	0.734048	0.907779	0.879744	0.883657	0.728125	0.890403	0.896767	0.692316	0.849553	0.838558	0.700787	0.752668	0.759356	0.949981	0.867369
Cognac	COG	45.7	-0.33	0.879288	0.773834	0.960179	0.971681	0.883606	0.944412	0.917519	0.82397	0.897139	0.909994	0.802207	0.950354	0.910957	0.972059	0.8644	0.944053	0.899263	0.891953	0.854286	0.858461	0.941021	0.931587	0.899536	0.903949	0.89991	1	0.842314	0.881209	0.84543	0.950293	0.889563	0.791159	0.844973	0.885547	0.870041	0.928011	0.948448	0.868421	0.880015	0.82957	0.812447	0.888237	0.919959	0.945601	0.848824	0.938594
Colmar	COL	48.08	7.37	0.810764	0.833928	0.762525	0.832093	0.951757	0.810808	0.878071	0.657965	0.790679	0.786201	0.901171	0.830792	0.831046	0.837596	0.803579	0.836612	0.938499	0.832504	0.884439	0.875454	0.813003	0.804781	0.946729	0.738078	0.916666	0.842314	1	0.885342	0.899541	0.828615	0.952294	0.806178	0.969364	0.935673	0.782364	0.725722	0.886638	0.959674	0.704978	0.840393	0.855272	0.708545	0.783861	0.779881	0.90161	0.845169
Courcy	COUR	49.32	4	0.949163	0.743716	0.845163	0.849522	0.893519	0.837306	0.858367	0.59804	0.732556	0.90345	0.852905	0.868824	0.785444	0.824394	0.892729	0.885466	0.858887	0.777932	0.774911	0.958378	0.893574	0.892155	0.94974	0.800274	0.849517	0.881209	0.885342	1	0.800646	0.784697	0.900107	0.81577	0.92149	0.959773	0.71492	0.837167	0.805308	0.940202	0.796205	0.744668	0.752053	0.795308	0.885858	0.885377	0.830917	0.8086
Cran-Gevrier	CRG	45.9	6.1	0.747684	0.836435	0.718998	0.829371	0.932943	0.814824	0.860754	0.684979	0.825768	0.70703	0.840154	0.863107	0.843065	0.814883	0.747439	0.752559	0.91632	0.862184	0.881995	0.798694	0.71254	0.741359	0.901348	0.65186	0.894057	0.84543	0.899541	0.800646	1	0.842663	0.894661	0.711421	0.891748	0.862917	0.814067	0.681677	0.843856	0.878449	0.650935	0.847518	0.831756	0.649515	0.681907	0.701108	0.890443	0.818398
Dax	DAX	43.72	-1.05	0.801186	0.807851	0.835737	0.922287	0.874656	0.919832	0.918127	0.802192	0.908325	0.776689	0.785326	0.963667	0.912065	0.958348	0.792374	0.820292	0.866817	0.904405	0.831924	0.784728	0.8126	0.825801	0.856336	0.763272	0.874088	0.950293	0.828615	0.784697	0.842663	1	0.830383	0.699234	0.809893	0.81542	0.913716	0.818266	0.922739	0.816487	0.777305	0.817352	0.800255	0.771347	0.792035	0.809347	0.884618	0.921271
Dijon-Ouges	DIJ	47.32	5.02	0.857717	0.817967	0.793666	0.860192	0.962156	0.846103	0.898615	0.657315	0.81456	0.818606	0.907002	0.877808	0.832861	0.846806	0.836769	0.866654	0.935404	0.82852	0.881968	0.897067	0.830579	0.841645	0.979924	0.750599	0.925777	0.889563	0.952294	0.900107	0.894661	0.830383	1	0.770306	0.96114	0.941537	0.786446	0.769368	0.878086	0.954869	0.736279	0.82821	0.828599	0.73626	0.813845	0.816814	0.903168	0.830684
Dunkerque	DUN	51.05	2.37	0.847793	0.666507	0.723363	0.756071	0.81553	0.7212	0.742383	0.584222	0.617908	0.794927	0.731572	0.797152	0.721054	0.695533	0.886485	0.757399	0.727095	0.656846	0.673846	0.82007	0.791046	0.752193	0.859625	0.838361	0.734048	0.791159	0.806178	0.81577	0.711421	0.699234	0.770306	1	0.832278	0.789904	0.626002	0.709417	0.705214	0.812399	0.809085	0.697855	0.705433	0.794114	0.825247	0.764051	0.762682	0.695922
Entzheim	ENT	48.53	7.63	0.858973	0.805579	0.810083	0.833851	0.956047	0.830549	0.872507	0.662103	0.752634	0.855018	0.905413	0.83332	0.819278	0.829702	0.845564	0.888991	0.932393	0.808165	0.860119	0.921492	0.883027	0.874884	0.964433	0.798303	0.907779	0.844973	0.969364	0.92149	0.891748	0.809893	0.96114	0.832278	1	0.968902	0.747011	0.785947	0.892507	0.981696	0.768368	0.843586	0.846794	0.788755	0.862684	0.841025	0.881771	0.844937
Erneville-aux-Bois	EAB	48.73	5.4	0.92395	0.794111	0.839802	0.860924	0.936914	0.860966	0.891565	0.635118	0.766567	0.879445	0.888027	0.877314	0.832881	0.8378	0.885068	0.877684	0.897497	0.798997	0.831945	0.948827	0.865744	0.878728	0.976005	0.788989	0.879744	0.885547	0.935673	0.959773	0.862917	0.81542	0.941537	0.789904	0.968902	1	0.750549	0.81497	0.839553	0.972743	0.762046	0.803349	0.798477	0.774994	0.868887	0.853559	0.880044	0.830981
Foix	FOIX	42.97	1.6	0.70194	0.811891	0.722394	0.827516	0.842312	0.845725	0.888206	0.776879	0.91463	0.653396	0.791587	0.918152	0.886563	0.891902	0.701102	0.726123	0.856749	0.931502	0.828201	0.695168	0.698418	0.705928	0.819512	0.669385	0.883657	0.870041	0.782364	0.71492	0.814067	0.913716	0.786446	0.626002	0.747011	0.750549	1	0.697807	0.887353	0.751561	0.691092	0.805472	0.783385	0.679099	0.668683	0.680933	0.900808	0.860715
Groix	GRO	47.63	-3.47	0.921996	0.636994	0.93246	0.866045	0.7749	0.867481	0.810955	0.668612	0.728026	0.898543	0.693981	0.895736	0.777632	0.847517	0.853817	0.879029	0.731953	0.718188	0.666678	0.844388	0.91364	0.900505	0.839065	0.889256	0.728125	0.928011	0.725722	0.837167	0.681677	0.818266	0.769368	0.709417	0.785947	0.81497	0.697807	1	0.798837	0.794552	0.890428	0.659555	0.666743	0.895279	0.922952	0.933383	0.749753	0.787272
Gueret	GUE	46.17	1.87	0.862665	0.788299	0.764857	0.922667	0.93711	0.92634	0.945765	0.740158	0.907603	0.756207	0.824272	0.955541	0.887157	0.925748	0.807263	0.808109	0.907144	0.902203	0.832343	0.815225	0.766498	0.822909	0.937098	0.743101	0.890403	0.948448	0.886638	0.805308	0.843856	0.922739	0.878086	0.705214	0.892507	0.839553	0.887353	0.798837	1	0.902568	0.747193	0.803959	0.78761	0.759849	0.802618	0.768888	0.914883	0.917821
Hegeney	HEG	48.88	7.73	0.889732	0.794829	0.815011	0.848311	0.950038	0.851493	0.878535	0.669633	0.770742	0.862676	0.900642	0.84994	0.821104	0.843413	0.850035	0.877153	0.925999	0.808041	0.843388	0.936477	0.881426	0.866007	0.962687	0.794192	0.896767	0.868421	0.959674	0.940202	0.878449	0.816487	0.954869	0.812399	0.981696	0.972743	0.751561	0.794552	0.902568	1	0.757786	0.810372	0.826332	0.771833	0.84282	0.842543	0.876801	0.850399
Ile de Batz	IDB	48.73	-4	0.861554	0.626098	0.888006	0.831083	0.746541	0.797473	0.769299	0.678385	0.677874	0.86089	0.705359	0.852134	0.756917	0.795404	0.837896	0.811366	0.693005	0.676062	0.643484	0.790399	0.874829	0.833855	0.815978	0.922218	0.692316	0.880015	0.704978	0.796205	0.650935	0.777305	0.736279	0.809085	0.768368	0.762046	0.691092	0.890428	0.747193	0.757786	1	0.651689	0.665234	0.941889	0.910649	0.892059	0.720953	0.730162
Istres	IST	43.52	4.98	0.715221	0.921451	0.673529	0.783589	0.836906	0.718832	0.826816	0.660978	0.778738	0.683288	0.777558	0.854159	0.806896	0.785655	0.712016	0.750815	0.868876	0.840448	0.891068	0.746979	0.703683	0.7174	0.849801	0.663772	0.849553	0.82957	0.840393	0.744668	0.847518	0.817352	0.82821	0.697855	0.843586	0.803349	0.805472	0.659555	0.803959	0.810372	0.651689	1	0.918594	0.661005	0.662401	0.679563	0.922747	0.774734
La Ciotat	LCIO	43.17	5.6	0.694238	0.902789	0.658283	0.761061	0.851761	0.714473	0.826879	0.689539	0.745642	0.668971	0.791419	0.81416	0.79351	0.770571	0.730265	0.723178	0.849672	0.814922	0.852179	0.761604	0.712321	0.707884	0.837996	0.673412	0.838558	0.812447	0.855272	0.752053	0.831756	0.800255	0.828599	0.705433	0.846794	0.798477	0.783385	0.666743	0.78761	0.826332	0.665234	0.918594	1	0.67801	0.654222	0.671342	0.880136	0.763441
La Hague	LHAG	49.7	-1.95	0.890542	0.638592	0.878013	0.843633	0.768211	0.809301	0.780481	0.708595	0.673341	0.855238	0.704205	0.873303	0.758698	0.798691	0.854764	0.81335	0.713944	0.692569	0.665978	0.799437	0.881175	0.840917	0.829122	0.913466	0.700787	0.888237	0.708545	0.795308	0.649515	0.771347	0.73626	0.794114	0.788755	0.774994	0.679099	0.895279	0.759849	0.771833	0.941889	0.661005	0.67801	1	0.908599	0.878746	0.738901	0.745029
Le Havre	LHAV	49.5	0.13	0.945012	0.642784	0.925929	0.867777	0.803989	0.8316	0.815462	0.637453	0.693389	0.939563	0.75002	0.875737	0.760677	0.832344	0.906541	0.898431	0.75231	0.69155	0.688148	0.899536	0.94791	0.930169	0.898355	0.898548	0.752668	0.919959	0.783861	0.885858	0.681907	0.792035	0.813845	0.825247	0.862684	0.868887	0.668683	0.922952	0.802618	0.84282	0.910649	0.662401	0.654222	0.908599	1	0.950512	0.771247	0.780986
Le Mans	LMAN	48	0.2	0.938073	0.663156	0.96684	0.889031	0.805175	0.849402	0.839687	0.629667	0.728101	0.963497	0.739444	0.902663	0.766869	0.830314	0.874103	0.934248	0.770355	0.712863	0.703944	0.887623	0.958713	0.943753	0.898372	0.871482	0.759356	0.945601	0.779881	0.885377	0.701108	0.809347	0.816814	0.764051	0.841025	0.853559	0.680933	0.933383	0.768888	0.842543	0.892059	0.679563	0.671342	0.878746	0.950512	1	0.777557	0.7706
Les Estables	LEST	44.91	4.15	0.759589	0.904209	0.757234	0.86038	0.900821	0.8315	0.913218	0.730565	0.868804	0.758843	0.785192	0.885958	0.86228	0.878088	0.772062	0.879275	0.933487	0.905304	0.957114	0.808499	0.817498	0.825033	0.896462	0.776521	0.949981	0.848824	0.90161	0.830917	0.890443	0.884618	0.903168	0.762682	0.881771	0.880044	0.900808	0.749753	0.914883	0.876801	0.720953	0.922747	0.880136	0.738901	0.771247	0.777557	1	0.907581
Limoges	LIM	45.85	1.25	0.842387	0.771004	0.776584	0.910197	0.890645	0.881425	0.930315	0.746927	0.877672	0.778578	0.80488	0.945652	0.865394	0.938166	0.81189	0.805431	0.857971	0.885741	0.795267	0.806984	0.787165	0.813977	0.889178	0.724452	0.867369	0.938594	0.845169	0.8086	0.818398	0.921271	0.830684	0.695922	0.844937	0.830981	0.860715	0.787272	0.917821	0.850399	0.730162	0.774734	0.763441	0.745029	0.780986	0.7706	0.907581	1
Lyon	LYON	45.75	4.85	0.856312	0.884025	0.817487	0.89084	0.945149	0.878152	0.934326	0.765561	0.797416	0.851425	0.798672	0.921603	0.883446	0.878192	0.803946	0.915051	0.954575	0.890923	0.954332	0.859047	0.844695	0.895805	0.935193	0.804843	0.962444	0.884891	0.916932	0.875989	0.902303	0.883525	0.953396	0.802061	0.912134	0.917928	0.869416	0.765006	0.94797	0.919491	0.749513	0.878098	0.842309	0.759419	0.829076	0.837846	0.903882	0.913345
Marignane	MARI	43.42	5.22	0.710638	0.9444	0.704596	0.807499	0.874217	0.77981	0.855626	0.745237	0.824778	0.730779	0.780442	0.861493	0.871836	0.830049	0.760593	0.802617	0.897915	0.902457	0.91879	0.754075	0.768701	0.771901	0.849377	0.735029	0.896359	0.824326	0.856671	0.764101	0.863994	0.859516	0.843167	0.755833	0.84441	0.821182	0.878367	0.707227	0.863601	0.826639	0.725624	0.961835	0.935376	0.75869	0.73029	0.724217	0.908557	0.834356
Marseille	MARS	43.3	5.4	0.673351	0.899654	0.650705	0.752163	0.803821	0.765169	0.799818	0.627378	0.787096	0.643415	0.736096	0.812045	0.801749	0.771373	0.713148	0.720924	0.857895	0.794593	0.845943	0.726379	0.66541	0.697916	0.778263	0.627924	0.845577	0.764213	0.797178	0.730083	0.795813	0.803956	0.799552	0.614213	0.758688	0.769831	0.7979	0.644294	0.769547	0.769417	0.564588	0.876903	0.84446	0.613433	0.620177	0.64229	0.876045	0.754757
Metz-Augny	METZ	49.13	6.17	0.925049	0.77627	0.833288	0.864735	0.934123	0.850424	0.876498	0.655487	0.766907	0.868152	0.882688	0.862661	0.812586	0.848389	0.895019	0.879546	0.902702	0.793222	0.827259	0.94436	0.883679	0.867266	0.965534	0.80766	0.876936	0.875839	0.934027	0.953339	0.847447	0.813541	0.940732	0.822411	0.963958	0.976488	0.747467	0.811371	0.886762	0.974974	0.776854	0.789306	0.798087	0.788447	0.868434	0.856619	0.862217	0.854783
Monsols	MONS	46.22	4.52	0.819846	0.867341	0.83143	0.896057	0.949756	0.856226	0.918681	0.730954	0.857617	0.828111	0.849477	0.891038	0.87209	0.892078	0.851548	0.910011	0.960752	0.883292	0.940255	0.872729	0.883722	0.883065	0.952517	0.79439	0.960299	0.878395	0.924636	0.88235	0.909468	0.882589	0.946682	0.835439	0.921877	0.919882	0.854208	0.792542	0.933729	0.913337	0.776645	0.88115	0.861337	0.799368	0.839863	0.833659	0.930683	0.903709
Montelimar	MONT	44.57	4.75	0.753047	0.913803	0.763542	0.845585	0.858005	0.782447	0.878606	0.729235	0.837372	0.775802	0.758076	0.893998	0.855831	0.853047	0.781405	0.853357	0.924145	0.899325	0.934778	0.7722	0.806753	0.816647	0.866544	0.750821	0.92184	0.85405	0.856747	0.790599	0.875366	0.869596	0.854801	0.770055	0.841459	0.829877	0.873281	0.738626	0.879577	0.819665	0.722598	0.941014	0.89449	0.753892	0.752646	0.770429	0.937381	0.85814
Montpellier-Mauguio	MONTP	43.6	3.88	0.660717	0.781919	0.622252	0.734606	0.78303	0.711687	0.766161	0.714356	0.781924	0.588363	0.674293	0.857483	0.773149	0.777195	0.63476	0.634078	0.764635	0.883915	0.73129	0.640434	0.616246	0.618612	0.76216	0.525149	0.799854	0.824824	0.745715	0.662772	0.744847	0.785053	0.697631	0.56084	0.735566	0.684913	0.810497	0.578034	0.786061	0.720649	0.543494	0.769743	0.740142	0.590749	0.573359	0.588705	0.832254	0.781696
Mornant	MORN	45.62	4.67	0.822642	0.861196	0.834634	0.883861	0.944359	0.859754	0.910766	0.695009	0.857147	0.833706	0.82601	0.885217	0.844727	0.888776	0.82814	0.912593	0.965653	0.883187	0.948629	0.872187	0.879008	0.884588	0.947492	0.816998	0.965131	0.874658	0.934933	0.888596	0.907272	0.876855	0.952466	0.820665	0.924754	0.91257	0.856024	0.792592	0.932869	0.911314	0.7681	0.888993	0.862485	0.784247	0.8336	0.845439	0.929955	0.903421
Nancy	NANC	48.68	6.2	0.871651	0.735963	0.759633	0.811607	0.889441	0.802433	0.838932	0.644168	0.750132	0.794735	0.854194	0.842032	0.797061	0.766359	0.80821	0.779745	0.846554	0.754786	0.796691	0.844425	0.781983	0.763275	0.915819	0.73479	0.83718	0.850404	0.888133	0.855456	0.803779	0.770208	0.88108	0.745596	0.918089	0.891583	0.714861	0.762506	0.789279	0.926553	0.740119	0.777918	0.761484	0.74987	0.799322	0.775923	0.837507	0.772541
Nantes	NANT	47.22	-1.55	0.922441	0.649148	0.975348	0.894335	0.809993	0.873367	0.828805	0.617602	0.751663	0.932916	0.721911	0.908273	0.776557	0.853289	0.864032	0.916999	0.766616	0.724218	0.692037	0.860514	0.940864	0.929861	0.868149	0.852012	0.75013	0.949267	0.754578	0.852756	0.713834	0.830062	0.795752	0.731132	0.80614	0.835375	0.706076	0.941049	0.800376	0.814967	0.869172	0.673301	0.654892	0.874042	0.920989	0.965386	0.767338	0.789011
Narbonne	NAR	43.18	3	0.702931	0.842031	0.686533	0.803628	0.839795	0.786046	0.866785	0.772603	0.865427	0.675123	0.762126	0.872699	0.819554	0.84341	0.704049	0.723051	0.862021	0.934039	0.836094	0.720328	0.698754	0.686373	0.809497	0.642112	0.873991	0.836927	0.807467	0.745512	0.828738	0.869521	0.805329	0.691979	0.765033	0.768444	0.893876	0.669566	0.867037	0.775651	0.656218	0.857816	0.833445	0.653717	0.646665	0.682856	0.860352	0.842336
Nîmes	NIM	43.83	4.35	0.728328	0.952175	0.706239	0.857588	0.867324	0.750862	0.907791	0.794189	0.806267	0.753419	0.755428	0.880356	0.865152	0.848305	0.734883	0.819724	0.910793	0.917348	0.93879	0.732854	0.765358	0.772586	0.826771	0.744083	0.890671	0.832263	0.83346	0.763137	0.880002	0.876444	0.846796	0.736908	0.803679	0.801207	0.876777	0.689677	0.886497	0.805755	0.72876	0.970072	0.916622	0.749116	0.740979	0.748807	0.903325	0.882015
Orange	ORAN	44.13	4.8	0.76968	0.948819	0.774639	0.885697	0.91285	0.840798	0.929066	0.767423	0.850011	0.789831	0.824037	0.908135	0.886559	0.881179	0.782059	0.871349	0.94419	0.930816	0.960815	0.810857	0.829193	0.836805	0.887594	0.80007	0.929518	0.868097	0.879899	0.812706	0.93055	0.912418	0.897782	0.78421	0.872822	0.864682	0.907774	0.744966	0.92705	0.864843	0.768614	0.959055	0.937196	0.786149	0.799733	0.786428	0.930154	0.914138
Orléans	ORL	47.92	1.9	0.917238	0.714649	0.95281	0.892714	0.859794	0.848408	0.874678	0.603261	0.742249	0.947444	0.781404	0.918385	0.780006	0.832445	0.877285	0.960645	0.804009	0.74961	0.753918	0.900792	0.965793	0.960023	0.94136	0.859641	0.806108	0.948259	0.826328	0.903754	0.748514	0.80694	0.847728	0.778777	0.89013	0.893005	0.709817	0.902322	0.806949	0.881595	0.855308	0.736935	0.720095	0.859266	0.932628	0.959327	0.836226	0.78921
Paris	PAR	48.83	2.32	0.938434	0.706084	0.917644	0.867199	0.845348	0.840907	0.848342	0.599749	0.704556	0.948337	0.781542	0.891091	0.782801	0.815493	0.900518	0.931042	0.793106	0.702799	0.73483	0.925344	0.949759	0.946058	0.936481	0.872763	0.791938	0.915165	0.814621	0.916241	0.716166	0.784997	0.851101	0.811117	0.894501	0.894535	0.673156	0.903575	0.77351	0.884677	0.874151	0.705222	0.702667	0.872233	0.958408	0.950659	0.811877	0.777307
Pau-Uzein	PAU	43.3	-0.37	0.79114	0.785347	0.816715	0.902916	0.870646	0.909184	0.910398	0.792176	0.929471	0.765941	0.77621	0.962024	0.923938	0.934237	0.785119	0.820862	0.860428	0.909382	0.833446	0.784472	0.804557	0.826522	0.854705	0.783169	0.874734	0.939697	0.824641	0.785268	0.830215	0.952838	0.819594	0.712196	0.803253	0.808175	0.919964	0.816855	0.910256	0.81727	0.781108	0.796899	0.790971	0.785684	0.794731	0.804471	0.886173	0.891807
Perigueux	PERI	45.18	0.72	0.842683	0.792228	0.793904	0.921928	0.908353	0.907974	0.947642	0.79626	0.905701	0.778059	0.81734	0.974034	0.898734	0.953547	0.814148	0.80039	0.894735	0.922027	0.828215	0.799404	0.788984	0.805642	0.898942	0.744391	0.89546	0.960508	0.853147	0.819723	0.839295	0.940896	0.858759	0.695617	0.842338	0.843219	0.901549	0.792412	0.956072	0.857525	0.769485	0.799531	0.783132	0.767549	0.794973	0.785249	0.893908	0.941365
Perpignan	PERP	42.68	2.88	0.691517	0.821878	0.660274	0.795665	0.830295	0.787719	0.845477	0.753239	0.875082	0.634841	0.757315	0.907542	0.814379	0.834842	0.679982	0.67145	0.853931	0.939255	0.802485	0.677917	0.66011	0.665419	0.816053	0.622123	0.857782	0.860137	0.787545	0.703962	0.80066	0.857346	0.774128	0.622123	0.762122	0.728228	0.899498	0.64761	0.851774	0.766383	0.632002	0.823949	0.787763	0.653075	0.631208	0.636359	0.867936	0.81972
Phalsbourg	PHAL	48.77	7.27	0.872893	0.819665	0.782543	0.830321	0.949213	0.827856	0.860566	0.655492	0.764279	0.817605	0.902302	0.841823	0.820649	0.824082	0.853497	0.833131	0.92202	0.805547	0.839976	0.914366	0.837654	0.814295	0.963881	0.768433	0.891729	0.870158	0.956363	0.913258	0.879934	0.815559	0.946036	0.817992	0.978678	0.959762	0.759142	0.757468	0.874065	0.980286	0.745011	0.830999	0.848564	0.744378	0.819261	0.799412	0.877674	0.84261
Ramatuelle	RAM	43.22	6.62	0.628774	0.898276	0.575962	0.742235	0.821875	0.682108	0.793178	0.701724	0.764289	0.586014	0.735483	0.790522	0.775678	0.764954	0.671533	0.658662	0.813732	0.846078	0.846791	0.681768	0.618181	0.620498	0.774957	0.613265	0.818936	0.755552	0.804211	0.680687	0.817171	0.79797	0.78251	0.668609	0.765236	0.732298	0.790336	0.573448	0.781831	0.752026	0.600902	0.903616	0.889358	0.604205	0.595499	0.584856	0.855363	0.757376
Rennes	REN	48.08	-1.68	0.933759	0.667132	0.961029	0.892559	0.792039	0.854902	0.824497	0.651952	0.741355	0.930689	0.727636	0.901851	0.782372	0.832834	0.882862	0.903425	0.752865	0.730273	0.698862	0.868834	0.942807	0.920103	0.871257	0.907783	0.749278	0.937931	0.764268	0.868957	0.709044	0.823127	0.796381	0.743712	0.812363	0.853371	0.684344	0.95771	0.764571	0.819663	0.90854	0.685051	0.666286	0.908013	0.944066	0.964063	0.764009	0.778876
Romilly-sur-Seine	RSS	48.52	3.72	0.935214	0.768151	0.914556	0.896568	0.934146	0.873091	0.892063	0.711273	0.786023	0.934708	0.854547	0.878552	0.827054	0.879558	0.921261	0.94428	0.918321	0.80979	0.835543	0.952736	0.954461	0.932585	0.973777	0.853692	0.901439	0.907747	0.917724	0.973286	0.853426	0.827715	0.952719	0.860481	0.944753	0.975552	0.76885	0.872442	0.910145	0.951943	0.833672	0.80685	0.790166	0.854414	0.928112	0.931463	0.864568	0.870837
Rothau	ROT	48.45	7.22	0.846981	0.823798	0.774446	0.83428	0.955575	0.843475	0.882006	0.641875	0.803451	0.791582	0.952409	0.852397	0.836377	0.842833	0.82996	0.838873	0.920929	0.819603	0.863052	0.887141	0.813794	0.80632	0.951488	0.726291	0.911699	0.848171	0.956133	0.891367	0.8837	0.818109	0.950463	0.782993	0.963715	0.945347	0.797443	0.717044	0.886464	0.965613	0.710351	0.835278	0.843042	0.720311	0.791837	0.777584	0.891733	0.864004
Royan	ROY	45.63	-1.03	0.877826	0.74197	0.909148	0.922749	0.86568	0.93786	0.890688	0.730263	0.836034	0.869694	0.764423	0.920085	0.870677	0.933759	0.845257	0.875309	0.813722	0.810694	0.744804	0.849633	0.895162	0.896245	0.862864	0.829106	0.821962	0.953508	0.800354	0.850238	0.787168	0.905424	0.831961	0.742459	0.825235	0.855582	0.80669	0.910858	0.900182	0.838832	0.838238	0.73254	0.734008	0.840372	0.883326	0.898661	0.814892	0.886554
Saint Etienne	STE	45.43	4.4	0.802989	0.877634	0.753599	0.856639	0.947978	0.84598	0.914707	0.69634	0.875067	0.76894	0.861245	0.919663	0.880641	0.853292	0.811555	0.826777	0.959144	0.886931	0.942425	0.837571	0.773836	0.800579	0.946309	0.726182	0.958509	0.886548	0.936399	0.845356	0.918152	0.868798	0.92591	0.742832	0.911796	0.884	0.868538	0.72244	0.882889	0.904791	0.715401	0.872268	0.85695	0.699401	0.748546	0.772331	0.955596	0.848264
Saint-Didier de Baujeu	SDB	46.15	4.55	0.847848	0.872861	0.846632	0.900921	0.965705	0.882492	0.933786	0.753606	0.861519	0.853064	0.868108	0.906903	0.892443	0.90292	0.851695	0.92147	0.978835	0.899878	0.955479	0.891482	0.889629	0.889552	0.959745	0.827448	0.965135	0.889679	0.950379	0.898687	0.931805	0.894847	0.964867	0.841265	0.941238	0.940372	0.86808	0.813426	0.950319	0.934451	0.805772	0.908435	0.86977	0.829685	0.851894	0.858607	0.939501	0.91545
Saint-Flour	SFL	45.03	3.1	0.779754	0.881337	0.787975	0.846507	0.910618	0.814604	0.909036	0.757497	0.841604	0.798188	0.821464	0.898207	0.879125	0.850703	0.789241	0.879109	0.948503	0.902144	0.956129	0.826485	0.840419	0.835194	0.908776	0.764919	0.950159	0.862574	0.938197	0.940458	0.903689	0.877677	0.915795	0.7929	0.891864	0.87325	0.873744	0.757721	0.913448	0.874388	0.761886	0.91498	0.870819	0.785343	0.793276	0.808706	0.94894	0.872004
Saint-Genis-Laval	SGL	45.68	4.8	0.811312	0.860477	0.763864	0.856662	0.947651	0.844685	0.909499	0.686531	0.862425	0.765135	0.860551	0.908306	0.860814	0.864321	0.791882	0.831007	0.967673	0.894665	0.926478	0.843236	0.777574	0.805817	0.944418	0.677937	0.95463	0.881248	0.929554	0.850703	0.912965	0.864705	0.938259	0.712953	0.911725	0.891017	0.855451	0.723033	0.888659	0.901198	0.682462	0.860537	0.835002	0.695392	0.746377	0.766923	0.935869	0.850814
Saint-Laurent de la Pree	SLP	45.98	-1.03	0.906604	0.752457	0.926535	0.952127	0.888285	0.937687	0.914851	0.733926	0.867518	0.89809	0.788443	0.947724	0.870229	0.959299	0.870973	0.905802	0.847742	0.856861	0.790589	0.878326	0.926051	0.917434	0.899072	0.828846	0.859991	0.978254	0.828547	0.882526	0.801542	0.911716	0.86474	0.766474	0.850095	0.881799	0.818328	0.916454	0.93016	0.866397	0.833794	0.761569	0.756469	0.860327	0.901458	0.915949	0.835949	0.915104
Saint-Martin d'Heres	SMH	45.17	5.77	0.751467	0.867482	0.70602	0.806632	0.911157	0.814068	0.862994	0.646286	0.841752	0.688958	0.886529	0.885233	0.847475	0.8195	0.748412	0.753876	0.934892	0.856707	0.905733	0.789242	0.705745	0.719926	0.899349	0.641791	0.922739	0.853972	0.911593	0.801991	0.885127	0.838389	0.888932	0.675383	0.881612	0.844102	0.852571	0.659404	0.832341	0.873899	0.659903	0.866077	0.848351	0.663197	0.678194	0.693492	0.911415	0.803844
Saint-Veran	SV	45.92	4.53	0.840404	0.88377	0.847786	0.89858	0.956291	0.870362	0.934929	0.752213	0.861209	0.854971	0.858766	0.912129	0.890095	0.906122	0.842045	0.923122	0.982005	0.906758	0.95528	0.887693	0.890576	0.889046	0.950275	0.842254	0.962012	0.889043	0.943366	0.891119	0.9241	0.90195	0.954704	0.842381	0.932683	0.925796	0.879374	0.798272	0.949867	0.925451	0.815778	0.91553	0.896221	0.831189	0.848227	0.856002	0.930845	0.919452
Sete	SET	43.4	3.68	0.749232	0.819159	0.714581	0.834376	0.861945	0.836101	0.879528	0.772403	0.893976	0.663768	0.784552	0.91255	0.830918	0.887429	0.707862	0.715417	0.856231	0.930334	0.816283	0.716929	0.682662	0.715736	0.828009	0.658579	0.867673	0.881953	0.81102	0.731193	0.823708	0.894045	0.792071	0.615052	0.796078	0.752543	0.900396	0.6914	0.883471	0.803221	0.674668	0.826793	0.783119	0.680054	0.678498	0.681689	0.897718	0.856292
Strasbourg	STR	48.58	7.75	0.864261	0.795034	0.770587	0.8237	0.947727	0.830587	0.865469	0.615016	0.769525	0.805255	0.899075	0.837024	0.804573	0.821986	0.83372	0.836446	0.919768	0.804735	0.834308	0.906243	0.82294	0.81212	0.961147	0.740723	0.89819	0.848526	0.962601	0.912887	0.874594	0.800928	0.95044	0.776574	0.985059	0.963018	0.746664	0.741734	0.882072	0.982719	0.704103	0.797838	0.822461	0.710105	0.797219	0.788524	0.881752	0.844677
Toulon	TLO	43.12	5.93	0.641512	0.855483	0.640921	0.742886	0.77928	0.691556	0.760733	0.702554	0.778186	0.621281	0.67409	0.794715	0.78487	0.779413	0.688494	0.664562	0.789031	0.802058	0.788671	0.672774	0.628082	0.637669	0.752226	0.620797	0.790875	0.775811	0.755588	0.679111	0.765156	0.791808	0.750489	0.641769	0.717403	0.723379	0.789075	0.60268	0.765778	0.707658	0.621697	0.850644	0.827415	0.625251	0.618463	0.63961	0.806046	0.746855
Toulouse-Blagnac	TOU	43.6	1.43	0.763441	0.836224	0.750002	0.871258	0.886837	0.860267	0.915308	0.782129	0.934499	0.709415	0.782372	0.943215	0.875997	0.911828	0.750551	0.765755	0.886038	0.954102	0.864848	0.752372	0.742483	0.754177	0.866444	0.688673	0.91282	0.915911	0.83244	0.773067	0.852226	0.929983	0.833572	0.661218	0.80676	0.802113	0.950413	0.721403	0.909159	0.813208	0.693002	0.831134	0.805049	0.68973	0.710069	0.73061	0.91499	0.895592
Tulle	TUL	45.27	1.77	0.856186	0.73057	0.793953	0.898237	0.87033	0.905442	0.91159	0.71878	0.89496	0.785303	0.76855	0.91424	0.843648	0.92849	0.803135	0.812727	0.868205	0.865354	0.785878	0.813055	0.790627	0.81901	0.875217	0.7341	0.865316	0.919147	0.824839	0.821827	0.796475	0.889428	0.840164	0.674663	0.817904	0.833262	0.862006	0.816301	0.925194	0.842306	0.732961	0.73611	0.720283	0.738586	0.792365	0.793884	0.850032	0.918172
Valleraugue	VAL	44.08	3.64	0.73974	0.90652	0.744392	0.849818	0.880343	0.784959	0.901759	0.713132	0.838986	0.751687	0.799944	0.910499	0.835706	0.87249	0.727457	0.826895	0.896129	0.917826	0.923821	0.772634	0.776417	0.788312	0.871359	0.688548	0.912141	0.861293	0.866034	0.797101	0.851673	0.885768	0.875618	0.714124	0.843622	0.832185	0.87382	0.717414	0.883543	0.828122	0.690573	0.906952	0.882673	0.70526	0.723574	0.749808	0.946387	0.857264
Vichy-Charmeil	VIC	46.12	3.42	0.851601	0.835968	0.865727	0.894076	0.952822	0.856378	0.935015	0.723467	0.857178	0.860861	0.849301	0.906831	0.864328	0.899023	0.847751	0.934343	0.965283	0.898891	0.931235	0.876734	0.894543	0.89645	0.963079	0.801825	0.961469	0.898336	0.927555	0.899971	0.902991	0.87943	0.959043	0.811627	0.925028	0.933667	0.87093	0.816861	0.941288	0.917092	0.786516	0.876801	0.838288	0.801159	0.851061	0.872287	0.941195	0.887335
Villefranche sur Saône	VSS	45.98	4.72	0.851385	0.854054	0.834325	0.890051	0.956912	0.846085	0.911138	0.716825	0.838585	0.859821	0.866342	0.895527	0.860975	0.883751	0.844649	0.919566	0.970999	0.888011	0.949374	0.890186	0.882328	0.893506	0.953956	0.834645	0.962421	0.87676	0.935721	0.896405	0.925507	0.871672	0.958986	0.852393	0.935181	0.925777	0.849871	0.806195	0.932044	0.925295	0.802645	0.895848	0.858817	0.823449	0.853441	0.851982	0.918541	0.907794
Other Countries
Central England	CET	51.5	-0.12	0.858018	0.5452	0.727047	0.710616	0.758997	0.755666	0.707617	0.628978	0.650334	0.722304	0.653766	0.801345	0.697617	0.742207	0.820567	0.617105	0.669322	0.670221	0.557608	0.746665	0.705156	0.637981	0.769065	0.756531	0.6771	0.842766	0.685185	0.737425	0.635469	0.695411	0.6929	0.721258	0.715294	0.728595	0.648004	0.722534	0.709042	0.75591	0.750969	0.548914	0.559848	0.733433	0.792423	0.726061	0.651237	0.718773
De Bilt (Netherland)	BILT	52.1	5.18	0.804532	0.541962	0.636092	0.603167	0.745875	0.680071	0.640739	0.546019	0.548229	0.659293	0.695984	0.698919	0.644837	0.5977	0.802286	0.579634	0.656768	0.550881	0.535385	0.764983	0.6465	0.582062	0.760861	0.682462	0.640188	0.728398	0.704957	0.738352	0.617856	0.569016	0.694493	0.698447	0.750166	0.755451	0.556061	0.624104	0.584497	0.793639	0.648923	0.547812	0.567072	0.652036	0.710451	0.641925	0.642777	0.604756
Karlsruhe (Germany)	KARL	49.02	8.38	0.783864	0.670042	0.543106	0.650834	0.898515	0.704096	0.729238	0.57886	0.694381	0.572573	0.795308	0.778841	0.71852	0.707687	0.708461	0.567258	0.816962	0.751737	0.690271	0.71727	0.556717	0.541946	0.877133	0.514501	0.785739	0.811334	0.880581	0.749978	0.786	0.688263	0.781357	0.582546	0.910545	0.798468	0.732005	0.499978	0.761553	0.922368	0.498456	0.677366	0.681998	0.479395	0.540063	0.544038	0.808411	0.748403
Milan (Italy)	MIL	45.46	9.19	0.620339	0.813083	0.580009	0.699891	0.804622	0.723684	0.773927	0.588441	0.761001	0.590583	0.791105	0.773083	0.789274	0.725722	0.66267	0.661877	0.838701	0.769501	0.834246	0.68385	0.603824	0.633819	0.802039	0.592822	0.836188	0.756309	0.839853	0.694267	0.777577	0.748071	0.778639	0.63042	0.789585	0.733435	0.784705	0.537925	0.738578	0.777849	0.580937	0.788646	0.770182	0.566744	0.600226	0.583679	0.898812	0.751059
Stuttgart (Germany)	STU	48.72	9.22	0.819015	0.808077	0.694867	0.775034	0.922408	0.771313	0.835288	0.61464	0.712339	0.753233	0.892468	0.777019	0.797159	0.776771	0.788056	0.785179	0.892292	0.770567	0.820237	0.869814	0.770763	0.761355	0.918989	0.706045	0.858864	0.795204	0.947175	0.868204	0.860407	0.77104	0.920494	0.774048	0.962267	0.930564	0.72477	0.685373	0.836977	0.955188	0.661929	0.81169	0.822898	0.665472	0.746337	0.727503	0.876682	0.797355
Geneve (Switzerland)	GEN	46.12	6.09	0.776791	0.874242	0.729095	0.83793	0.925606	0.820164	0.878197	0.697818	0.812364	0.748213	0.851033	0.857706	0.848294	0.837659	0.755023	0.794028	0.941219	0.859055	0.90051	0.821133	0.773545	0.778216	0.902068	0.718999	0.898486	0.830462	0.926824	0.829131	0.897382	0.851424	0.913781	0.726328	0.909126	0.881697	0.823919	0.716332	0.888012	0.905772	0.700569	0.87613	0.879087	0.726745	0.733149	0.744727	0.896861	0.850187
Luxembourg (Luxembourg)	LUX	49.37	6.12	0.872779	0.722125	0.815259	0.818785	0.884862	0.813277	0.81301	0.647636	0.684221	0.8786	0.796489	0.796677	0.73956	0.814373	0.861674	0.871285	0.838563	0.74269	0.752883	0.938662	0.907102	0.886993	0.912653	0.815375	0.835396	0.845427	0.855809	0.930331	0.800703	0.777294	0.894345	0.819473	0.910837	0.924883	0.669102	0.81675	0.841988	0.921061	0.772191	0.710925	0.778989	0.774865	0.90053	0.841746	0.744058	0.825228
Navacerrada (Spain)	NAV	40.46	-4	0.495716	0.681322	0.49147	0.629089	0.602752	0.520008	0.649675	0.658566	0.583701	0.517689	0.488515	0.678909	0.704608	0.654438	0.526714	0.566828	0.636088	0.704858	0.706395	0.467529	0.532734	0.50315	0.558199	0.573846	0.650342	0.605077	0.568694	0.498921	0.640248	0.679443	0.569126	0.577972	0.496335	0.49855	0.654372	0.485505	0.657702	0.503308	0.60751	0.721235	0.690154	0.602218	0.504893	0.558908	0.652236	0.644186
Salamanca (Spain)	SAL	40.56	-5.29	0.444171	0.520617	0.505403	0.574242	0.530717	0.495241	0.605715	0.548098	0.574962	0.493371	0.438039	0.587865	0.578746	0.587783	0.474719	0.53091	0.582489	0.637968	0.610408	0.439963	0.511224	0.457329	0.514078	0.519773	0.592923	0.575136	0.518915	0.452529	0.557978	0.594626	0.518736	0.532522	0.465533	0.430706	0.563091	0.448944	0.600041	0.455994	0.557281	0.599652	0.572231	0.527889	0.485397	0.542394	0.566746	0.577354
				p-values
City	Abb	Lat (°N)	Long (°E)	AB	AEP	ANG	ANGOU	ARB	ARC	AUB	AUCH	BDB	BEA	BEL	BER	BIA	BORD	BSM	BOU	BRON	CAR	CHAD	CHM	CHAR	CHAT	CSS	CHE	CLF	COG	COL	COUR	CRG	DAX	DIJ	DUN	ENT	EAB	FOIX	GRO	GUE	HEG	IDB	IST	LCIO	LHAG	LHAV	LMAN	LEST	LIM
France
Abbeville	AB	50.1	1.83	0
Aix-En-Provence	AEP	43.53	5.43	1.1272e-11	0
Angers	ANG	47.47	-0.55	0	1.11022e-16	0
Angouleme-Oisellerie	ANGOU	45.65	0.15	0	0	0	0
Arbois	ARB	46.9	5.77	0	0	0	0	0
Arcachon	ARC	44.66	-1.16	0	0	0	0	0	0
Aubusson	AUB	45.95	2.16	0	0	0	0	0	0	0
Auch	AUCH	43.65	0.58	9.21485e-15	2.22045e-16	1.79856e-14	0	0	0	0	0
Bagnères de Bigorre	BDB	43.07	0.15	7.88258e-15	0	0	0	0	0	0	0	0
Beauvais	BEA	49.43	2.08	0	0	0	0	0	0	0	3.95017e-13	0	0
Belfort	BEL	47.63	6.87	0	0	0	0	0	0	0	1.08957e-12	0	0	0
Bergerac	BER	44.85	0.48	0	0	0	0	0	0	0	0	0	0	0	0
Biarritz	BIA	43.48	-1.57	0	0	0	0	0	0	0	0	0	0	0	0	0
Bordeaux	BORD	44.83	-0.57	0	0	0	0	0	0	0	0	0	0	0	0	0	0
Boulogne-sur-Mer	BSM	50.72	1.62	0	1.11022e-16	0	0	0	0	0	2.22045e-16	1.11022e-16	0	0	0	0	0	0
Bourges	BOU	47.08	2.4	0	0	0	0	0	0	0	1.21125e-13	0	0	0	0	0	0	0	0
Bron	BRON	45.73	4.92	0	0	0	0	0	0	0	0	0	0	0	0	0	0	0	0	0
Carcassonne	CAR	43.22	2.35	1.33227e-15	0	0	0	0	0	0	0	0	0	0	0	0	0	0	0	0	0
Chadrac	CHAD	45.07	3.9	5.9952e-15	0	0	0	0	0	0	1.11022e-16	0	0	0	0	0	0	0	0	0	0	0
Charleville-Mézières	CHM	49.77	4.72	0	0	0	0	0	0	0	5.02931e-14	0	0	0	0	0	0	0	0	0	0	0	0
Chartres	CHAR	48.45	1.5	0	0	0	0	0	0	0	1.23235e-14	0	0	0	0	0	0	0	0	0	0	0	0	0
Chateauroux	CHAT	46.82	1.7	0	0	0	0	0	0	0	2.68008e-13	0	0	0	0	0	0	0	0	0	0	0	0	0	0
Chatillon-sur-Seine	CSS	47.85	4.55	0	0	0	0	0	0	0	1.54765e-13	0	0	0	0	0	0	0	0	0	0	0	0	0	0	0
Cherbourg	CHE	49.65	-1.65	0	2.59015e-13	0	0	0	0	0	2.33147e-15	2.13163e-14	0	1.11022e-16	0	0	0	0	0	1.11022e-16	1.05471e-14	1.72085e-14	0	0	0	0	0
Clermont-Ferrand	CLF	45.78	3.08	0	0	0	0	0	0	0	0	0	0	0	0	0	0	0	0	0	0	0	0	0	0	0	0	0
Cognac	COG	45.7	-0.33	0	3.9968e-15	0	0	0	0	0	0	0	0	2.22045e-16	0	0	0	0	0	0	0	0	0	0	0	0	0	0	0
Colmar	COL	48.08	7.37	0	0	0	0	0	0	0	4.30767e-14	0	0	0	0	0	0	0	0	0	0	0	0	0	0	0	0	0	0	0
Courcy	COUR	49.32	4	0	0	0	0	0	0	0	2.79776e-13	0	0	0	0	0	0	0	0	0	0	0	0	0	0	0	0	0	0	0	0
Cran-Gevrier	CRG	45.9	6.1	4.44089e-16	0	0	0	0	0	0	0	0	0	0	0	0	0	0	0	0	0	0	0	0	0	0	2.16493e-14	0	0	0	0	0
Dax	DAX	43.72	-1.05	0	0	0	0	0	0	0	0	0	0	0	0	0	0	0	0	0	0	0	0	0	0	0	0	0	0	0	0	0	0
Dijon-Ouges	DIJ	47.32	5.02	0	0	0	0	0	0	0	2.22045e-16	0	0	0	0	0	0	0	0	0	0	0	0	0	0	0	0	0	0	0	0	0	0	0
Dunkerque	DUN	51.05	2.37	0	0	0	0	0	0	0	1.30762e-12	3.08087e-13	0	0	0	0	0	0	0	0	1.11022e-16	0	0	0	0	0	0	0	3.33067e-16	0	0	0	0	0	0
Entzheim	ENT	48.53	7.63	0	0	0	0	0	0	0	9.36173e-12	7.77156e-16	0	0	0	0	0	0	0	0	0	0	0	0	0	0	0	0	0	0	0	0	0	0	0	0
Erneville-aux-Bois	EAB	48.73	5.4	0	0	0	0	0	0	0	2.9976e-15	0	0	0	0	0	0	0	0	0	0	0	0	0	0	0	0	0	0	0	0	0	0	0	0	0	0
Foix	FOIX	42.97	1.6	4.05009e-13	0	0	0	0	0	0	0	0	3.33067e-16	0	0	0	0	3.33067e-16	0	0	0	0	0	0	0	0	7.99361e-15	0	0	0	0	0	0	0	2.08722e-14	1.77636e-15	0	0
Grois	GRO	47.63	-3.47	0	5.21805e-15	0	0	0	0	0	1.11022e-16	0	0	1.11022e-16	0	0	0	0	0	0	0	1.11022e-16	0	0	0	0	0	0	0	0	0	0	0	0	0	0	0	0	0
Gueret	GUE	46.17	1.87	0	0	0	0	0	0	0	0	0	0	0	0	0	0	0	0	0	0	0	0	0	0	0	0	0	0	0	0	0	0	0	0	0	0	0	0	0
Hegeney	HEG	48.88	7.73	0	0	0	0	0	0	0	2.91656e-13	0	0	0	0	0	0	0	0	0	0	0	0	0	0	0	0	0	0	0	0	0	0	0	0	0	0	0	0	0	0
Ile de Batz	IDB	48.73	-4	0	4.29101e-13	0	0	0	0	0	9.99201e-16	2.66454e-15	0	0	0	0	0	0	0	1.11022e-16	9.99201e-16	5.88418e-14	0	0	0	0	0	1.11022e-16	0	1.11022e-16	0	2.42029e-14	0	0	0	0	0	4.44089e-16	0	0	0	0
Istres	IST	43.52	4.98	3.05311e-14	0	1.11022e-16	0	0	0	0	2.22045e-16	0	0	0	0	0	0	0	0	0	0	0	0	0	0	0	4.88498e-15	0	0	0	0	0	0	0	0	0	0	0	2.22045e-16	0	0	2.20934e-14	0
La Ciotat	LCIO	43.17	5.6	3.39506e-13	0	4.44089e-16	0	0	0	0	0	0	0	0	0	0	0	0	0	0	0	0	0	0	0	0	1.44329e-15	0	0	0	0	0	0	0	0	0	0	0	1.11022e-16	0	0	4.10783e-15	0	0
La Hague	LHAG	49.7	-1.95	0	4.68514e-14	0	0	0	0	0	0	1.88738e-15	0	0	0	0	0	0	0	0	0	1.55431e-15	0	0	0	0	0	0	0	0	0	1.24345e-14	0	0	0	0	0	8.88178e-16	0	0	0	0	2.88658e-15	3.33067e-16	0
Le Havre	LHAV	49.5	0.13	0	3.71925e-14	0	0	0	0	0	9.12603e-14	2.22045e-16	0	0	0	0	0	0	0	0	1.11022e-16	1.11022e-16	0	0	0	0	0	0	0	0	0	2.22045e-16	0	0	0	0	0	4.77396e-15	0	0	0	0	3.21965e-15	9.21485e-15	0	0
Le Mans	LMAN	48	0.2	0	0	0	0	0	0	0	6.10623e-15	0	0	0	0	0	0	0	0	0	0	0	0	0	0	0	0	0	0	0	0	0	0	0	0	0	0	0	0	0	0	0	0	0	0	0	0
Les Estables	LEST	44.91	4.15	5.9619e-14	0	4.47087e-13	0	0	0	0	1.53677e-12	0	4.21885e-14	3.66374e-15	0	0	0	8.10463e-15	0	0	0	0	0	0	0	0	4.55191e-15	0	0	0	0	0	0	0	2.63123e-14	0	0	0	1.2379e-13	0	0	2.83262e-12	0	0	4.2244e-13	8.99281e-15	3.88578e-15	0
Limoges	LIM	45.85	1.25	0	0	0	0	0	0	0	0	0	0	0	0	0	0	0	0	0	0	0	0	0	0	0	0	0	0	0	0	0	0	0	0	0	0	0	0	0	0	0	0	0	0	0	0	0	0
Lyon	LYON	45.75	4.85	1.85363e-12	1.87628e-14	1.16879e-09	6.10623e-15	0	9.37472e-13	0	8.69348e-09	3.47201e-09	1.73328e-12	1.10982e-09	0	2.05391e-14	4.62963e-14	2.45727e-10	1.11022e-16	0	6.10623e-15	0	6.66911e-13	3.85858e-12	2.55351e-15	0	2.26662e-10	0	1.63203e-14	0	6.42819e-14	7.77156e-16	2.03171e-14	0	2.90785e-10	1.11022e-16	0	2.92943e-12	5.75303e-09	0	0	1.71444e-08	4.69624e-14	5.07805e-12	8.60929e-09	2.15532e-11	8.38829e-12	5.55112e-16	1.11022e-16
Marignane	MARI	43.42	5.22	5.26246e-14	0	4.2899e-13	0	0	0	0	6.66134e-16	0	2.9976e-15	0	0	0	0	0	0	0	0	0	1.11022e-16	0	0	0	1.77636e-15	0	0	0	0	0	0	0	1.11022e-16	0	0	0	5.50671e-14	0	0	5.77316e-15	0	0	1.11022e-16	3.21965e-15	6.99441e-15	0	0
Marseille	MARS	43.3	5.4	4.18177e-12	0	6.66134e-16	0	0	0	0	1.05471e-14	0	7.77156e-16	0	0	0	0	0	0	0	0	0	0	0	0	0	5.83755e-13	0	3.40838e-14	0	0	0	0	0	5.31797e-14	1.11022e-16	0	0	3.55271e-15	0	0	2.91016e-10	0	0	1.32827e-12	8.20677e-13	6.66134e-16	0	0
Metz-Augny	METZ	49.13	6.17	0	0	0	0	0	0	0	3.26406e-14	0	0	0	0	0	0	0	0	0	0	0	0	0	0	0	0	0	0	0	0	0	0	0	0	0	0	0	0	0	0	0	0	0	0	0	0	0	0
Monsols	MONS	46.22	4.52	0	0	0	0	0	0	0	6.56142e-14	0	0	0	0	0	0	0	0	0	0	0	0	0	0	0	0	0	0	0	0	0	0	0	0	0	0	0	0	0	0	1.11022e-16	0	0	0	0	0	0	0
Montelimar	MONT	44.57	4.75	2.22045e-16	0	2.22045e-16	0	0	0	0	3.66374e-15	0	0	1.11022e-16	0	0	0	0	0	0	0	0	0	0	0	0	1.11022e-16	0	0	0	0	0	0	0	0	0	0	0	6.66134e-16	0	0	5.88418e-15	0	0	1.11022e-16	1.11022e-16	0	0	0
Montpellier-Mauguio	MONTP	43.6	3.88	1.07043e-11	0	2.56462e-14	0	0	0	0	0	0	4.33764e-13	1.22125e-15	0	0	0	3.5616e-13	1.22125e-15	0	0	0	2.55351e-15	1.23235e-14	1.90958e-14	1.11022e-16	5.38356e-09	0	0	0	0	0	0	0	1.24903e-11	1.55431e-15	0	0	4.74709e-12	0	3.33067e-16	1.2172e-09	0	0	8.80107e-12	5.89035e-11	3.35953e-13	0	0
Mornant	MORN	45.62	4.67	0	0	0	0	0	0	0	9.00402e-12	0	0	0	0	0	0	0	0	0	0	0	0	0	0	0	0	0	0	0	0	0	0	0	0	0	0	0	0	0	0	1.44329e-15	0	0	1.11022e-16	0	0	0	0
Nancy	NANC	48.68	6.2	0	0	0	0	0	0	0	8.88178e-16	0	0	0	0	0	0	0	0	0	0	0	0	0	0	0	0	0	0	0	0	0	0	0	0	0	0	0	0	0	0	0	0	0	0	0	0	0	0
Nantes	NANT	47.22	-1.55	0	3.33067e-16	0	0	0	0	0	2.76446e-14	0	0	0	0	0	0	0	0	0	0	0	0	0	0	0	0	0	0	0	0	0	0	0	0	0	0	0	0	0	0	0	0	1.11022e-16	0	0	0	1.4766e-14	0
Narbonne	NAR	43.18	3	1.28342e-13	0	2.22045e-16	0	0	0	0	0	0	2.22045e-16	0	0	0	0	0	0	0	0	0	0	0	0	0	6.91669e-14	0	0	0	0	0	0	0	0	0	0	0	3.33067e-16	0	0	1.26565e-14	0	0	7.32747e-15	2.33147e-14	1.11022e-16	0	0
Nîmes	NIM	43.83	4.35	6.37255e-10	0	1.43526e-08	1.11022e-16	0	3.3854e-10	0	1.28386e-12	1.59828e-12	4.90739e-11	9.67696e-11	0	0	5.55112e-16	2.50855e-10	3.45279e-14	0	0	0	2.97455e-10	1.58732e-11	7.75646e-12	1.34337e-14	1.13575e-10	0	6.21725e-15	5.21805e-15	1.96805e-11	0	0	6.66134e-16	2.113e-10	2.56906e-13	3.44169e-13	1.11022e-16	8.03165e-09	0	2.00284e-13	4.17551e-10	0	0	7.25754e-11	1.48939e-10	7.46232e-11	0	0
Orange	ORAN	44.13	4.8	1.05271e-12	0	3.94673e-12	0	0	5.55112e-16	0	1.34415e-12	1.11022e-16	6.35048e-14	1.88738e-15	0	0	0	1.61871e-13	0	0	0	0	4.10783e-15	3.33067e-16	1.11022e-16	0	1.74305e-14	0	0	0	3.10862e-15	0	0	0	1.25455e-13	0	0	0	8.78553e-12	0	0	7.49734e-13	0	0	9.9365e-14	1.82077e-14	9.61453e-14	0	0
Orléans	ORL	47.92	1.9	0	0	0	0	0	0	0	1.53322e-13	0	0	0	0	0	0	0	0	0	0	0	0	0	0	0	0	0	0	0	0	0	0	0	0	0	0	0	0	0	0	0	0	0	0	0	0	0	0
Paris	PAR	48.83	2.32	0	0	0	0	0	0	0	2.30038e-13	0	0	0	0	0	0	0	0	0	0	0	0	0	0	0	0	0	0	0	0	0	0	0	0	0	0	0	0	0	0	0	0	0	0	0	0	0	0
Pau-Uzein	PAU	43.3	-0.37	0	0	0	0	0	0	0	0	0	0	0	0	0	0	0	0	0	0	0	0	0	0	0	0	0	0	0	0	0	0	0	0	0	0	0	0	0	0	0	0	0	0	0	0	0	0
Perigueux	PERI	45.18	0.72	0	0	0	0	0	0	0	0	0	0	0	0	0	0	0	0	0	0	0	0	0	0	0	0	0	0	0	0	0	0	0	0	0	0	0	0	0	0	0	0	0	0	0	0	0	0
Perpignan	PERP	42.68	2.88	4.5719e-13	0	2.22045e-16	0	0	0	0	0	0	1.44329e-15	0	0	0	0	1.55431e-15	0	0	0	0	0	0	0	0	6.64135e-13	0	0	0	0	0	0	0	1.23235e-14	0	0	0	1.33227e-15	0	0	2.21601e-13	0	0	7.99361e-15	1.44551e-13	8.88178e-16	0	0
Phalsbourg	PHAL	48.77	7.27	0	0	0	0	0	0	0	3.26406e-14	0	0	0	0	0	0	0	0	0	0	0	0	0	0	0	0	0	0	0	0	0	0	0	0	0	0	0	0	0	0	0	0	0	0	0	0	0	0
Ramatuelle	RAM	43.22	6.62	1.95386e-10	0	1.29136e-10	0	0	7.77156e-16	0	0	0	1.74932e-11	0	0	0	0	4.44089e-15	5.21805e-15	0	0	0	2.22045e-16	6.2339e-13	4.83058e-13	0	1.71996e-12	0	4.07452e-14	0	3.33067e-16	0	0	0	1.44329e-15	0	0	0	5.84174e-11	0	0	6.18228e-12	0	0	2.77878e-12	6.79989e-12	1.95922e-11	0	0
Rennes	REN	48.08	-1.68	0	0	0	0	0	0	0	3.33067e-16	0	0	0	0	0	0	0	0	0	0	0	0	0	0	0	0	0	0	0	0	0	0	0	0	0	0	0	0	0	0	0	0	0	0	0	0	2.23155e-14	0
Romilly-sur-Seine	RSS	48.52	3.72	0	0	0	0	0	0	0	4.88498e-14	0	0	0	0	0	0	0	0	0	0	0	0	0	0	0	0	0	0	0	0	0	0	0	0	0	0	1.11022e-16	0	0	0	0	0	0	0	0	0	0	0
Rothau	ROT	48.45	7.22	0	0	0	0	0	0	0	3.59934e-13	0	0	0	0	0	0	0	0	0	0	0	0	0	0	0	0	0	0	0	0	0	0	0	0	0	0	0	0	0	0	1.11022e-16	0	0	0	0	0	0	0
Royan	ROY	45.63	-1.03	0	0	0	0	0	0	0	0	0	0	0	0	0	0	0	0	0	0	0	0	0	0	0	0	0	0	0	0	0	0	0	0	0	0	0	0	0	0	0	0	0	0	0	0	0	0
Saint Etienne	STE	45.43	4.4	0	0	0	0	0	0	0	0	0	0	0	0	0	0	0	0	0	0	0	0	0	0	0	0	0	0	0	0	0	0	0	0	0	0	0	0	0	0	0	0	0	0	0	0	0	0
Saint-Didier de Baujeu	SDB	46.15	4.55	0	0	0	0	0	0	0	3.9968e-15	0	0	0	0	0	0	0	0	0	0	0	0	0	0	0	0	0	0	0	0	0	0	0	0	0	0	0	0	0	0	0	0	0	0	0	0	0	0
Saint-Flour	SFL	45.03	3.1	0	0	0	0	0	0	0	2.22045e-16	0	0	0	0	0	0	0	0	0	0	0	0	0	0	0	1.11022e-16	0	0	0	0	0	0	0	0	0	0	0	2.22045e-16	0	0	1.11022e-16	0	0	0	0	0	0	0
Saint-Genis-Laval	SGL	45.68	4.8	0	0	0	0	0	0	0	0	0	0	0	0	0	0	0	0	0	0	0	0	0	0	0	7.77156e-16	0	0	0	0	0	0	0	0	0	0	0	0	0	0	4.44089e-16	0	0	0	0	0	0	0
Saint-Laurent de la Pree	SLP	45.98	-1.03	0	0	0	0	0	0	0	0	0	0	0	0	0	0	0	0	0	0	0	0	0	0	0	0	0	0	0	0	0	0	0	0	0	0	0	0	0	0	0	0	0	0	0	0	0	0
Saint-Martin d'Heres	SMH	45.17	5.77	9.99201e-16	0	0	0	0	0	0	1.55431e-15	0	0	0	0	0	0	0	0	0	0	0	0	0	0	0	2.11609e-13	0	0	0	0	0	0	0	0	0	0	0	8.88178e-16	0	0	2.55351e-14	0	0	7.10543e-15	1.44329e-15	0	0	0
Saint-Veran	SV	45.92	4.53	0	0	0	0	0	0	0	2.59792e-14	0	0	0	0	0	0	0	0	0	0	0	0	0	0	0	0	0	0	0	0	0	0	0	0	0	0	0	0	0	0	0	0	0	0	0	0	0	0
Sete	SET	43.4	3.68	3.33067e-16	0	0	0	0	0	0	0	0	0	0	0	0	0	0	0	0	0	0	0	0	0	0	9.4369e-15	0	0	0	0	0	0	0	2.9643e-14	0	0	0	0	0	0	1.22125e-15	0	0	2.22045e-16	3.33067e-16	0	0	0
Strasbourg	STR	48.58	7.75	0	0	0	0	0	0	0	2.95419e-12	0	0	0	0	0	0	0	0	0	0	0	0	0	0	0	0	0	0	0	0	0	0	0	0	0	0	0	0	0	0	0	0	0	0	0	0	0	0
Toulon	TLO	43.12	5.93	6.39072e-11	0	6.07292e-14	0	0	2.22045e-16	0	0	0	1.64091e-13	1.33227e-15	0	0	0	4.44089e-16	7.77156e-16	0	0	0	2.22045e-16	7.43849e-14	2.36478e-14	5.55112e-16	7.67275e-13	0	3.10862e-15	0	1.11022e-16	0	0	0	1.42109e-14	1.62093e-14	0	0	1.29752e-12	0	2.22045e-15	6.95666e-13	0	0	2.20934e-13	6.04294e-13	1.86517e-14	1.11022e-16	0
Toulouse-Blagnac	TOU	43.6	1.43	0	0	0	0	0	0	0	0	0	0	0	0	0	0	0	0	0	0	0	0	0	0	0	2.22045e-16	0	0	0	0	0	0	0	1.11022e-16	0	0	0	0	0	0	1.11022e-16	0	0	1.11022e-16	0	0	0	0
Tulle	TUL	45.27	1.77	0	0	0	0	0	0	0	0	0	0	0	0	0	0	0	0	0	0	0	0	0	0	0	0	0	0	0	0	0	0	0	0	0	0	0	0	0	0	0	0	0	0	0	0	0	0
Valleraugue	VAL	44.08	3.64	1.33227e-15	0	0	0	0	0	0	0	0	0	0	0	0	0	0	0	0	0	0	0	0	0	0	2.22045e-16	0	0	0	0	0	0	0	0	0	0	0	0	0	0	1.11022e-16	0	0	0	0	0	0	0
Vichy-Charmeil	VIC	46.12	3.42	0	0	0	0	0	0	0	1.62093e-14	0	0	0	0	0	0	0	0	0	0	0	0	0	0	0	0	0	0	0	0	0	0	0	0	0	0	0	0	0	0	0	0	0	0	0	0	0	0
Villefranche sur Saône	VSS	45.98	4.72	0	0	0	0	0	0	0	9.87765e-13	0	0	0	0	0	0	0	0	0	0	0	0	0	0	0	0	0	0	0	0	0	0	0	0	0	0	0	0	0	0	0	0	0	0	0	0	0	0
Other Countries
Central England	CET	51.5	-0.12	0	4.0918e-11	0	0	0	0	0	6.66134e-15	6.43929e-15	0	1.70974e-14	0	0	0	0	1.11022e-14	1.11022e-16	0	3.06276e-11	0	0	1.55431e-15	0	0	0	0	7.77156e-16	0	5.55112e-16	0	0	0	2.09832e-14	0	5.55112e-16	0	0	0	0	7.09353e-11	1.38102e-11	0	0	0	1.37007e-09	0
De Bilt (Netherland)	BILT	52.1	5.18	0	1.14237e-10	4.55191e-15	1.55043e-12	0	1.11022e-15	3.63043e-14	1.11852e-10	3.27052e-10	1.11022e-16	1.11022e-16	8.65485e-12	5.01821e-14	4.56302e-13	0	2.14739e-12	1.22125e-15	4.06162e-11	4.99506e-10	0	6.66134e-16	3.11251e-12	9.99201e-16	1.44329e-15	1.55431e-15	4.16489e-12	2.22045e-16	0	1.64313e-14	2.66044e-11	0	0	1.11022e-15	0	2.44139e-11	7.17204e-14	1.94322e-12	0	9.37028e-14	1.63458e-10	1.45506e-11	2.79776e-14	0	1.22125e-15	7.79418e-09	2.04614e-13
Karlsruhe (Germany)	KARL	49.02	8.38	0	0	1.46693e-10	4.55191e-15	0	0	0	4.35518e-12	0	4.5387e-12	0	7.77156e-16	0	0	1.11022e-16	6.46438e-12	0	0	0	0	1.8927e-11	1.36684e-10	0	1.97169e-08	0	1.11022e-16	0	0	0	0	0	2.39386e-12	0	0	0	9.50503e-09	0	0	6.26166e-08	0	0	1.52898e-07	1.93177e-09	6.56256e-11	2.22045e-16	0
Milan (Italy)	MIL	45.46	9.19	1.38375e-09	0	3.86235e-12	0	0	0	0	2.43083e-12	0	1.25e-12	0	4.44089e-15	0	0	7.9492e-14	1.11022e-16	0	0	0	0	2.27707e-13	1.32117e-14	0	5.2238e-11	0	4.95493e-13	0	0	0	0	0	2.0095e-14	0	0	0	6.74552e-10	0	0	1.54321e-10	0	0	2.93413e-10	1.6478e-11	2.12108e-12	0	0
Stuttgart (Germany)	STU	48.72	9.22	0	0	1.44329e-15	0	0	0	0	4.98301e-12	1.11022e-16	0	0	4.44089e-16	0	0	0	0	0	0	0	0	0	0	0	1.11022e-16	0	3.33067e-16	0	0	0	0	0	0	0	0	0	9.99201e-16	0	0	1.9984e-14	0	0	1.29896e-14	0	0	0	0
Geneve (Switzerland)	GEN	46.12	6.09	0	0	0	0	0	0	0	2.22045e-16	0	0	0	0	0	0	0	0	0	0	0	0	0	0	0	0	0	0	0	0	0	0	0	0	0	0	0	0	0	0	1.11022e-16	0	0	0	0	0	0	0
Luxembourg (Luxembourg)	LUX	49.37	6.12	0	1.57854e-10	1.07359e-13	4.10783e-15	0	7.92699e-14	9.10383e-15	5.18115e-08	1.17025e-08	0	2.13607e-13	1.25122e-13	3.3348e-11	4.32987e-15	0	0	2.22045e-16	2.48972e-11	9.33209e-12	0	0	0	0	6.55032e-15	3.33067e-16	1.11022e-16	0	0	4.54081e-14	7.24976e-13	0	3.77476e-15	0	0	3.18819e-08	5.44009e-15	1.11022e-16	0	1.26921e-12	4.03468e-10	5.99965e-13	9.48019e-13	0	1.11022e-16	2.18837e-11	1.66533e-15
Navacerrada (Spain)	NAV	40.46	-4	7.59908e-05	2.86557e-09	0.000160743	9.4928e-08	4.38347e-07	4.72191e-05	2.58888e-08	1.91924e-08	2.90392e-06	2.68112e-05	0.000115574	4.69977e-09	4.72734e-10	1.41713e-08	1.82465e-05	2.86545e-06	6.1692e-08	4.63276e-10	4.08748e-10	0.000188876	1.40281e-05	4.87336e-05	4.35531e-06	2.02056e-06	2.47804e-08	3.851e-07	2.13221e-06	5.76931e-05	4.75024e-08	3.29045e-09	2.55796e-06	1.6391e-06	6.38944e-05	5.85465e-05	6.00972e-08	9.71312e-05	1.51825e-08	4.84242e-05	3.35911e-07	1.17001e-10	1.47551e-09	4.51516e-07	4.54281e-05	4.2098e-06	2.18734e-08	3.69589e-08
Salamanca (Spain)	SAL	40.56	-5.29	0.00042501	2.00677e-05	8.29741e-05	1.60837e-06	1.2888e-05	0.000104251	2.93258e-07	7.00668e-06	3.57615e-06	6.19225e-05	0.00058402	9.8091e-07	1.27444e-06	6.34482e-07	0.000126975	1.27778e-05	1.04756e-06	4.18879e-08	2.23931e-07	0.000435664	2.99183e-05	0.000239197	2.65324e-05	2.08109e-05	5.98594e-07	1.53622e-06	1.83132e-05	0.000283226	3.6232e-06	5.45341e-07	2.17595e-05	1.18896e-05	0.000178171	0.000592109	6.25024e-06	0.000320793	4.03985e-07	0.000250771	3.74811e-06	4.12858e-07	1.78245e-06	1.46099e-05	8.46019e-05	7.58624e-06	2.35118e-06	1.37001e-06
[truncated: 47 more columns]
